# Supplementary material for: Increasing age- and gender-specific burden and complexity of multimorbidity in Taiwan, 2003–2013: a cross-sectional study based on nationwide claims data
Source: PubMed Central journal article supplement — BMJ Open. 2019 Jun 9;9(6):e028333. doi: 10.1136/bmjopen-2018-028333 (PMC6561441; doi:10.1136/bmjopen-2018-028333), 2019-06-09

Table S1. ICD-9-CM codes regarding the definition of 20 common diseases

| <b>Disease</b>                             | <b>ICD-9-CM code</b>                                                                                                                                                                                                                                                                                                                                                                    |
|--------------------------------------------|-----------------------------------------------------------------------------------------------------------------------------------------------------------------------------------------------------------------------------------------------------------------------------------------------------------------------------------------------------------------------------------------|
| Hypertension                               | 401, 402, 403, 404, 405                                                                                                                                                                                                                                                                                                                                                                 |
| Diabetes                                   | 250                                                                                                                                                                                                                                                                                                                                                                                     |
| Congestive heart failure                   | 39891, 40201, 40211, 40291, 40401, 40403, 40411, 40413, 40491, 40493, 4254, 4255, 4257, 4258, 4259, 428                                                                                                                                                                                                                                                                                 |
| Coronary syndrome                          | 410, 411, 412, 413, 414                                                                                                                                                                                                                                                                                                                                                                 |
| Cardiac dysrhythmias                       | 427                                                                                                                                                                                                                                                                                                                                                                                     |
| Peripheral vascular disease                | 0930, 4373, 4400, 4401, 44020, 44021, 44022, 44023, 44024, 44029, 44030, 44031, 44032, 4408, 4409, 44100, 44101, 44102, 44103, 4411, 4412, 4413, 4414, 4415, 4416, 4417, 4419, 4431, 44321, 44322, 44323, 44324, 44329, 44381, 44382, 44389, 4439, 4471, 5571, 5579, V434                                                                                                               |
| Cerebrovascular disease                    | 36234, 430, 431, 432, 43300, 43301, 43310, 43311, 43320, 43321, 43330, 43331, 43380, 43381, 43390, 43391, 434, 4350, 4351, 4352, 4353, 4358, 4359, 436, 437, 438                                                                                                                                                                                                                        |
| Chronic pulmonary disease                  | 4168, 4169, 490, 491, 492, 493, 4940, 4941, 4950, 4951, 4952, 4953, 4954, 4955, 4956, 4957, 4958, 4959, 496, 500, 501, 502, 503, 504, 505, 5064, 5081, 5088                                                                                                                                                                                                                             |
| Renal disease                              | 403, 404, 5820, 5821, 5822, 5824, 58281, 58289, 5829, 5830, 5831, 5832, 5834, 5836, 5837, 584, 585, 586, 5880, V420, V451, V560, V561, V562, V5631, V5632, V568                                                                                                                                                                                                                         |
| Liver disease                              | 07022, 07023, 07032, 07033, 07044, 07054, 0706, 0709, 570, 5710, 5711, 5712, 5713, 57140, 57141, 57149, 5715, 5716, 5718, 5719, 5733, 5734, 5738, 5739, V427, 4560, 4561, 45620, 45621, 5722, 5723, 5724, 5728                                                                                                                                                                          |
| Dementia                                   | 290, 2930, 2931, 29381, 29382, 29383, 29384, 29389, 2939, 2940, 2941, 2948, 2949, 3100, 3101, 3102, 3108, 3109, 3310, 3311, 3312                                                                                                                                                                                                                                                        |
| Other neurological disorders               | 3319, 332, 3334, 3335, 33392, 3340, 3341, 3342, 3343, 3344, 3348, 3349, 3350, 33510, 33511, 33519, 33520, 33521, 33522, 33523, 33524, 33529, 3358, 3359, 3362, 340, 3410, 3411, 34120, 34121, 34122, 3418, 3419, 34500, 34501, 34510, 34511, 3452, 3453, 34540, 34541, 34550, 34551, 34560, 34561, 34570, 34571, 34580, 34581, 34590, 34591, 3481, 3483, 34830, 34831, 34839, 780, 7843 |
| Digestive disorder                         | 530, 531, 532, 53300, 53301, 53310, 53311, 53320, 53321, 53330, 53331, 53340, 53341, 53350, 53351, 53360, 53361, 53370, 53371, 53390, 53391, 53400, 53401, 53410, 53411, 53420, 53421, 53430, 53431, 53440, 53441, 53450, 53451, 53460, 53461, 53470, 53471, 53490, 53491, 536, 558, 564                                                                                                |
| Osteoporosis                               | 733                                                                                                                                                                                                                                                                                                                                                                                     |
| Arthritis (including rheumatoid arthritis) | 274, 710, 711, 714, 715, 716, 718, 720, 727, 728, 729, 739                                                                                                                                                                                                                                                                                                                              |

Table S1. ICD-9-CM codes regarding the definition of 20 common diseases (continued)

| <b>Disease</b>                                 | <b>ICD-9-CM code</b>                                                                                                                                                                                                                   |
|------------------------------------------------|----------------------------------------------------------------------------------------------------------------------------------------------------------------------------------------------------------------------------------------|
| Anxiety, dissociative and somatoform disorders | 30000-30002, 30009-30016, 30019-30023, 30029, 3003, 3005-3007, 30081, 30082, 30089, 3009, 3062, 3069, 30740-30749, 3080-3084, 3089, 316                                                                                                |
| Bipolar disorder                               | 29600-29606, 29610-29616, 29640-29646, 29650-29656, 29660-29666, 2967, 29680-29682, 29689                                                                                                                                              |
| Depression                                     | 29620-29626, 29630-29636, 29690, 29699, 2980, 3090, 3091, 311                                                                                                                                                                          |
| Schizophrenia and psychotic disorders          | 29500-29505, 29510-29515, 29520-29525, 29530-29535, 29540-29545, 29550-29555, 29560-29565, 29570-29575, 29580-29585, 29590-29595, 2970-2973, 2978, 2979, 2981-2984, 2988, 2989, 29900, 29901, 29910, 29911, 29980, 29981, 29990, 29991 |
| Cancer                                         | 140-239                                                                                                                                                                                                                                |

Figure S1. The sampling and data linkage process of the 2005 and 2010 Longitudinal Health Insurance Databases (LHID)

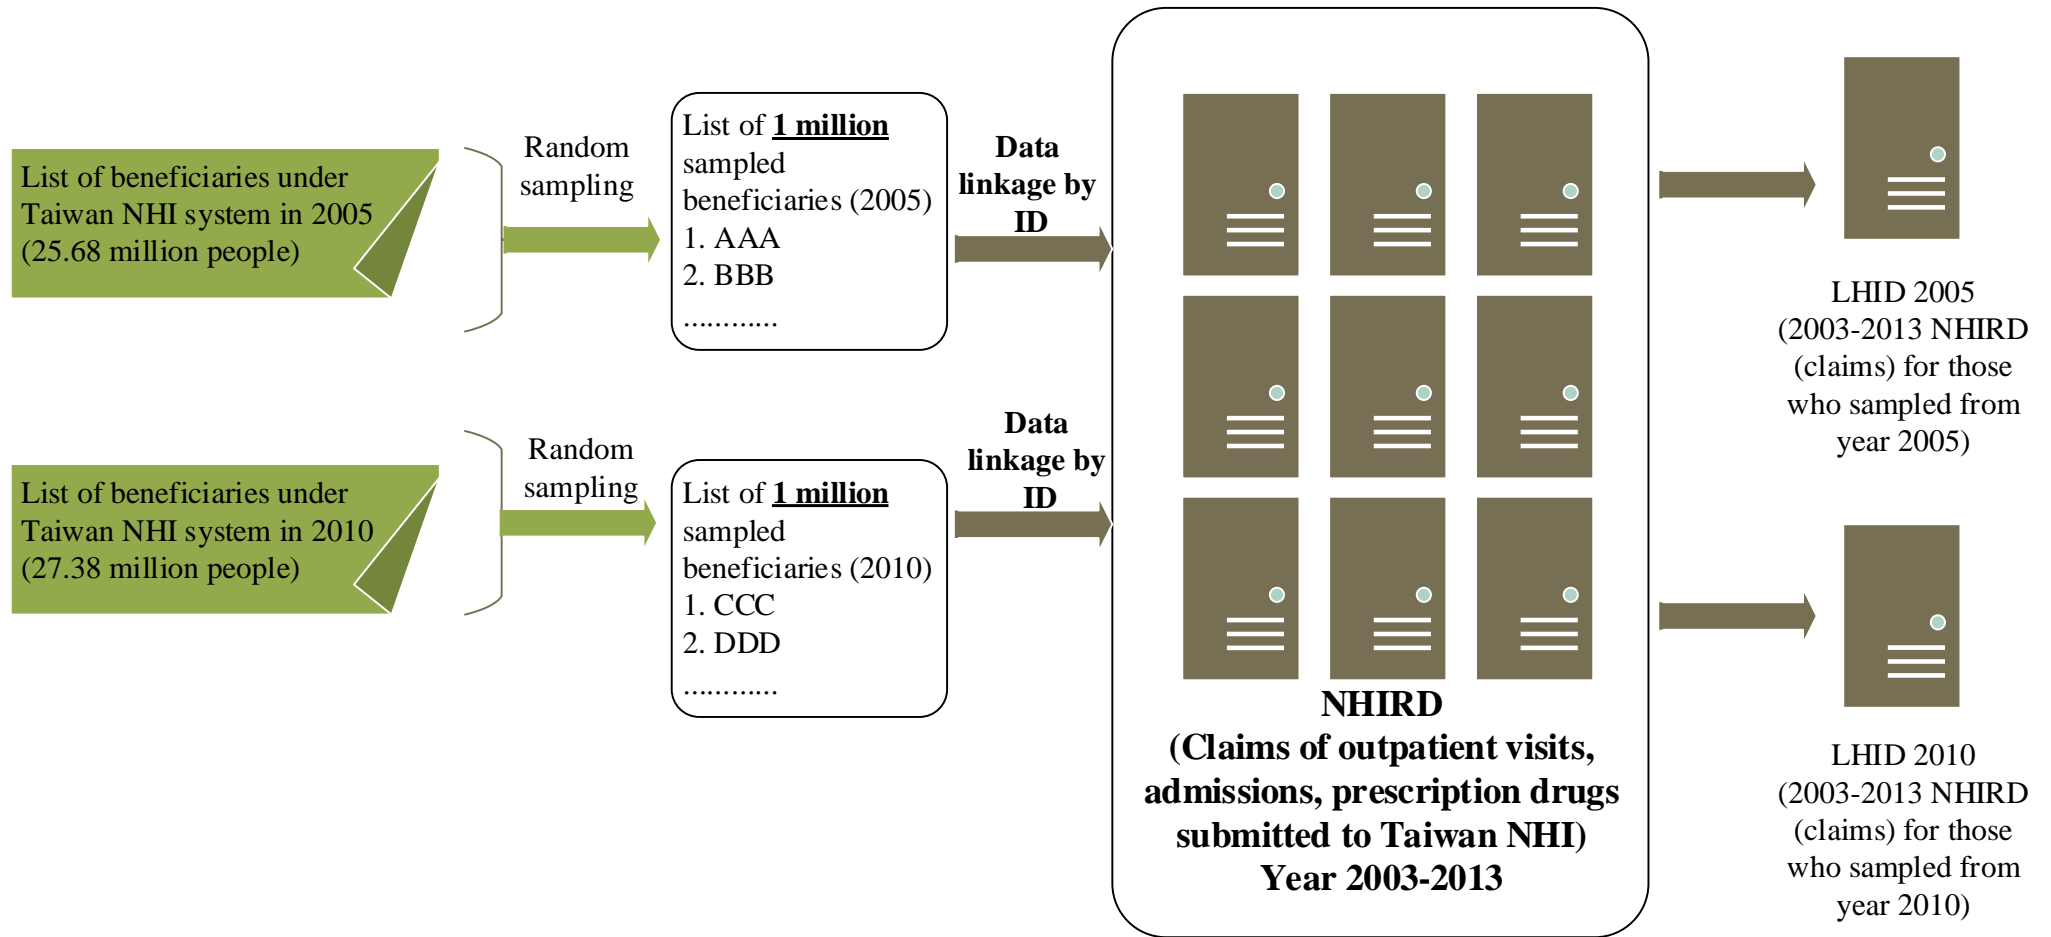

Figure S2. Prevalence of multi-morbidity in Taiwan by number of common diseases, age group, and year

(a) Year of 2003

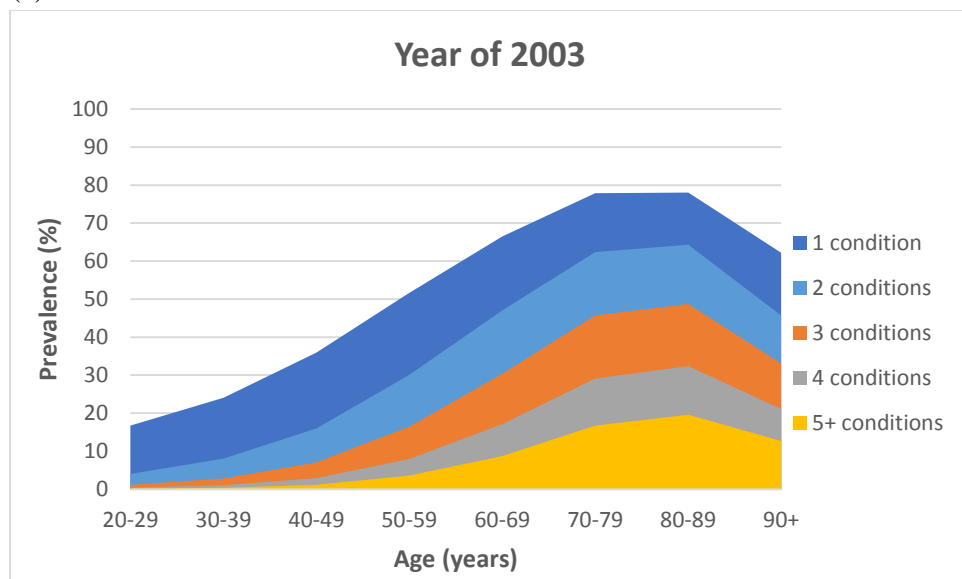

(b) Year of 2013

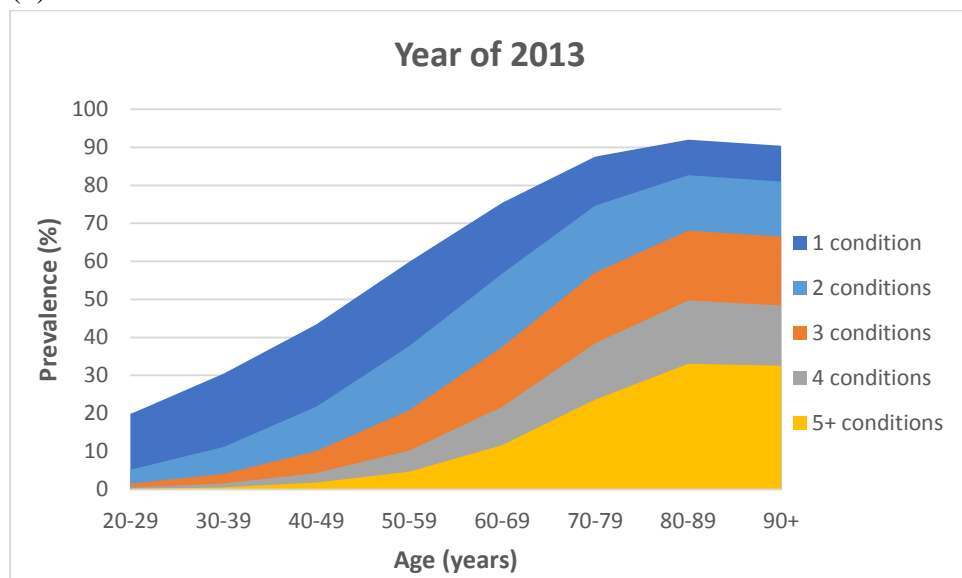

Supplement: bmjopen-2018-028333supp001.pdf [file bmjopen-2018-028333supp001.pdf]
