# Supplementary material for: Increasing age- and gender-specific burden and complexity of multimorbidity in Taiwan, 2003–2013: a cross-sectional study based on nationwide claims data
Source: PubMed Central journal article supplement — BMJ Open. 2019 Jun 9;9(6):e028333. doi: 10.1136/bmjopen-2018-028333 (PMC6561441; doi:10.1136/bmjopen-2018-028333), 2019-06-09
Supplement: bmjopen-2018-028333.draft_revisions.pdf [file bmjopen-2018-028333.draft_revisions.pdf]

# BMJ Open

BMJ Open is committed to open peer review. As part of this commitment we make the peer review history of every article we publish publicly available.

When an article is published we post the peer reviewers' comments and the authors' responses online. We also post the versions of the paper that were used during peer review. These are the versions that the peer review comments apply to.

The versions of the paper that follow are the versions that were submitted during the peer review process. They are not the versions of record or the final published versions. They should not be cited or distributed as the published version of this manuscript.

BMJ Open is an open access journal and the full, final, typeset and author-corrected version of record of the manuscript is available on our site with no access controls, subscription charges or pay-per-view fees (<http://bmjopen.bmj.com>).

If you have any questions on BMJ Open's open peer review process please email [info.bmjopen@bmj.com](mailto:info.bmjopen@bmj.com)

# BMJ Open

## The Increasing Age- and Gender- Specific Burden and Complexity of Multimorbidity in Taiwan, 2003-2013

|                               |                                                                                                                                                                                                                                                                                                                                                                                                                                                                                              |
|-------------------------------|----------------------------------------------------------------------------------------------------------------------------------------------------------------------------------------------------------------------------------------------------------------------------------------------------------------------------------------------------------------------------------------------------------------------------------------------------------------------------------------------|
| Journal:                      | <i>BMJ Open</i>                                                                                                                                                                                                                                                                                                                                                                                                                                                                              |
| Manuscript ID                 | bmjopen-2018-028333                                                                                                                                                                                                                                                                                                                                                                                                                                                                          |
| Article Type:                 | Research                                                                                                                                                                                                                                                                                                                                                                                                                                                                                     |
| Date Submitted by the Author: | 03-Dec-2018                                                                                                                                                                                                                                                                                                                                                                                                                                                                                  |
| Complete List of Authors:     | Hu, Rey-Hsing ; National Taiwan Ocean University, Department of Computer Science and Engineering<br>Hsiao, Fei-Yuan; National Taiwan University, Graduate Institute of Clinical Pharmacy, College of Medicine<br>Chen, Li-Ju; National Taiwan University, Health Data Research Center<br>Huang, Pei-Ting; National Taiwan Ocean University, Department of Computer Science and Engineering<br>Hsu, William; National Taiwan Ocean University, Department of Computer Science and Engineering |
| Keywords:                     | disease burden, multimorbidity, National Health Insurance Research Database                                                                                                                                                                                                                                                                                                                                                                                                                  |
|                               |                                                                                                                                                                                                                                                                                                                                                                                                                                                                                              |

SCHOLARONE™  
Manuscripts

1  
2  
3  
4 **The Increasing Age- and Gender- Specific Burden and Complexity of**  
5  
6  
7 **Multimorbidity in Taiwan, 2003-2013**  
8  
9

10 Rey-Hsing Hu, M.S.<sup>1</sup>, Fei-Yuan Hsiao, Ph.D.<sup>2,3,4</sup>, Li-Ju Chen, M.S.<sup>5</sup>,

11  
12  
13 Pei-Ting Huang, M.S.<sup>1</sup>, William W.Y. Hsu, Ph.D.<sup>1\*</sup>  
14  
15

16 <sup>1</sup>Department of Computer Science and Engineering, National Taiwan Ocean  
17  
18 University, Keelung, Taiwan;  
19  
20

21  
22 <sup>2</sup>Graduate Institute of Clinical Pharmacy, College of Medicine, National Taiwan  
23  
24 University, Taipei, Taiwan;  
25  
26

27  
28 <sup>3</sup> School of Pharmacy, College of Medicine, National Taiwan University, Taipei,  
29  
30 Taiwan;  
31  
32

33  
34 <sup>4</sup>Department of Pharmacy, National Taiwan University Hospital, Taipei, Taiwan.  
35  
36

37 <sup>5</sup>Health Data Research Center, National Taiwan University, Taipei, Taiwan  
38  
39  
40  
41  
42  
43  
44

45 \* Correspondence:

46  
47 William W.Y. Hsu, Assistant professor  
48  
49

50 Department of Computer Science and Engineering, National Taiwan Ocean  
51  
52

53 University, Keelung, Taiwan  
54  
55

56 E-mail: [wwyhsu@ntou.edu.tw](mailto:wwyhsu@ntou.edu.tw)  
57  
58  
59  
60

1  
2  
3  
4  
5  
6  
7 **Running heads:** Burden and Complexity of Multimorbidity in Taiwan, 2003-2013  
8  
9

10 **Word Counts:**  
11

12  
13 Abstract: 298 words  
14

15  
16 Text word counts: 2902 words  
17

18  
19 Figure counts: 2 figures  
20

21  
22 Table counts: 3 tables  
23

24  
25 Others: 1 supplementary file  
26

27  
28 Reference: 30  
29  
30  
31  
32  
33

34 **Author Contributions:**  
35

36  
37 Hu RH, Hsiao FY, Chen LJ, and Hsu WY contributed to the study concept and  
38  
39 design. Hsiao FY, Hu RH, Huang PT acquired and analyzed the data. Hsiao FY and  
40  
41 Chen LJ interpreted the data. Hsiao FY, Chen LJ, and Hsu WY drafted the  
42  
43 manuscript. Hsiao FY and Hsu WY revised the manuscript. All authors read and  
44  
45 approved the final manuscript.  
46  
47  
48  
49  
50  
51  
52  
53  
54

55 **Funding:**  
56

57  
58 Dr. Hsu WY received research assistantships from a research project (MOST107-  
59  
60

1  
2  
3  
4 2221-E-019-037-MY3) sponsored by the Ministry of Science and Technology

5  
6  
7 Taiwan. Dr. Hsiao FY received research assistantships from a research project

8  
9  
10 (MOST 104-2410-H-002-225-MY3) sponsored by the Ministry of Science and

11  
12  
13 Technology Taiwan.

14  
15  
16  
17  
18  
19 **Disclosure of Conflicts of Interests:**

20  
21  
22 None.

23  
24  
25  
26  
27  
28 **Keywords:** disease burden, multimorbidity, National Health Insurance Research

29  
30  
31 Database

## ABSTRACT

### Objectives

Although there are accumulating evidence in multimorbidity in Western countries, that in Asian countries is very limited. This study aimed to estimate the population-based, age- and gender-specific prevalence and trends of multimorbidity in the Taiwanese population.

### Design

Cross-sectional study based on claims data (National Health Insurance Research Database, Taiwan).

### Participants

A subset of the NHIRD, which contains claim data for 2 million of randomly selected beneficiaries (~10% of total population) under Taiwan's mandatory National Health Insurance system.

### Outcome measurements

The prevalence of multimorbidity in different age groups and both sexes in the years 2003 and 2013 was reported. We further revealed data on the prevalence of 20 common diseases or deficits in each age group and sex. As for clustering effect, we used graphic displays on the likelihood of co-occurrence with 1, 2, 3, and 4 or more other diseases or deficits for each selected disease or deficit in the years 2003 and

1  
2  
3  
4 2013.  
5  
6

## 7 **Results**

8  
9  
10 The prevalence of multimorbidity was 37.23 % in 2003 and 48.97 % in 2013. In 2013,  
11  
12 the prevalence varied between 19.85 % in patients aged 20-29 years and 92.01% in  
13  
14 those aged 80-89 years. In patients aged between 50 and 79 years, the prevalence of  
15  
16 multimorbidity was higher in women than that in men. In men, the prevalence of  
17  
18 chronic pulmonary disease and cardiovascular-related diseases was predominant  
19  
20 while in women, the prevalence of osteoporosis, arthritis, cancer, and psychosomatic  
21  
22 disorders were predominant. The co-occurring diseases/deficits within each  
23  
24 disease/deficit varied across different age and gender groups.  
25  
26  
27  
28  
29  
30  
31  
32  
33

## 34 **Conclusions**

35  
36  
37 The burden of multimorbidity was increasing and becoming more complex in Taiwan.  
38  
39  
40 It also varied across different age and gender groups. Fulfilling the needs of  
41  
42 individuals with multimorbidity requires collaborative work across health care  
43  
44 providers and needs to take into account age and gender disparities in multimorbidity.  
45  
46  
47  
48  
49  
50  
51  
52  
53  
54  
55  
56  
57  
58  
59  
60

## Strengths and limitations of this study

- This is the first nationwide study conducted in Taiwan to assess the age- and gender-specific burden and complexity of multimorbidity between 2003 and 2013.
- Multimorbidity was defined using existing methods to classify and consider geographic or ethnic discrepancies between Western and Asian countries.
- We identified multimorbidity based on the diagnoses recorded in the outpatient or inpatient visit. However, only up to three and up to five diagnoses were allowed to be recorded in each outpatient or inpatient visit in the NHIRD, the prevalence of multimorbidities may be underestimated



## Introduction

Multimorbidity, defined as the coexistence of two or more chronic health conditions in the same person at the same time, has become a significant challenge to the healthcare systems worldwide. Previous studies have reported that multimorbidity was associated with worse clinical outcomes, poorer quality of life and increased medical expenditures at individual level<sup>1 2</sup>At the nationwide level, multimorbidity also incurs significant social and economic burden due to complex health and welfare demands as well as associated costs to care for individuals with multimorbidity<sup>1 2</sup>. These demands are expected to increase as the society aged as the prevalence of multimorbidity also increased with age<sup>3</sup>. However, effective strategies to manage multimorbidity remain unanswered. These may be due to the single-disease paradigm in the current clinical setting, which may result in fragmented care for patients manifesting multimorbidity.

To manage multimorbidity, it is necessary to measure the burden of multimorbidity.

However, the phenomenon of multimorbidity is not well understood. A simple count of diseases in each identified either through self-reporting<sup>4</sup>or by extracting information from electronic medical record using lists of diagnostic codes<sup>5-8</sup> is the first and common approach. The extrapolation of the abovementioned studies,

1  
2  
3  
4 however, is difficult due to several limitations. First, most of the estimates came from  
5  
6  
7 selected medical institutions<sup>3 9-12</sup> or limited to the specific population such as the  
8  
9  
10 elderly<sup>3</sup>. Some studies using a survey to collect the potential prevalence of  
11  
12  
13 multimorbidities in patients who visit their general practitioners<sup>13 14</sup>. Population-  
14  
15  
16 based estimates are usually very limited. Second, the lists of diagnosis are likely to  
17  
18  
19 differ substantially between studies<sup>6 15 16</sup>. To the best of our knowledge, there is  
20  
21  
22 currently no single set of codes that have been consistently used to identify patients  
23  
24  
25 with multimorbidity. Third, the prevalence of multimorbidity in Asian countries is  
26  
27  
28 very limited while the prevalence of multimorbidity may vary ethnically or  
29  
30  
31 geographically.  
32

33  
34  
35  
36  
37 To fill the current knowledge gap, this study aimed to estimate the population-based,  
38  
39  
40 age- and gender-specific prevalence and trends of multimorbidity using Taiwan's  
41  
42  
43 National Health Insurance Research Database (NHIRD).  
44  
45  
46  
47  
48  
49  
50  
51  
52  
53  
54  
55  
56  
57  
58  
59  
60

## Methods

### Data source

A population-based cross-sectional study was conducted using administrative claims data from Taiwan's National Health Insurance Research Database (NHIRD). The NHIRD is a nationwide claims-based database comprising anonymous eligibility and enrollment information, as well as claims for outpatient visits, admissions, procedures and prescription medications of more than 99 % of the entire population (23 million) in Taiwan <sup>17</sup>.

We used a subset of the NHIRD, which contains claim data for 2 million of randomly selected beneficiaries to create an 11-year (2003-2013) panel of claims for analysis. In this study, we used two subsets of the NHIRD, the Longitudinal Health Insurance Database (LHID) 2005 and 2010 as our data source. These two datasets were made up of claims data on one million beneficiaries that were randomly captured from the Registry of Beneficiaries of the NHIRD in the years 2005 and 2010. Also, there were no significant differences in the gender distribution between patients in the LHID 2005 and the original NHIRD ( $\chi^2=0.008$ ,  $df=1$ ,  $p$ -value=0.931), and between those in the LHID 2010 and the original NHIRD ( $\chi^2=0.067$ ,  $df=1$ ,  $p$ -value=0.796)<sup>18</sup>. Therefore, the two subsets were thought to be representative enough of the original NHIRD, and

1  
2  
3  
4 the results obtained suggested generalizability to the whole Taiwanese population.  
5  
6  
7  
8  
9

10 A total of two million individuals, which composed approximately 10% of the total  
11  
12  
13 population in Taiwan, constituted the study population of this study. The identification  
14  
15  
16 numbers and all traceable personal identifiers of the insured in NHIRD were encrypted  
17  
18  
19 to ensure the confidentiality and privacy. In this way, this study was exempt from full  
20  
21  
22 review by the Institutional Review Board of the National Taiwan University Hospital,  
23  
24  
25 Taipei, Taiwan, and the requirement for providing informed consent was not imposed.  
26  
27  
28  
29  
30

### 31 **Ethical statement**

32  
33  
34 The identification numbers for all of the entries in the NHIRD were encrypted to  
35  
36  
37 protect the privacy of the individual patients. The study protocol was approved by the  
38  
39  
40 Institution Review Board of the National Taiwan University Hospital (National  
41  
42  
43 Taiwan University Hospital Research Ethics Committee No. 201403069W).  
44  
45  
46  
47  
48

### 49 **Identification of common diseases or deficits**

50  
51  
52 We defined cases as patients who had at least three diagnoses with 20 common diseases  
53  
54  
55 or deficits upon outpatient visits during the study period. Similar with most previous  
56  
57  
58 studies focusing on multimorbidity, we also specify multimorbidity in this study on  
59  
60

1  
2  
3  
4 condition that patients concurrently suffered from two or more of these 20 common  
5  
6  
7 diseases or deficits The 20 common diseases or deficits included hypertension, diabetes,  
8  
9  
10 congestive heart failure, coronary syndrome, cardiac dysrhythmias, peripheral vascular  
11  
12  
13 disease, cerebrovascular disease, chronic pulmonary disease, renal disease, liver  
14  
15  
16 disease, dementia, other neurological disorders, digestive disorder, osteoporosis,  
17  
18  
19 arthritis (including rheumatoid arthritis), anxiety dissociative and somatoform disorders,  
20  
21  
22 bipolar disorder, depression, schizophrenia and psychotic disorders, and cancer. The  
23  
24  
25 detailed set of diagnostic codes regarding the definition of these common diseases or  
26  
27  
28 deficits was demonstrated in **Supplementary Table S1**. These diseases or deficits were  
29  
30  
31 selected based on the disease burden that they may fall on the whole society regarding  
32  
33  
34 considerable cost, the requirement for long-term care, reduced health-related quality of  
35  
36  
37 life, hospitalization, or death illustrated in previous studies<sup>6 19 20</sup>. There was a lack of  
38  
39  
40 consensus over what diseases or deficits should be included in the definition of  
41  
42  
43 multimorbidity. Nevertheless, we sought the union of the diseases included in two of  
44  
45  
46 the previous studies investigating multimorbidity<sup>6 19</sup> and those in a Taiwanese study  
47  
48  
49 evaluating the association between frailty and unplanned hospitalization, admission to  
50  
51  
52 intensive care units, and mortality<sup>20</sup>. In this way, we believed that the list of diseases  
53  
54  
55 which we adopted to define multimorbidity was capable of reflecting the disease burden  
56  
57  
58 the population carried and was applicable in the Taiwanese population.  
59  
60

## Statistical Analysis

We reported descriptive data on the prevalence of multimorbidity in different age groups (categorized into eight groups including 20-29, 30-39, 40-49, 50-59, 60-69, 70-79, 80-89, and 90+) and both sexes (men and women) in the years 2003 and 2013.

The prevalence of multimorbidity was calculated by dividing the number of patients afflicted with multimorbidity by population size in each age group regarding the degree of multimorbidity (grouped into 2, 3, 4, and 5+). We further revealed data on the prevalence of each of the 20 common diseases or deficits in each age group and sex.

The individual prevalence was the estimated fraction with the number of patients with each disease or deficit in each age and sex group as the numerator and with population size in each group and sex as the denominator.

As for clustering effect, we used graphic displays on the likelihood of co-occurrence with 1, 2, 3, and 4 or more other diseases or deficits for each selected disease or deficit in the years 2003 and 2013. The likelihood was the estimated proportion with the number of patients suffering from the same disease or deficit with concurrent 1, 2, 3, and 4 or more other diseases or deficits divided by the number of patients with a specific disease or deficit. We also adopted graphics to demonstrate differences in the prevalence of multimorbidity and clustering effect between both sexes and among age

1  
2  
3  
4 groups in 2003 and 2013, respectively. All data in this study were analyzed using  
5  
6  
7 Python programming language with Mongo database software, version 3.6.4 and 4.0.2.  
8  
9  
10  
11  
12

## 13 **Results**

16 In general, the prevalence of at least one of 20 common diseases or deficits was  
17  
18 37.23 % in 2003, and an approximately ten percent increase was observed in the year  
19  
20 of 2013 (48.97 % in 2013, **Table 1**). The prevalence of at least one disease or deficit  
21  
22 of 2013 (48.97 % in 2013, **Table 1**). The prevalence of at least one disease or deficit  
23  
24 ranged from 16.74 % in patients aged 20-29 years to 78.05 % in those aged 80-89 years  
25  
26 in 2003. In 2013, the prevalence varied between 19.85 % in patients aged 20-29 years  
27  
28 and 92.01% in those aged 80-89 years. Increases in the prevalence of at least one disease  
29  
30 or deficit were observed in all age groups, and the magnitude was from 3.11 % in  
31  
32 patients aged 20-29 years to a dramatic 28.21 % in those aged 90 years or above in the  
33  
34 years 2003 and 2013 (**Table 1**, Supplementary **Figure S1**). As for the multimorbidity,  
35  
36 the increasing prevalence across all age groups and different intensity of multimorbidity  
37  
38 was of great concern. For instance, the prevalence of three of 20 common diseases or  
39  
40 deficits was 30.39 % in patients aged 60-69 years in 2003, and an approximately seven  
41  
42 percent increase in prevalence was observed in 2013. In patients aged 90 years or above,  
43  
44 the increase was even more significant. Compared to the prevalence of three diseases  
45  
46 or deficits in 2003 (33.04 %, **Table 1**, Supplementary **Figure S1**), that in 2013 nearly  
47  
48  
49  
50  
51  
52  
53  
54  
55  
56  
57  
58  
59  
60

1  
2  
3  
4 doubled (66.52 %, **Table 1**, Supplementary **Figure S1**)  
5  
6

7 A dramatically growing increase in the prevalence of multimorbidity was noticed  
8  
9  
10 in all age groups, especially in those aged 90 years or above, in men and women in the  
11  
12 years 2003 and 2013 (**Figure 2**). Patterns of sex differences in the prevalence of  
13  
14 multimorbidity were similar between the years 2003 and 2013. To be more specific, the  
15  
16 prevalence of multimorbidity were comparable between men and women in patients  
17  
18 aged 49 years or younger. In patients aged between 50 and 79 years, however, the  
19  
20 prevalence of multimorbidity was higher in women than that in men. In patients aged  
21  
22 80-89 years, the sex difference in the prevalence of multimorbidity was subtle. In  
23  
24 patients aged 90 years, the sex difference in prevalence of multimorbidity was much  
25  
26 higher in men than that in women (**Figure 2**).  
27  
28  
29  
30  
31  
32  
33  
34  
35  
36

37 The prevalence of each of 20 common diseases or deficits was presented in **Table**  
38  
39  
40 **2**. The prevalence of all of the 20 common diseases or deficits remained comparable or  
41  
42 increased in all age groups between the years 2003 and 2013. Significantly growing  
43  
44 prevalence can be observed in cancer, dementia, cerebrovascular disease, and several  
45  
46 cardiovascular-related diseases, including hypertension, diabetes, congestive heart  
47  
48 failure, cardiac dysrhythmias, and peripheral vascular disease. The most frequently  
49  
50 seen diseases in Taiwanese population consisted of hypertension, other neurological  
51  
52 disorders, digestive disorder, and arthritis (including rheumatoid arthritis). Over half of  
53  
54  
55  
56  
57  
58  
59  
60



1  
2  
3  
4 patients aged elder than 70 years in 2013 were afflicted with hypertension, and nearly  
5  
6  
7 one-third of those suffering from other neurological disorder, digestive disorder, and  
8  
9  
10 arthritis (including rheumatoid arthritis). Although the prevalence of cancer and  
11  
12  
13 dementia was generally low in Taiwan, the disease burden caused by these two diseases  
14  
15  
16 cannot be overseen. There was nearly one-fifth of patients aged 90 years or above were  
17  
18  
19 affected by dementia and nearly one-sixth of patients aged 80 years or above lived with  
20  
21  
22 cancers in 2013. Also, there was a strikingly increasing trend in prevalence of older  
23  
24  
25 patients in these two diseases.  
26  
27

28 As shown in **Table 3**, the prevalence of each common diseases or deficits  
29  
30 increased in general between the years 2003 and 2013 in both men and women. In men,  
31  
32  
33 the prevalence of chronic pulmonary disease and cardiovascular-related diseases,  
34  
35  
36 including hypertension, congestive heart failure, peripheral vascular disease were  
37  
38  
39 predominant. In women, the prevalence of osteoporosis, arthritis (including rheumatoid  
40  
41  
42 arthritis), cancer, and psychosomatic disorders, including depression, anxiety, bipolar  
43  
44  
45 disorder, were predominant. As for dementia, interestingly, the prevalence in men was  
46  
47  
48 a bit higher in 2003, yet the condition was quite the other way in 2013.  
49  
50  
51

52 In **Figure 2**, we depicted sex differences in the prevalence of multimorbidity  
53  
54  
55 within individuals suffering from each common disease or deficit in 2003 and 2013.  
56  
57  
58 Generally, compared to the year of 2003, multimorbidity was more frequently seen in  
59  
60

1  
2  
3  
4 2013 in both sexes within all common diseases. Except for bipolar disorder and  
5  
6  
7 schizophrenia and psychotic disorders, which were least likely to occur with other  
8  
9  
10 diseases, other diseases might coexist with other diseases to some extents. In 2003,  
11  
12  
13 patients with anxiety, dissociative and somatoform disorders, digestive disorder, and  
14  
15  
16 hypertension were most likely to suffer from other diseases concurrently, but the sex  
17  
18  
19 difference was minor. In 2013, patients with the diseases mentioned above were most  
20  
21  
22 likely to have other diseases in the same time as well, the sex difference, on the contrary,  
23  
24  
25 was more noticeable. Specifically, a higher proportion of women suffering from anxiety,  
26  
27  
28 dissociative and somatoform disorders, and digestive disorder are of greater odds to  
29  
30  
31 have other concurrent diseases. Profound sex difference in multimorbidity can also be  
32  
33  
34 observed in patients with other diseases, including arthritis (including rheumatoid  
35  
36  
37 arthritis), osteoporosis, other neurological disorders, and liver disease, where women  
38  
39  
40 with the first three were of higher prevalence to concurrently have other diseases.  
41  
42  
43  
44  
45

## 46 **Discussions**

47  
48  
49 To the best of our knowledge, this population-based study is the largest and the  
50  
51  
52 most comprehensive epidemiologic study to provide age- and gender-specific  
53  
54  
55 information on multimorbidity in the Taiwanese population. Previous studies are all  
56  
57  
58 limited to Western Countries, such as Canada<sup>6</sup> or Australia<sup>13</sup>. Nevertheless, the  
59  
60

1  
2  
3  
4 etiology of multimorbidity may have geographical discrepancies. This information is  
5  
6  
7 therefore extremely fundamental for constructing national policies to combat the  
8  
9  
10 burden of multimorbidities, particularly in Asian countries. Our study also provides  
11  
12  
13 in-depth analyses of each selected disease/deficit and their concomitant comorbidities.  
14  
15  
16 This study could thus serve as valuable references for strategic thinking regarding  
17  
18  
19 sophisticated diseases management plans.  
20  
21  
22  
23  
24

25 We found that the prevalence of multimorbidities was increasing in the 10-years  
26  
27  
28 follow-up period. This increase is reasonable considering the threat of aging  
29  
30  
31 population <sup>21</sup> and is consistent with a previous study conducted in Ontario residents <sup>6</sup>.  
32  
33

34 The prevalence of multimorbidity among Ontarians rose from 17.4% in 2003 to  
35  
36  
37 24.3% in 2009, a 40% increase. In our study, the prevalence of multimorbidity rose  
38  
39  
40 from 20.07% in 2013 to 30.44 % in 2009, a 51.6% increase. Although the different  
41  
42  
43 magnitude of the increase could result from the various lists of diseases selected to  
44  
45  
46 count multimorbidity; the Ontario study includes 16 common chronic conditions<sup>6</sup>  
47  
48  
49 while our study includes 20 common chronic conditions. However, the speed of aging  
50  
51  
52 in the two different populations may explain the discrepancies better. The population  
53  
54  
55 is aging rapidly in Taiwan. Up until the end of 2010, 11% of Taiwan's population was  
56  
57  
58 aged more than 65 years. The ratio has been reached to 14% (the threshold for an  
59  
60

1  
2  
3  
4 “aged” society) by 2017, and the estimated ratio will expect to increase to 20% (the  
5  
6  
7 threshold for a “superaged” society) by 2025 in Taiwan <sup>22</sup>.  
8  
9

10  
11  
12  
13 Multimorbidity, particularly in the elderly, is therefore very important for almost  
14  
15  
16 every country. In our study, we found that the prevalence of multimorbidity (2+  
17  
18 diseases) in people aged 60-69, 70-79 and 80-89 were 56.84%, 74.64%, 82.64%,  
19  
20  
21 respectively, in 2013. The prevalence of multimorbidity (3+ diseases) in people aged  
22  
23  
24 60-69, 70-79 and 80-89 were 37.49%, 57.04%, 68.10%, respectively, in 2013. Facing  
25  
26  
27 such tremendous and complex medical demands, it is necessary to reform the current  
28  
29  
30 “single disease or specialty” paradigm into the “integrated and comprehensive  
31  
32  
33 medical care” model <sup>23</sup>. In our study, we also found that the combination and intensity  
34  
35  
36 of multimorbidity differed in older men and women. This finding may further indicate  
37  
38  
39 different medical needs for older men and women and gender-specific care plan for  
40  
41  
42 older people may be warranted. Our estimates are thus could serve as good references  
43  
44  
45 for countries facing such a rapid speed of aging to allocate medical and social welfare  
46  
47  
48 resources, including Taiwan or our neighbor country, Japan <sup>24</sup> or other European  
49  
50  
51 countries<sup>25</sup>.  
52  
53  
54  
55  
56  
57

58 In addition to older people, the prevalence of multimorbidity among the younger  
59  
60

1  
2  
3  
4 population yield special attention. As most researches in multimorbidity have focused  
5  
6  
7 on older adults<sup>26 27</sup>, evidence regarding this issue in young adults is very limited. In  
8  
9  
10 our study, the prevalence of multimorbidity (2+ diseases) in people aged 30-39, 40-49  
11  
12  
13 and 50-89 were 11.18%, 21.76%, and 37.75%, respectively, in 2013. This indicates  
14  
15  
16 the need for early intervention in those who already suffer from multimorbidity in  
17  
18  
19 their middle-ages as the intensity of multimorbidity gradually increase as shown in  
20  
21  
22 our study. Lifestyle factors such as smoking, drinking, exercise or diet in middle ages  
23  
24  
25 were reported to be associated with multimorbidity<sup>28</sup>.  
26  
27  
28  
29  
30

31 Most importantly, our study contributes to the understanding of the in-depth details of  
32  
33  
34 multimorbidity. In addition to revealing very distinct predominant diseases/deficits in  
35  
36  
37 men and women, we also reported the burden of multimorbidity in each common  
38  
39  
40 chronic condition. From a clinical perspective, our findings can help further strata the  
41  
42  
43 patients within a specific disease/deficit group. For example, care for patients with  
44  
45  
46 diabetes mellitus and with one other comorbid conditions should be very different  
47  
48  
49 from patients with diabetes mellitus and with four other comorbid conditions. From a  
50  
51  
52 policy perspective, our findings can help allocate medical resources more efficiently.  
53  
54  
55 Our previous studies also support this strata strategy (or identifying high-risk group)  
56  
57  
58 we found that the increase of diabetic complications was positively associated with  
59  
60

1  
2  
3  
4 increased risk of hospitalization and healthcare costs<sup>29 30</sup>.  
5  
6  
7  
8  
9

10 While we provide great epidemiologic information of age- and gender-specific, it  
11  
12 has some limitations due to the nature of claims data. First, we identified the  
13  
14 disease/deficit selection based on the diagnoses recorded in the outpatient or inpatient  
15  
16 visit. However, only up to three and up to five diagnoses were allowed to be recorded  
17  
18 in each outpatient or inpatient visit, the prevalence of multimorbidities may be  
19  
20 underestimated. Second, as we used the NHIRD, the estimation about the  
21  
22 multimorbidity in this study was from the perspective of the national insurance  
23  
24 system. Patients who pay out-of-pocket for their diseases are not recorded in the  
25  
26 NHIRD as well.  
27  
28  
29  
30  
31  
32  
33  
34  
35  
36  
37  
38  
39

40 Conclusively, our study is the first population-based study conducted in Taiwan  
41  
42 providing age- and gender-specific information on multimorbidity. The burden of  
43  
44 multimorbidity was increasing and becoming more complex in Taiwan. Providing for  
45  
46 the needs of individuals with multimorbidity requires collaborative work across health  
47  
48 care providers and may need to take into account age and gender disparities in  
49  
50 multimorbidity.  
51  
52  
53  
54  
55  
56  
57  
58  
59  
60

## Acknowledgements

We thank the National Health Insurance Administration (NHIA) and National Health Research Institutes (NHRI) for making the databases used in this study available. However, the content of this article does not represent any official position of the NHIA or NHRI. The authors have full access to all of the data in the study and take responsibility for the integrity of the data and the accuracy of the data analysis.

## Figure legends

**Figure 1. Prevalence of multi-morbidity in Taiwan by the number of common diseases or deficits\*, sex, age group, and year. (a) Men and women in 2003. (b) Men and women in 2013.**

**Figure 2. Distribution of the proportion of individuals with multimorbidity in Taiwan within common diseases or deficits by sex and year.**

## References

1. Huntley A, Johnson R, Purdy S, et al. Measures of multimorbidity and morbidity burden for use in primary care and community settings: a systematic review and guide. *Ann Fam Med* 2012;10(2):134-41.
2. Marengoni A, Angleman S, Melis R, et al. Aging with multimorbidity: a systematic

- 1  
2  
3 review of the literature. *Ageing Res Rev* 2011;10(4):430-39.
- 4  
5 3. Schram M, Frijters D, van de Lisdonk E, et al. Setting and registry characteristics  
6 affect the prevalence and nature of multimorbidity in the elderly. *J Clin*  
7 *Epidemiol* 2008;61(11):1104-12.
- 8  
9 4. Taylor A, Price K, Gill T, et al. Multimorbidity - not just an older person's issue.  
10 Results from an Australian biomedical study. *BMC Public Health*  
11 2010(10):718.
- 12  
13 5. Barnett K, Mercer S, Norbury M, et al. Epidemiology of multimorbidity and  
14 implications for health care, research, and medical education: a cross-  
15 sectional study. *Lancet* 2012;380(9836):37-43.
- 16  
17 6. Pefoyo A, Bronskill S, Gruneir A, et al. The increasing burden and complexity of  
18 multimorbidity. *BMC Public Health* 2015(15):415.
- 19  
20 7. van Oostrom S, Picavet H, de Bruin S, et al. Multimorbidity of chronic diseases and  
21 health care utilization in general practice. *BMC Fam Pract* 2014(15):61.
- 22  
23 8. van Oostrom S, Picavet H, van Gelder B, et al. Multimorbidity and comorbidity in  
24 the Dutch population - data from general practices. *BMC Public Health*  
25 2012(12):715.
- 26  
27 9. Araujo M, Silva M, Galvao T, et al. Prevalence and patterns of multimorbidity in  
28 Amazon Region of Brazil and associated determinants: a cross-sectional  
29 study. *BMJ Open* 2018;8(11):e023398.
- 30  
31 10. Brett T, Arnold-Reed D, Popescu A, et al. Multimorbidity in patients attending 2  
32 Australian primary care practices. *Ann Fam Med* 2013;11(6):535-42.
- 33  
34 11. Britt H, Harrison C, Miller G, et al. Prevalence and patterns of multimorbidity in  
35 Australia. *Med J Aust* 2008;189(2):72-77.
- 36  
37 12. Excoffier S, Herzig L, N'Goran A, et al. Prevalence of multimorbidity in general  
38 practice: a cross-sectional study within the Swiss Sentinel Surveillance System  
39 (Sentinella). *BMJ Open* 2018;8(3):e019616.
- 40  
41 13. Harrison C, Henderson J, Miller G, et al. The prevalence of complex  
42 multimorbidity in Australia. *Aust N Z J Public Health* 2016;40(3):239-44.
- 43  
44 14. Harrison C, Henderson J, Miller G, et al. The prevalence of diagnosed chronic  
45 conditions and multimorbidity in Australia: A method for estimating  
46 population prevalence from general practice patient encounter data. *PLoS*  
47 *One* 2017;12(3):e0172935.
- 48  
49 15. Cassell A, Edwards D, Harshfield A, et al. The epidemiology of multimorbidity in  
50 primary care: a retrospective cohort study. *Br J Gen Pract* 2018;68(669):e245-  
51 e51.
- 52  
53 16. Stanley J, Semper K, Millar E, et al. Epidemiology of multimorbidity in New  
54 Zealand: a cross-sectional study using national-level hospital and  
55  
56  
57  
58  
59  
60



- 1  
2  
3 pharmaceutical data. *BMJ Open* 2018;8(5):e021689.  
4  
5 17. Hsiao F, Yang C, Huang Y, et al. Using Taiwan's national health insurance research  
6 databases for pharmacoepidemiology research. *J Food Drug Anal*  
7 2007;15(2):99-108.  
8  
9 18. National Health Insurance Research Database, Taiwan [Available from:  
10 <http://nhird.nhri.org.tw/en/index.htm>. accessed August 22 2018.  
11  
12 19. Lenzi J, Avaldi V, Rucci P, et al. Burden of multimorbidity in relation to age,  
13 gender and immigrant status: a cross-sectional study based on administrative  
14 data. *BMJ Open* 2016;6(12):e012812.  
15  
16 20. Wen Y, Chen L, Hsiao F. Predicting mortality and hospitalization of older adults by  
17 the multimorbidity frailty index. *PLoS One* 2017;12(11):e0187825.  
18  
19 21. Lu W, Lee W, Chen L, et al. Comparisons of annual health care utilization, drug  
20 consumption, and medical expenditure between the elderly and general  
21 population in Taiwan. *J Clin Gerontol Geriatr* 2016;7(2):44-47.  
22  
23 22. National Development Council. Population Projections for R.O.C. (Taiwan):2014-  
24 2060. [Available from:  
25 [https://www.ndc.gov.tw/Content\\_List.aspx?n=84223C65B6F94D72](https://www.ndc.gov.tw/Content_List.aspx?n=84223C65B6F94D72) accessed  
26 November 21 2018.  
27  
28 23. Arai H, Ouchi Y, Toba K, et al. Japan as the front-runner of super-aged societies:  
29 Perspectives from medicine and medical care in Japan. *Geriatr Gerontol Int*  
30 2015;15(6):673-87.  
31  
32 24. Arai H, Ouchi Y, Yokode M, et al. Toward the realization of a better aged society:  
33 messages from gerontology and geriatrics. *Geriatr Gerontol Int*  
34 2012;12(1):16-22.  
35  
36 25. Perales J, Martin S, Ayuso-Mateos J, et al. Factors associated with active aging in  
37 Finland, Poland, and Spain. *Int Psychogeriatr* 2014;26(8):1363-75.  
38  
39 26. Uijen A, van de Lisdonk E. Multimorbidity in primary care: prevalence and trend  
40 over the last 20 years. *Eur J Gen Pract* 2008;14(Suppl 1):28-32.  
41  
42 27. van den Akker M, Buntinx F, Metsemakers J, et al. Multimorbidity in general  
43 practice: prevalence, incidence, and determinants of co-occurring chronic  
44 and recurrent diseases. *J Clin Epidemiol* 1998;51(5):367-75.  
45  
46 28. Fortin M, Haggerty J, Almirall J, et al. Lifestyle factors and multimorbidity: a cross  
47 sectional study. *BMC Public Health* 2014;14:686.  
48  
49 29. Chen H, Hsiao F. Risk of hospitalization and healthcare cost associated with  
50 Diabetes Complication Severity Index in Taiwan's National Health Insurance  
51 Research Database. *J Diabetes Complications* 2014;28(5):612-16.  
52  
53 30. Chen H, Hsu W, Hsiao F. Changes in prevalence of diabetic complications and  
54 associated healthcare costs during a 10-year follow-up period among a  
55  
56  
57  
58  
59  
60

1  
2  
3 nationwide diabetic cohort. *J Diabetes Complications* 2015;29(4):523-28.  
4  
5  
6  
7  
8  
9  
10  
11  
12  
13  
14  
15  
16  
17  
18  
19  
20  
21  
22  
23  
24  
25  
26  
27  
28  
29  
30  
31  
32  
33  
34  
35  
36  
37  
38  
39  
40  
41  
42  
43  
44  
45  
46  
47  
48  
49  
50  
51  
52  
53  
54  
55  
56  
57  
58  
59  
60

For peer review only

**Table 1. Prevalence of multi-morbidity in Taiwan by number of common diseases or deficits\*, age group, and year**

| <b>2003</b>       |                             |                                                   |                                                                  |          |          |           |  |
|-------------------|-----------------------------|---------------------------------------------------|------------------------------------------------------------------|----------|----------|-----------|--|
| <b>Age groups</b> | <b>Taiwanese Population</b> | <b>Prevalence of at least one disease/deficit</b> | <b>Prevalence of multimorbidity, by degree of multimorbidity</b> |          |          |           |  |
|                   |                             |                                                   | <b>2</b>                                                         | <b>3</b> | <b>4</b> | <b>5+</b> |  |
| 20-29             | 285,406                     | 16.74                                             | 4.01                                                             | 1.15     | 0.36     | 0.12      |  |
| 30-39             | 273,713                     | 24.09                                             | 8.04                                                             | 2.86     | 1.03     | 0.37      |  |
| 40-49             | 269,568                     | 35.91                                             | 16.01                                                            | 7.08     | 2.92     | 1.12      |  |
| 50-59             | 175,456                     | 51.70                                             | 30.15                                                            | 16.49    | 8.00     | 3.57      |  |
| 60-69             | 114,876                     | 66.52                                             | 47.08                                                            | 30.39    | 17.13    | 8.70      |  |
| 70-79             | 74,756                      | 77.86                                             | 62.40                                                            | 45.66    | 29.10    | 16.75     |  |
| 80-89             | 20,002                      | 78.05                                             | 64.32                                                            | 48.74    | 32.39    | 19.58     |  |
| 90+               | 1,946                       | 62.23                                             | 45.68                                                            | 33.04    | 21.12    | 12.69     |  |
| All               | 1,215,723                   | 37.23                                             | 20.07                                                            | 11.40    | 6.09     | 3.07      |  |
| <b>2013</b>       |                             |                                                   |                                                                  |          |          |           |  |
| <b>Age groups</b> | <b>Taiwanese Population</b> | <b>Prevalence of at least one disease/deficit</b> | <b>Prevalence of multimorbidity, by degree of multimorbidity</b> |          |          |           |  |
|                   |                             |                                                   | <b>2</b>                                                         | <b>3</b> | <b>4</b> | <b>5+</b> |  |
| 20-29             | 245,613                     | 19.85                                             | 5.21                                                             | 1.49     | 0.47     | 0.15      |  |
| 30-39             | 295,797                     | 30.49                                             | 11.18                                                            | 4.10     | 1.55     | 0.60      |  |
| 40-49             | 277,889                     | 43.45                                             | 21.76                                                            | 10.08    | 4.35     | 1.83      |  |
| 50-59             | 272,719                     | 59.90                                             | 37.75                                                            | 20.87    | 10.24    | 4.71      |  |
| 60-69             | 173,213                     | 75.39                                             | 56.84                                                            | 37.49    | 21.74    | 11.70     |  |
| 70-79             | 102,826                     | 87.53                                             | 74.64                                                            | 57.04    | 38.44    | 23.60     |  |
| 80-89             | 52,978                      | 92.01                                             | 82.64                                                            | 68.10    | 49.71    | 33.06     |  |
| 90+               | 8,492                       | 90.44                                             | 80.96                                                            | 66.52    | 48.39    | 32.54     |  |
| All               | 1,429,527                   | 48.97                                             | 30.44                                                            | 18.61    | 10.73    | 5.94      |  |

\*Hypertension, diabetes, congestive heart failure, coronary syndrome, cardiac dysrhythmias, peripheral vascular disease, cerebrovascular disease, chronic pulmonary disease, renal disease, liver disease, dementia, other neurological disorders, digestive disorder, osteoporosis, arthritis (including rheumatoid arthritis), anxiety dissociative and somatoform disorders, bipolar disorder, depression, schizophrenia and psychotic disorders, and cancer

**Table 2. Prevalence of 20 common diseases or deficits in Taiwan, by age group and year**

| Disease/ deficit                    | Year        | Number with condition (prevalence) | Prevalence of each disease/ deficit, by age group |       |       |       |       |       |       |       |
|-------------------------------------|-------------|------------------------------------|---------------------------------------------------|-------|-------|-------|-------|-------|-------|-------|
|                                     |             |                                    | 20-29                                             | 30-39 | 40-49 | 50-59 | 60-69 | 70-79 | 80-89 | 90+   |
| <b>Hypertension</b>                 | <b>2003</b> | 126,651(10.42)                     | 0.22                                              | 1.38  | 6.31  | 17.11 | 29.91 | 42.36 | 43.26 | 28.78 |
|                                     | <b>2013</b> | 260,198(18.20)                     | 0.43                                              | 2.38  | 9.54  | 22.91 | 39.64 | 55.39 | 61.71 | 56.64 |
| <b>Diabetes</b>                     | <b>2003</b> | 56,627(4.66)                       | 0.20                                              | 0.77  | 3.00  | 8.51  | 14.04 | 16.31 | 12.51 | 5.86  |
|                                     | <b>2013</b> | 126,991(8.88)                      | 0.35                                              | 1.27  | 4.50  | 11.47 | 21.10 | 26.39 | 25.23 | 18.38 |
| <b>Congestive heart failure</b>     | <b>2003</b> | 44,622(3.67)                       | 0.06                                              | 0.38  | 1.80  | 5.35  | 10.43 | 17.25 | 19.95 | 15.88 |
|                                     | <b>2013</b> | 71,026(4.97)                       | 0.09                                              | 0.45  | 1.87  | 4.99  | 10.10 | 17.19 | 24.78 | 28.24 |
| <b>Coronary syndrome</b>            | <b>2003</b> | 35,539(2.92)                       | 0.04                                              | 0.25  | 1.19  | 3.98  | 8.75  | 14.82 | 16.05 | 11.20 |
|                                     | <b>2013</b> | 60,367(4.22)                       | 0.05                                              | 0.27  | 1.43  | 4.19  | 9.38  | 15.29 | 19.72 | 18.86 |
| <b>Cardiac dysrhythmias</b>         | <b>2003</b> | 14,337(1.18)                       | 0.14                                              | 0.31  | 0.69  | 1.47  | 2.89  | 5.24  | 6.67  | 5.29  |
|                                     | <b>2013</b> | 29,098(2.04)                       | 0.18                                              | 0.32  | 0.83  | 1.79  | 3.76  | 6.95  | 10.88 | 12.69 |
| <b>Peripheral vascular disease</b>  | <b>2003</b> | 14,873(1.22)                       | 0.07                                              | 0.13  | 0.44  | 1.23  | 3.34  | 7.10  | 8.70  | 4.78  |
|                                     | <b>2013</b> | 28,562(2.00)                       | 0.08                                              | 0.17  | 0.48  | 1.45  | 3.92  | 8.66  | 11.34 | 9.89  |
| <b>Cerebrovascular disease</b>      | <b>2003</b> | 28,098(2.31)                       | 0.14                                              | 0.25  | 0.86  | 2.74  | 6.59  | 12.09 | 15.26 | 11.51 |
|                                     | <b>2013</b> | 56,770(3.97)                       | 0.18                                              | 0.38  | 1.12  | 3.24  | 7.82  | 15.35 | 22.51 | 23.85 |
| <b>Chronic pulmonary disease</b>    | <b>2003</b> | 37,897(3.12)                       | 0.78                                              | 1.32  | 1.95  | 3.46  | 7.25  | 12.22 | 15.14 | 12.85 |
|                                     | <b>2013</b> | 50,705(3.55)                       | 0.74                                              | 1.26  | 1.80  | 3.02  | 5.77  | 10.73 | 17.17 | 21.15 |
| <b>Renal disease</b>                | <b>2003</b> | 13,999(1.15)                       | 0.18                                              | 0.34  | 0.77  | 1.57  | 2.80  | 4.54  | 5.07  | 3.44  |
|                                     | <b>2013</b> | 38,748(2.71)                       | 0.18                                              | 0.44  | 1.06  | 2.44  | 5.19  | 9.64  | 13.79 | 14.13 |
| <b>Liver disease</b>                | <b>2003</b> | 43,555(3.58)                       | 1.39                                              | 2.58  | 4.03  | 5.53  | 6.23  | 5.44  | 3.41  | 1.64  |
|                                     | <b>2013</b> | 71,015(4.97)                       | 0.79                                              | 2.88  | 5.13  | 7.28  | 8.56  | 8.05  | 5.69  | 4.03  |
| <b>Dementia</b>                     | <b>2003</b> | 5,194(0.43)                        | 0.10                                              | 0.12  | 0.17  | 0.27  | 0.72  | 2.24  | 5.06  | 6.27  |
|                                     | <b>2013</b> | 18,869(1.32)                       | 0.13                                              | 0.19  | 0.30  | 0.51  | 1.27  | 4.89  | 12.77 | 20.54 |
| <b>Other neurological disorders</b> | <b>2003</b> | 124,029(10.20)                     | 4.25                                              | 6.84  | 9.44  | 13.12 | 18.24 | 24.21 | 26.53 | 17.78 |
|                                     | <b>2013</b> | 217,307(15.20)                     | 6.54                                              | 10.37 | 13.29 | 16.90 | 21.42 | 29.04 | 33.85 | 31.03 |

**Table 2. Prevalence of 20 common diseases or deficits in Taiwan, by age group and year (cont'd)**

| Disease/ deficit                                      | Year        | Number with condition (prevalence) | Prevalence of each disease/ deficit, by age group |       |       |       |       |       |       |       |
|-------------------------------------------------------|-------------|------------------------------------|---------------------------------------------------|-------|-------|-------|-------|-------|-------|-------|
|                                                       |             |                                    | 20-29                                             | 30-39 | 40-49 | 50-59 | 60-69 | 70-79 | 80-89 | 90+   |
| <b>Digestive disorder</b>                             | <b>2003</b> | 152,161(12.52)                     | 6.81                                              | 8.54  | 11.19 | 14.94 | 21.03 | 29.22 | 32.39 | 25.95 |
|                                                       | <b>2013</b> | 227,327(15.90)                     | 8.41                                              | 11.15 | 13.40 | 17.09 | 22.01 | 29.06 | 35.24 | 37.48 |
| <b>Osteoporosis</b>                                   | <b>2003</b> | 14,732(1.21)                       | 0.09                                              | 0.13  | 0.49  | 2.04  | 3.59  | 5.02  | 6.08  | 5.45  |
|                                                       | <b>2013</b> | 17,026(1.19)                       | 0.07                                              | 0.11  | 0.23  | 0.74  | 2.10  | 5.23  | 7.67  | 9.15  |
| <b>Arthritis (including rheumatoid arthritis)</b>     | <b>2003</b> | 149,434(12.29)                     | 3.87                                              | 6.34  | 11.05 | 18.01 | 25.54 | 31.95 | 30.18 | 19.63 |
|                                                       | <b>2013</b> | 226,844(15.87)                     | 4.18                                              | 7.28  | 12.01 | 19.46 | 27.70 | 37.45 | 37.03 | 29.30 |
| <b>Anxiety, dissociative and somatoform disorders</b> | <b>2003</b> | 52,029(4.28)                       | 1.27                                              | 2.48  | 4.17  | 6.34  | 8.48  | 9.99  | 9.49  | 5.91  |
|                                                       | <b>2013</b> | 89,053(6.23)                       | 1.69                                              | 3.45  | 5.82  | 8.00  | 10.29 | 11.91 | 11.18 | 8.44  |
| <b>Bipolar disorder</b>                               | <b>2003</b> | 8,251(0.68)                        | 0.44                                              | 0.59  | 0.72  | 0.84  | 0.89  | 1.03  | 0.89  | 0.51  |
|                                                       | <b>2013</b> | 15,439(1.08)                       | 0.51                                              | 0.80  | 1.25  | 1.30  | 1.44  | 1.50  | 1.32  | 0.92  |
| <b>Depression</b>                                     | <b>2003</b> | 11,630(0.96)                       | 0.64                                              | 0.82  | 0.97  | 1.14  | 1.27  | 1.51  | 1.61  | 1.13  |
|                                                       | <b>2013</b> | 24,712(1.73)                       | 0.86                                              | 1.30  | 1.89  | 2.00  | 2.24  | 2.52  | 2.59  | 2.25  |
| <b>Schizophrenia and psychotic disorders</b>          | <b>2003</b> | 7,472(0.61)                        | 0.48                                              | 0.80  | 0.74  | 0.57  | 0.43  | 0.40  | 0.55  | 0.51  |
|                                                       | <b>2013</b> | 11,624(0.81)                       | 0.42                                              | 0.82  | 1.10  | 1.00  | 0.77  | 0.65  | 0.55  | 0.67  |
| <b>Cancer</b>                                         | <b>2003</b> | 37,438(3.08)                       | 1.26                                              | 2.22  | 3.77  | 4.11  | 4.47  | 5.50  | 5.46  | 2.93  |
|                                                       | <b>2013</b> | 83,065(5.81)                       | 1.36                                              | 2.97  | 5.68  | 7.22  | 9.19  | 11.54 | 12.57 | 12.16 |

**Table 3. Prevalence of 20 common diseases or deficits in Taiwan, by sex, age group and year**

| Disease/ deficit            | Year | Prevalence |        | Prevalence of each disease/ deficit, by age group |      |       |      |       |      |       |       |       |       |       |       |       |       |       |       |
|-----------------------------|------|------------|--------|---------------------------------------------------|------|-------|------|-------|------|-------|-------|-------|-------|-------|-------|-------|-------|-------|-------|
|                             |      |            |        | 20-29                                             |      | 30-39 |      | 40-49 |      | 50-59 |       | 60-69 |       | 70-79 |       | 80-89 |       | 90+   |       |
|                             |      | Male       | Female | M                                                 | F    | M     | F    | M     | F    | M     | F     | M     | F     | M     | F     | M     | F     | M     | F     |
| Hypertension                | 2003 | 10.52      | 10.33  | 0.33                                              | 0.11 | 1.90  | 0.92 | 7.29  | 5.42 | 17.13 | 17.09 | 27.66 | 31.83 | 39.89 | 44.96 | 41.16 | 45.18 | 29.55 | 28.31 |
|                             | 2013 | 19.40      | 17.13  | 0.68                                              | 0.21 | 3.58  | 1.35 | 12.67 | 6.71 | 25.93 | 20.10 | 40.55 | 38.81 | 51.88 | 58.30 | 58.03 | 65.22 | 54.02 | 58.70 |
| Diabetes                    | 2003 | 4.77       | 4.56   | 0.21                                              | 0.19 | 1.05  | 0.51 | 3.73  | 2.34 | 9.15  | 7.94  | 13.07 | 14.86 | 14.10 | 18.64 | 11.47 | 13.47 | 5.75  | 5.93  |
|                             | 2013 | 9.57       | 8.26   | 0.40                                              | 0.31 | 1.75  | 0.86 | 6.18  | 2.97 | 13.52 | 9.56  | 21.87 | 20.40 | 24.50 | 27.96 | 22.52 | 27.81 | 17.60 | 18.99 |
| Congestive heart failure    | 2003 | 3.71       | 3.63   | 0.09                                              | 0.03 | 0.54  | 0.24 | 2.12  | 1.51 | 5.48  | 5.25  | 9.58  | 11.16 | 16.27 | 18.28 | 19.34 | 20.51 | 17.10 | 15.14 |
|                             | 2013 | 5.24       | 4.72   | 0.14                                              | 0.04 | 0.68  | 0.25 | 2.56  | 1.25 | 5.82  | 4.21  | 10.67 | 9.58  | 16.02 | 18.15 | 23.37 | 26.13 | 27.04 | 29.18 |
| Coronary syndrome           | 2003 | 3.21       | 2.67   | 0.05                                              | 0.03 | 0.33  | 0.17 | 1.51  | 0.89 | 4.47  | 3.55  | 8.81  | 8.70  | 15.53 | 14.07 | 16.88 | 15.30 | 11.76 | 10.86 |
|                             | 2013 | 5.00       | 3.52   | 0.06                                              | 0.04 | 0.44  | 0.13 | 2.14  | 0.78 | 5.49  | 2.99  | 11.24 | 7.71  | 16.41 | 14.36 | 20.94 | 18.55 | 20.42 | 17.65 |
| Cardiac dysrhythmias        | 2003 | 1.19       | 1.17   | 0.13                                              | 0.15 | 0.29  | 0.33 | 0.64  | 0.73 | 1.39  | 1.54  | 2.90  | 2.88  | 5.40  | 5.06  | 6.85  | 6.51  | 6.57  | 4.53  |
|                             | 2013 | 2.10       | 1.98   | 0.16                                              | 0.20 | 0.31  | 0.34 | 0.85  | 0.81 | 1.83  | 1.77  | 3.94  | 3.60  | 7.08  | 6.84  | 11.69 | 10.11 | 12.81 | 12.61 |
| Peripheral vascular disease | 2003 | 1.23       | 1.22   | 0.08                                              | 0.06 | 0.16  | 0.11 | 0.47  | 0.41 | 1.20  | 1.25  | 3.01  | 3.62  | 7.01  | 7.19  | 8.97  | 8.46  | 5.61  | 4.28  |
|                             | 2013 | 2.00       | 2.00   | 0.06                                              | 0.10 | 0.18  | 0.16 | 0.54  | 0.44 | 1.60  | 1.32  | 3.83  | 4.00  | 8.06  | 9.16  | 11.76 | 10.95 | 11.25 | 8.82  |
| Cerebrovascular disease     | 2003 | 2.61       | 2.04   | 0.16                                              | 0.12 | 0.34  | 0.18 | 1.07  | 0.67 | 3.18  | 2.36  | 7.05  | 6.19  | 13.01 | 11.11 | 16.29 | 14.31 | 14.09 | 9.96  |
|                             | 2013 | 4.54       | 3.46   | 0.19                                              | 0.17 | 0.47  | 0.29 | 1.47  | 0.80 | 4.05  | 2.50  | 9.15  | 6.61  | 16.65 | 14.28 | 24.45 | 20.67 | 24.81 | 23.09 |

**Table 3. Prevalence of 20 common diseases or deficits in Taiwan, by sex, age group and year (cont'd)**

| Disease/ deficit             | Year | Prevalence |        | Prevalence of each disease/ deficit, by age group |      |       |       |       |       |       |       |       |       |       |       |       |       |       |       |
|------------------------------|------|------------|--------|---------------------------------------------------|------|-------|-------|-------|-------|-------|-------|-------|-------|-------|-------|-------|-------|-------|-------|
|                              |      |            |        | 20-29                                             |      | 30-39 |       | 40-49 |       | 50-59 |       | 60-69 |       | 70-79 |       | 80-89 |       | 90+   |       |
|                              |      | Male       | Female | M                                                 | F    | M     | F     | M     | F     | M     | F     | M     | F     | M     | F     | M     | F     | M     | F     |
| Chronic pulmonary disease    | 2003 | 3.51       | 2.76   | 0.80                                              | 0.76 | 1.24  | 1.39  | 1.99  | 1.93  | 3.50  | 3.41  | 8.02  | 6.59  | 15.19 | 9.08  | 19.80 | 10.86 | 17.51 | 10.04 |
|                              | 2013 | 4.00       | 3.14   | 0.71                                              | 0.76 | 1.16  | 1.34  | 1.75  | 1.85  | 3.09  | 2.96  | 6.52  | 5.10  | 13.26 | 8.62  | 21.96 | 12.60 | 26.98 | 16.58 |
| Renal disease                | 2003 | 1.29       | 1.03   | 0.22                                              | 0.15 | 0.42  | 0.27  | 0.86  | 0.68  | 1.68  | 1.48  | 3.02  | 2.62  | 4.90  | 4.16  | 6.09  | 4.14  | 4.51  | 2.80  |
|                              | 2013 | 3.26       | 2.22   | 0.21                                              | 0.15 | 0.58  | 0.32  | 1.42  | 0.72  | 3.04  | 1.89  | 6.25  | 4.23  | 11.26 | 8.29  | 15.84 | 11.85 | 16.96 | 11.91 |
| Liver disease                | 2003 | 4.61       | 2.66   | 2.12                                              | 0.76 | 3.95  | 1.36  | 5.64  | 2.56  | 6.38  | 4.78  | 6.70  | 5.83  | 5.59  | 5.28  | 3.90  | 2.96  | 2.19  | 1.32  |
|                              | 2013 | 6.20       | 3.86   | 1.12                                              | 0.49 | 4.30  | 1.66  | 7.35  | 3.12  | 8.92  | 5.76  | 9.21  | 7.97  | 8.49  | 7.68  | 6.13  | 5.28  | 4.66  | 3.53  |
| Dementia                     | 2003 | 0.46       | 0.39   | 0.15                                              | 0.06 | 0.18  | 0.07  | 0.21  | 0.13  | 0.32  | 0.23  | 0.75  | 0.70  | 2.14  | 2.35  | 4.82  | 5.28  | 4.24  | 7.49  |
|                              | 2013 | 1.31       | 1.33   | 0.16                                              | 0.10 | 0.26  | 0.14  | 0.41  | 0.20  | 0.63  | 0.41  | 1.31  | 1.23  | 4.52  | 5.20  | 11.70 | 13.79 | 18.81 | 21.89 |
| Other neurological disorders | 2003 | 8.00       | 12.17  | 3.29                                              | 5.08 | 5.24  | 8.27  | 6.90  | 11.76 | 9.31  | 16.48 | 14.62 | 21.32 | 21.26 | 27.32 | 23.99 | 28.86 | 17.10 | 18.19 |
|                              | 2013 | 12.02      | 18.05  | 4.74                                              | 8.19 | 7.79  | 12.59 | 10.02 | 16.25 | 12.66 | 20.81 | 16.84 | 25.58 | 25.34 | 32.12 | 32.25 | 35.37 | 30.73 | 31.26 |

**Table 3. Prevalence of 20 common diseases or deficits in Taiwan, by sex, age group and year (cont'd)**

| Disease/ deficit                                  | Year | Prevalence |        | Prevalence of each disease/ deficit, by age group |       |       |       |       |       |       |       |       |       |       |       |       |       |       |       |
|---------------------------------------------------|------|------------|--------|---------------------------------------------------|-------|-------|-------|-------|-------|-------|-------|-------|-------|-------|-------|-------|-------|-------|-------|
|                                                   |      |            |        | 20-29                                             |       | 30-39 |       | 40-49 |       | 50-59 |       | 60-69 |       | 70-79 |       | 80-89 |       | 90+   |       |
|                                                   |      | Male       | Female | M                                                 | F     | M     | F     | M     | F     | M     | F     | M     | F     | M     | F     | M     | F     | M     | F     |
| Digestive disorder                                | 2003 | 11.62      | 13.32  | 4.92                                              | 8.46  | 7.63  | 9.35  | 10.53 | 11.79 | 13.78 | 15.96 | 19.84 | 22.04 | 29.87 | 28.54 | 34.65 | 30.32 | 28.04 | 24.69 |
|                                                   | 2013 | 14.01      | 17.60  | 5.65                                              | 10.93 | 8.59  | 13.34 | 11.63 | 15.00 | 15.14 | 18.91 | 20.14 | 23.69 | 28.32 | 29.67 | 37.55 | 33.04 | 41.88 | 34.03 |
| Osteoporosis                                      | 2003 | 0.45       | 1.89   | 0.13                                              | 0.05  | 0.14  | 0.13  | 0.26  | 0.70  | 0.41  | 3.48  | 0.91  | 5.87  | 2.07  | 8.14  | 2.75  | 9.14  | 4.10  | 6.26  |
|                                                   | 2013 | 0.58       | 1.74   | 0.09                                              | 0.05  | 0.15  | 0.08  | 0.26  | 0.21  | 0.45  | 1.02  | 0.76  | 3.31  | 1.98  | 7.93  | 3.72  | 11.43 | 5.25  | 12.21 |
| Arthritis (including<br>rheumatoid arthritis)     | 2003 | 12.26      | 12.32  | 4.81                                              | 3.05  | 7.46  | 5.35  | 11.49 | 10.65 | 16.09 | 19.70 | 22.43 | 28.20 | 30.16 | 33.85 | 29.71 | 30.61 | 22.85 | 17.70 |
|                                                   | 2013 | 15.32      | 16.36  | 4.89                                              | 3.53  | 8.75  | 6.03  | 12.75 | 11.34 | 18.01 | 20.80 | 24.02 | 31.04 | 32.67 | 41.43 | 35.62 | 38.37 | 30.49 | 28.36 |
| Anxiety, dissociative and<br>somatoform disorders | 2003 | 3.36       | 5.10   | 1.11                                              | 1.42  | 2.05  | 2.86  | 3.26  | 5.01  | 4.47  | 7.99  | 6.27  | 10.36 | 8.18  | 11.91 | 8.46  | 10.44 | 6.43  | 5.60  |
|                                                   | 2013 | 4.90       | 7.42   | 1.50                                              | 1.86  | 2.95  | 3.87  | 4.76  | 6.78  | 5.99  | 9.87  | 7.55  | 12.78 | 9.09  | 14.26 | 9.34  | 12.94 | 7.93  | 8.84  |
| Bipolar disorder                                  | 2003 | 0.55       | 0.79   | 0.43                                              | 0.45  | 0.44  | 0.72  | 0.55  | 0.87  | 0.63  | 1.02  | 0.72  | 1.03  | 0.87  | 1.20  | 0.76  | 1.02  | 0.55  | 0.49  |
|                                                   | 2013 | 0.84       | 1.29   | 0.51                                              | 0.51  | 0.65  | 0.93  | 0.95  | 1.52  | 0.97  | 1.62  | 1.04  | 1.79  | 1.10  | 1.84  | 1.09  | 1.54  | 0.99  | 0.86  |
| Depression                                        | 2003 | 0.80       | 1.10   | 0.66                                              | 0.62  | 0.65  | 0.98  | 0.76  | 1.15  | 0.86  | 1.39  | 1.00  | 1.50  | 1.32  | 1.71  | 1.44  | 1.77  | 0.82  | 1.32  |
|                                                   | 2013 | 1.42       | 2.00   | 0.87                                              | 0.84  | 1.11  | 1.47  | 1.56  | 2.19  | 1.56  | 2.42  | 1.70  | 2.73  | 1.96  | 2.98  | 2.23  | 2.93  | 2.20  | 2.29  |
| Schizophrenia and<br>psychotic disorders          | 2003 | 0.68       | 0.56   | 0.62                                              | 0.37  | 0.96  | 0.65  | 0.81  | 0.68  | 0.51  | 0.62  | 0.34  | 0.51  | 0.37  | 0.43  | 0.49  | 0.61  | 0.41  | 0.58  |
|                                                   | 2013 | 0.89       | 0.75   | 0.50                                              | 0.35  | 0.98  | 0.68  | 1.32  | 0.91  | 1.04  | 0.97  | 0.70  | 0.85  | 0.51  | 0.77  | 0.49  | 0.60  | 0.59  | 0.74  |
| Cancer                                            | 2003 | 2.21       | 3.85   | 0.90                                              | 1.58  | 1.22  | 3.11  | 1.80  | 5.56  | 2.80  | 5.26  | 4.26  | 4.66  | 6.22  | 4.73  | 6.82  | 4.21  | 4.38  | 2.06  |
|                                                   | 2013 | 5.06       | 6.49   | 1.02                                              | 1.67  | 1.82  | 3.95  | 3.41  | 7.73  | 5.76  | 8.57  | 9.09  | 9.29  | 13.37 | 10.02 | 15.81 | 9.49  | 16.21 | 8.99  |



**Figure 1. Prevalence of multi-morbidity in Taiwan by number of common diseases or deficits\*, sex, age group, and year**  
**(a) Men and women in 2003**

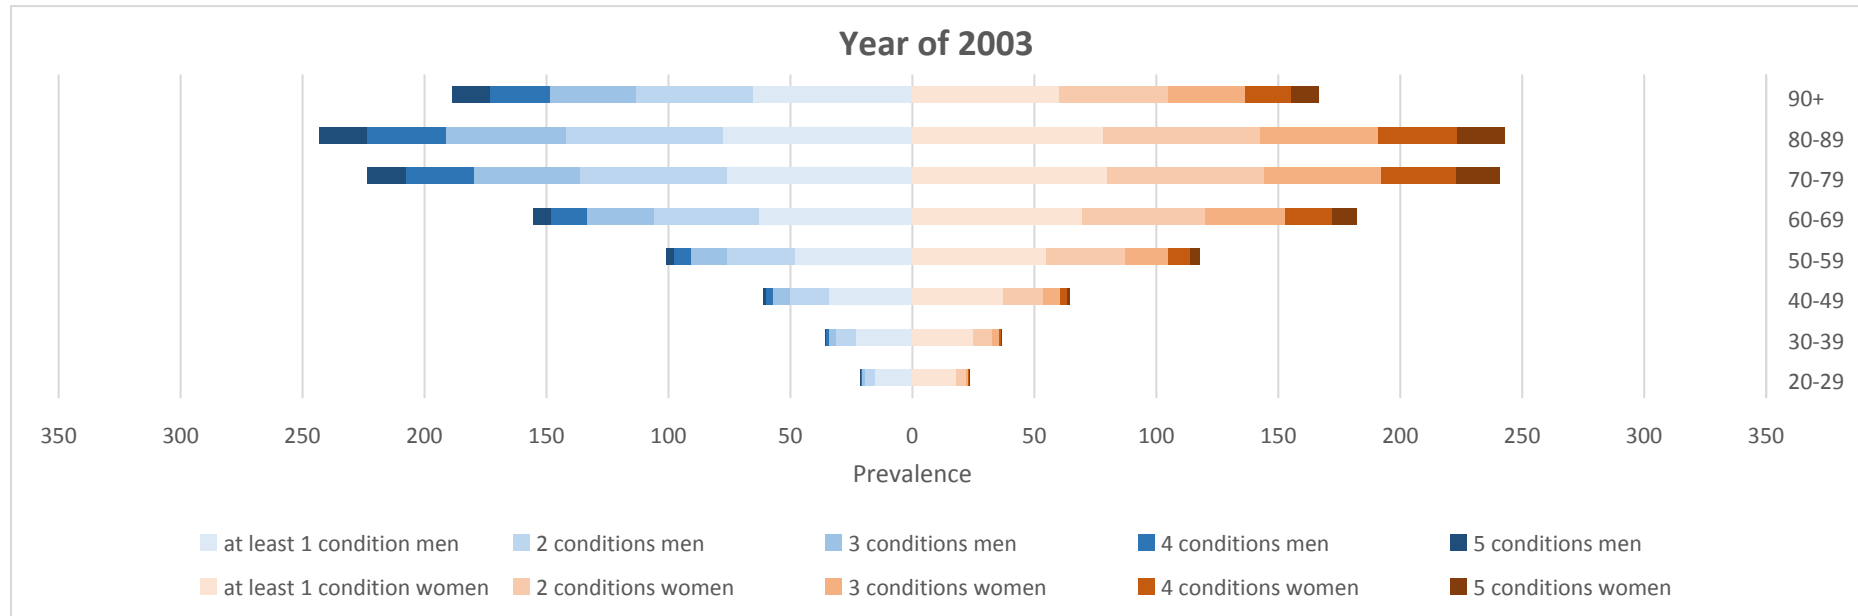

**(b) Men and women in 2013**

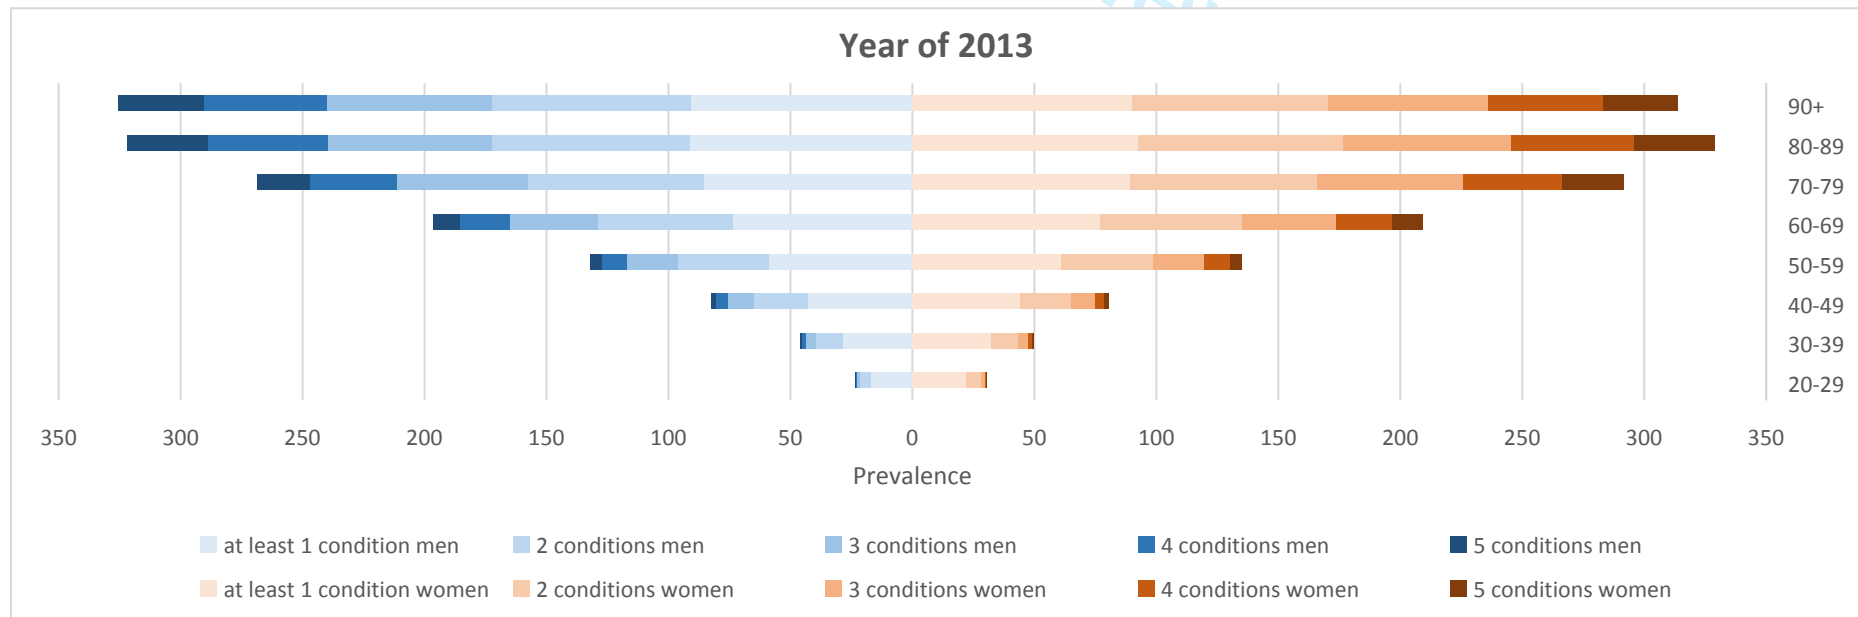

1 \*Hypertension, diabetes, congestive heart failure, coronary syndrome, cardiac dysrhythmias, peripheral vascular disease, cerebrovascular disease, chronic  
2 pulmonary disease, renal disease, liver disease, dementia, other neurological disorders, digestive disorder, osteoporosis, arthritis (including rheumatoid  
3 arthritis), anxiety dissociative and somatoform disorders, bipolar disorder, depression, schizophrenia and psychotic disorders, and cancer  
4  
5  
6  
7  
8  
9  
10  
11  
12  
13  
14  
15  
16  
17  
18  
19  
20  
21  
22  
23  
24  
25  
26  
27  
28  
29  
30  
31  
32  
33  
34  
35  
36  
37  
38  
39  
40  
41  
42  
43  
44  
45  
46

For peer review only

Figure 2. Distribution of the proportion of individuals with multimorbidity in Taiwan within common diseases or deficits by sex and year

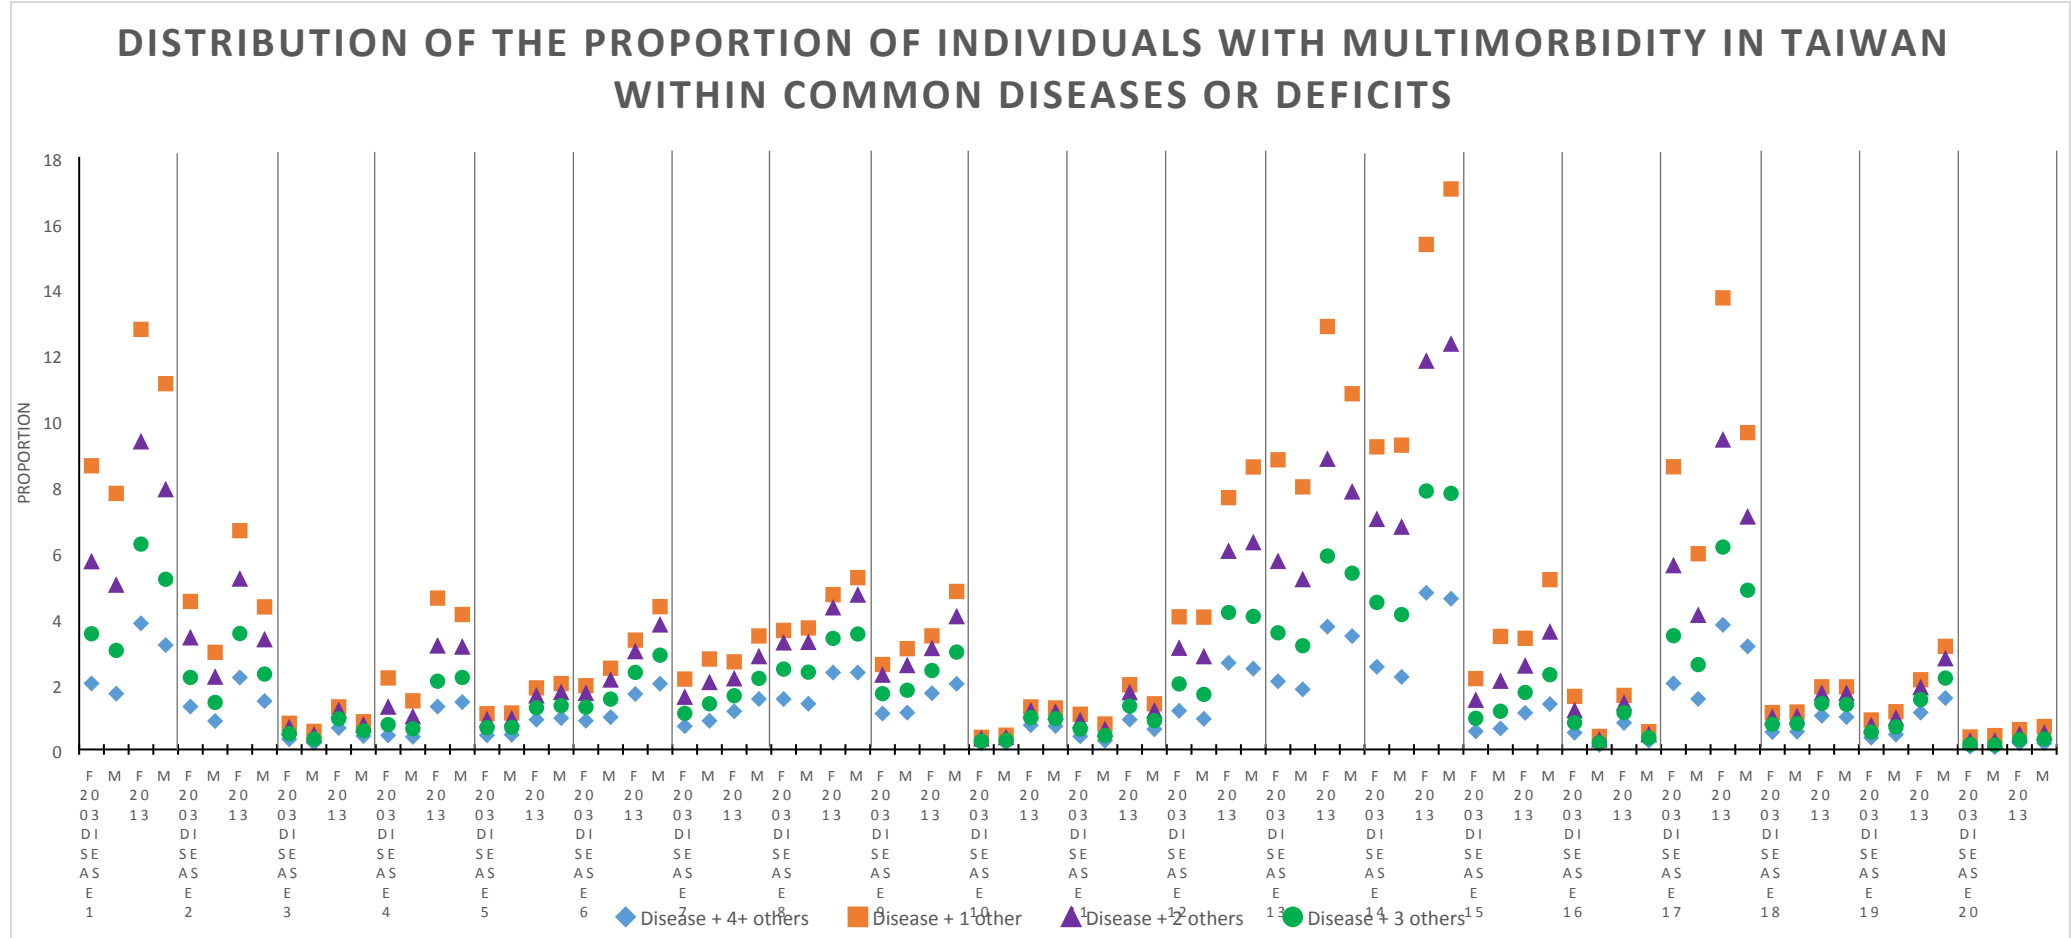

\*Disease 1: Anxiety, dissociative and somatoform disorders; Disease 2: Arthritis (including rheumatoid arthritis); Disease 3: Bipolar disorder; Disease 4: Cancer; Disease 5: Cardiac dysrhythmias; Disease 6: Cerebrovascular disease; Disease 7: Chronic pulmonary disease; Disease 8: Congestive heart failure; Disease 9: Coronary syndrome; Disease 10: Dementia; Disease 11: Depression; Disease 12: Diabetes; Disease 13: Digestive disorders; Disease 14: Hypertension; Disease 15: Liver disease; Disease 16: Osteoporosis; Disease 17: Other neurological disorders; Disease 18: Peripheral vascular disease; Disease 19: Renal disease; Disease 20: Schizophrenia and psychotic disorders.

Table S1. ICD-9-CM codes regarding the definition of 20 common diseases or deficits

| <b>Disease/ Deficit</b>                    | <b>ICD-9-CM code</b>                                                                                                                                                                                                                                                                                                                                                                    |
|--------------------------------------------|-----------------------------------------------------------------------------------------------------------------------------------------------------------------------------------------------------------------------------------------------------------------------------------------------------------------------------------------------------------------------------------------|
| Hypertension                               | 401, 402, 403, 404, 405                                                                                                                                                                                                                                                                                                                                                                 |
| Diabetes                                   | 250                                                                                                                                                                                                                                                                                                                                                                                     |
| Congestive heart failure                   | 39891, 40201, 40211, 40291, 40401, 40403, 40411, 40413, 40491, 40493, 4254, 4255, 4257, 4258, 4259, 428                                                                                                                                                                                                                                                                                 |
| Coronary syndrome                          | 410, 411, 412, 413, 414                                                                                                                                                                                                                                                                                                                                                                 |
| Cardiac dysrhythmias                       | 427                                                                                                                                                                                                                                                                                                                                                                                     |
| Peripheral vascular disease                | 0930, 4373, 4400, 4401, 44020, 44021, 44022, 44023, 44024, 44029, 44030, 44031, 44032, 4408, 4409, 44100, 44101, 44102, 44103, 4411, 4412, 4413, 4414, 4415, 4416, 4417, 4419, 4431, 44321, 44322, 44323, 44324, 44329, 44381, 44382, 44389, 4439, 4471, 5571, 5579, V434                                                                                                               |
| Cerebrovascular disease                    | 36234, 430, 431, 432, 43300, 43301, 43310, 43311, 43320, 43321, 43330, 43331, 43380, 43381, 43390, 43391, 434, 4350, 4351, 4352, 4353, 4358, 4359, 436, 437, 438                                                                                                                                                                                                                        |
| Chronic pulmonary disease                  | 4168, 4169, 490, 491, 492, 493, 4940, 4941, 4950, 4951, 4952, 4953, 4954, 4955, 4956, 4957, 4958, 4959, 496, 500, 501, 502, 503, 504, 505, 5064, 5081, 5088                                                                                                                                                                                                                             |
| Renal disease                              | 403, 404, 5820, 5821, 5822, 5824, 58281, 58289, 5829, 5830, 5831, 5832, 5834, 5836, 5837, 584, 585, 586, 5880, V420, V451, V560, V561, V562, V5631, V5632, V568                                                                                                                                                                                                                         |
| Liver disease                              | 07022, 07023, 07032, 07033, 07044, 07054, 0706, 0709, 570, 5710, 5711, 5712, 5713, 57140, 57141, 57149, 5715, 5716, 5718, 5719, 5733, 5734, 5738, 5739, V427, 4560, 4561, 45620, 45621, 5722, 5723, 5724, 5728                                                                                                                                                                          |
| Dementia                                   | 290, 2930, 2931, 29381, 29382, 29383, 29384, 29389, 2939, 2940, 2941, 2948, 2949, 3100, 3101, 3102, 3108, 3109, 3310, 3311, 3312                                                                                                                                                                                                                                                        |
| Other neurological disorders               | 3319, 332, 3334, 3335, 33392, 3340, 3341, 3342, 3343, 3344, 3348, 3349, 3350, 33510, 33511, 33519, 33520, 33521, 33522, 33523, 33524, 33529, 3358, 3359, 3362, 340, 3410, 3411, 34120, 34121, 34122, 3418, 3419, 34500, 34501, 34510, 34511, 3452, 3453, 34540, 34541, 34550, 34551, 34560, 34561, 34570, 34571, 34580, 34581, 34590, 34591, 3481, 3483, 34830, 34831, 34839, 780, 7843 |
| Digestive disorder                         | 530, 531, 532, 53300, 53301, 53310, 53311, 53320, 53321, 53330, 53331, 53340, 53341, 53350, 53351, 53360, 53361, 53370, 53371, 53390, 53391, 53400, 53401, 53410, 53411, 53420, 53421, 53430, 53431, 53440, 53441, 53450, 53451, 53460, 53461, 53470, 53471, 53490, 53491, 536, 558, 564                                                                                                |
| Osteoporosis                               | 733                                                                                                                                                                                                                                                                                                                                                                                     |
| Arthritis (including rheumatoid arthritis) | 274, 710, 711, 714, 715, 716, 718, 720, 727, 728, 729, 739                                                                                                                                                                                                                                                                                                                              |

Table S1. ICD-9-CM codes regarding the definition of 20 common diseases or deficits (continued)

| <b>Disease/ Deficit</b>                        | <b>ICD-9-CM code</b>                                                                                                                                                                                                                   |
|------------------------------------------------|----------------------------------------------------------------------------------------------------------------------------------------------------------------------------------------------------------------------------------------|
| Anxiety, dissociative and somatoform disorders | 30000-30002, 30009-30016, 30019-30023, 30029, 3003, 3005-3007, 30081, 30082, 30089, 3009, 3062, 3069, 30740-30749, 3080-3084, 3089, 316                                                                                                |
| Bipolar disorder                               | 29600-29606, 29610-29616, 29640-29646, 29650-29656, 29660-29666, 2967, 29680-29682, 29689                                                                                                                                              |
| Depression                                     | 29620-29626, 29630-29636, 29690, 29699, 2980, 3090, 3091, 311                                                                                                                                                                          |
| Schizophrenia and psychotic disorders          | 29500-29505, 29510-29515, 29520-29525, 29530-29535, 29540-29545, 29550-29555, 29560-29565, 29570-29575, 29580-29585, 29590-29595, 2970-2973, 2978, 2979, 2981-2984, 2988, 2989, 29900, 29901, 29910, 29911, 29980, 29981, 29990, 29991 |
| Cancer                                         | 140-239                                                                                                                                                                                                                                |

Figure S1. Prevalence of multi-morbidity in Taiwan by number of common diseases or deficits\*, age group, and year

(a) Year of 2003

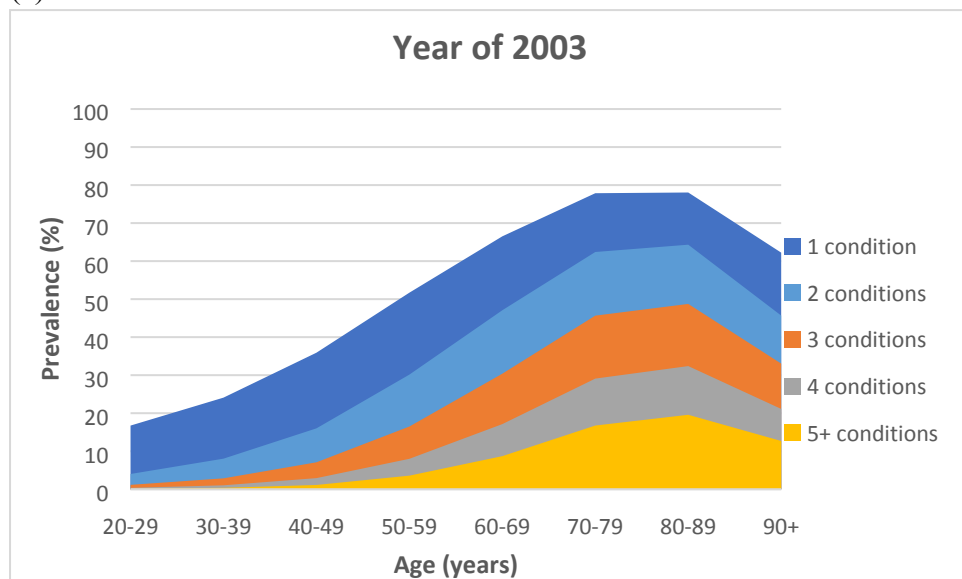

(b) Year of 2013

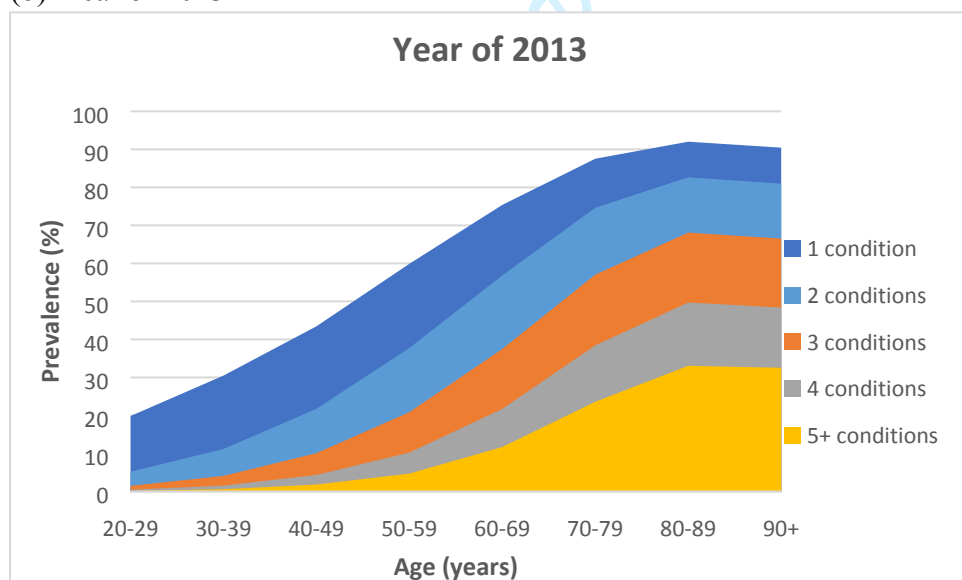

# BMJ Open

## The Increasing Age- and Gender- Specific Burden and Complexity of Multimorbidity in Taiwan, 2003-2013

|                                 |                                                                                                                                                                                                                                                                                                                                                                                                                                                                                              |
|---------------------------------|----------------------------------------------------------------------------------------------------------------------------------------------------------------------------------------------------------------------------------------------------------------------------------------------------------------------------------------------------------------------------------------------------------------------------------------------------------------------------------------------|
| Journal:                        | <i>BMJ Open</i>                                                                                                                                                                                                                                                                                                                                                                                                                                                                              |
| Manuscript ID                   | bmjopen-2018-028333.R1                                                                                                                                                                                                                                                                                                                                                                                                                                                                       |
| Article Type:                   | Research                                                                                                                                                                                                                                                                                                                                                                                                                                                                                     |
| Date Submitted by the Author:   | 15-Mar-2019                                                                                                                                                                                                                                                                                                                                                                                                                                                                                  |
| Complete List of Authors:       | Hu, Rey-Hsing ; National Taiwan Ocean University, Department of Computer Science and Engineering<br>Hsiao, Fei-Yuan; National Taiwan University, Graduate Institute of Clinical Pharmacy, College of Medicine<br>Chen, Li-Ju; National Taiwan University, Health Data Research Center<br>Huang, Pei-Ting; National Taiwan Ocean University, Department of Computer Science and Engineering<br>Hsu, William; National Taiwan Ocean University, Department of Computer Science and Engineering |
| <b>Primary Subject Heading</b>: | Epidemiology                                                                                                                                                                                                                                                                                                                                                                                                                                                                                 |
| Secondary Subject Heading:      | Public health                                                                                                                                                                                                                                                                                                                                                                                                                                                                                |
| Keywords:                       | disease burden, multimorbidity, National Health Insurance Research Database                                                                                                                                                                                                                                                                                                                                                                                                                  |
|                                 |                                                                                                                                                                                                                                                                                                                                                                                                                                                                                              |

SCHOLARONE™  
Manuscripts

**Revised Manuscript (clean)****The Increasing Age- and Gender- Specific Burden and Complexity of Multimorbidity in Taiwan, 2003-2013**

Rey-Hsing Hu, M.S.<sup>1</sup>, Fei-Yuan Hsiao, Ph.D.<sup>2,3,4</sup>, Li-Ju Chen, M.S.<sup>5</sup>,

Pei-Ting Huang, M.S.<sup>1</sup>, William W.Y. Hsu, Ph.D.<sup>1\*</sup>

<sup>1</sup>Department of Computer Science and Engineering, National Taiwan Ocean University, Keelung, Taiwan;

<sup>2</sup>Graduate Institute of Clinical Pharmacy, College of Medicine, National Taiwan University, Taipei, Taiwan;

<sup>3</sup> School of Pharmacy, College of Medicine, National Taiwan University, Taipei, Taiwan;

<sup>4</sup>Department of Pharmacy, National Taiwan University Hospital, Taipei, Taiwan.

<sup>5</sup>Health Data Research Center, National Taiwan University, Taipei, Taiwan

\* Correspondence:

William W.Y. Hsu, Assistant professor

Department of Computer Science and Engineering, National Taiwan Ocean University, Keelung, Taiwan

E-mail: [wwyhsu@ntou.edu.tw](mailto:wwyhsu@ntou.edu.tw)



1  
2  
3  
4 **Running heads:** Burden and Complexity of Multimorbidity in Taiwan, 2003-2013  
5  
6  
7  
8  
9

10 **Funding:**  
11  
12

13 Dr. Hsu WY received research assistantships from a research project (MOST107-  
14  
15  
16 2221-E-019-037-MY3) sponsored by the Ministry of Science and Technology  
17  
18  
19 Taiwan. Dr. Hsiao FY received research assistantships from a research project  
20  
21  
22 (MOST 104-2410-H-002-225-MY3) sponsored by the Ministry of Science and  
23  
24  
25 Technology Taiwan.  
26  
27

28 **Disclosure of Conflicts of Interests:**  
29  
30

31 None.  
32  
33

34 **Author Contributions:**  
35  
36

37 Hu RH, Hsiao FY, Chen LJ, and Hsu WY contributed to the study concept and  
38  
39  
40 design. Hsiao FY, Hu RH, and Huang PT acquired and analyzed the data. Hsiao FY  
41  
42  
43 and Chen LJ interpreted the data. Hu RH, Hsiao FY, Chen LJ, Huang PT, and Hsu  
44  
45  
46 WY drafted the manuscript. Hsiao FY and Hsu WY revised the manuscript. All  
47  
48  
49 authors read and approved the final manuscript.  
50  
51  
52  
53  
54

55 **Keywords:** disease burden, multimorbidity, National Health Insurance Research  
56  
57  
58 Database  
59  
60

## ABSTRACT

### Objectives

Although there are accumulating evidence in multimorbidity in Western countries, that in Asian countries is very limited. This study aimed to estimate the population-based, age- and gender-specific prevalence and trends of multimorbidity in the Taiwanese population.

### Design

Cross-sectional study based on claims data (National Health Insurance Research Database, Taiwan).

### Participants

A subset of the NHIRD, which contains claim data for 2 million of randomly selected beneficiaries (~10% of total population) under Taiwan's mandatory National Health Insurance system.

### Outcome measurements

The prevalence of multimorbidity in different age groups and both sexes in the years 2003 and 2013 was reported. We further revealed data on the prevalence of 20 common diseases in each age group and sex. As for clustering effect, we used graphic displays on the likelihood of co-occurrence with 1, 2, 3, and 4 or more other diseases for each selected disease in the years 2003 and 2013.

## Results

The prevalence of multimorbidity (2+ diseases) was 20.07 % in 2003 and 30.44 % in 2013. In 2013, the prevalence varied between 5.21 % in patients aged 20-29 years and 80.96% in those aged 80-89 years. In patients aged between 50 and 79 years, the prevalence of multimorbidity was higher in women than that in men. In men, the prevalence of chronic pulmonary disease and cardiovascular-related diseases was predominant while in women, the prevalence of osteoporosis, arthritis, cancer, and psychosomatic disorders were predominant. The co-occurring diseases within each disease varied across different age and gender groups.

## Conclusions

The burden of multimorbidity was increasing and becoming more complex in Taiwan. It also varied across different age and gender groups. Fulfilling the needs of individuals with multimorbidity requires collaborative work across health care providers and needs to take into account age and gender disparities in multimorbidity.

## Strengths and limitations of this study

- This is the first nationwide study conducted in Taiwan to assess the age- and gender-specific burden and complexity of multimorbidity between 2003 and 2013.
- Multimorbidity was defined using existing methods to classify and consider geographic or ethnic discrepancies between Western and Asian countries.
- We identified multimorbidity based on the diagnoses recorded in the outpatient or inpatient visit. However, only up to three and up to five diagnoses were allowed to be recorded in each outpatient or inpatient visit in the NHIRD, the prevalence of multimorbidity may be underestimated

## Introduction

Multimorbidity, defined as the coexistence of two or more chronic health conditions in the same person at the same time, has become a significant challenge to the healthcare systems worldwide. Previous studies have reported that multimorbidity was associated with worse clinical outcomes, poorer quality of life and increased medical expenditures at individual level.<sup>1 2</sup> At the nationwide level, multimorbidity also incurs significant social and economic burden due to complex health and welfare demands as well as associated costs to care for individuals with multimorbidity<sup>1 2</sup>. These demands are expected to increase as the society aged as the prevalence of multimorbidity also increased with age<sup>3</sup>. However, effective strategies to manage multimorbidity remain unanswered. These may be due to the single-disease paradigm in the current clinical setting, which may result in fragmented care for patients manifesting multimorbidity.

To manage multimorbidity, it is necessary to measure the burden of multimorbidity. However, the phenomenon of multimorbidity is not well understood. A simple count of diseases in each identified either through self-reporting<sup>4</sup> or by extracting information from electronic medical record using lists of diagnostic codes<sup>5-8</sup> is the first and common approach. The extrapolation of the abovementioned studies,

1  
2  
3  
4 however, is difficult due to several limitations. First, most of the estimates came from  
5  
6  
7 selected medical institutions <sup>3 9-12</sup> or limited to the specific population such as the  
8  
9  
10 elderly <sup>3</sup>. Some studies using a survey to collect the potential prevalence of  
11  
12  
13 multimorbidity in patients who visit their general practitioners <sup>13 14</sup>. Population-based  
14  
15  
16 estimates are usually very limited. Second, the lists of diagnosis are likely to differ  
17  
18  
19 substantially between studies <sup>6 15 16</sup>. To the best of our knowledge, there is currently  
20  
21  
22 no single set of codes that have been consistently used to identify patients with  
23  
24  
25 multimorbidity. Third, the prevalence of multimorbidity in Asian countries is very  
26  
27  
28 limited while the prevalence of multimorbidity may vary ethnically or geographically.  
29  
30  
31 Based on two systematic reviews conducted by Pati S et al <sup>17</sup> and Hu X et al <sup>18</sup> and  
32  
33  
34 other studies <sup>19-21</sup>, available evidence of multimorbidity in Asian countries were  
35  
36  
37 limited to specific area in one country <sup>19-21</sup> (i.e. no population-based data were  
38  
39  
40 available), limited by sample size (mostly including only hundreds of people) <sup>19-21</sup> and  
41  
42  
43 limited to the method that measure multimorbidity (mostly were self-reported).  
44  
45  
46 Similarly, they mainly focused on the prevalence of multimorbidity in the elderly <sup>17 18</sup>  
47  
48  
49 <sup>20</sup>. In addition, most of existing studies were cross-sectional one-time measurement of  
50  
51  
52 the prevalence of multimorbidity <sup>17 18 20</sup> and were not presented the time changes of  
53  
54  
55 burden of multimorbidity.  
56  
57  
58  
59  
60

1  
2  
3  
4 To fill the current knowledge gap, this study aimed to estimate the population-based,  
5  
6  
7 age- and gender-specific prevalence and trends of multimorbidity using Taiwan's  
8  
9  
10 National Health Insurance Research Database (NHIRD).  
11  
12  
13  
14  
15  
16  
17  
18  
19  
20  
21  
22  
23  
24  
25  
26  
27  
28  
29  
30  
31  
32  
33  
34  
35  
36  
37  
38  
39  
40  
41  
42  
43  
44  
45  
46  
47  
48  
49  
50  
51  
52  
53  
54  
55  
56  
57  
58  
59  
60

For peer review only

## Methods

### Data source

A population-based cross-sectional study was conducted using administrative claims data from Taiwan's National Health Insurance Research Database (NHIRD). The NHIRD is a nationwide claims-based database comprising anonymous eligibility and enrollment information, as well as claims for outpatient visits, admissions, procedures and prescription medications of more than 99 % of the entire population (23 million) in Taiwan <sup>22</sup>.

We used a subset of the NHIRD, which contains claim data for 2 million of randomly selected beneficiaries to create an 11-year (2003-2013) panel of claims for analysis. In this study, we used two subsets of the NHIRD, the Longitudinal Health Insurance Database (LHID) 2005 and 2010 as our data source. These two datasets were made up of claims data on one million beneficiaries that were randomly sampled by the National Health Research Institute (NHRI), Taiwan. The one million beneficiaries in LHID 2005 were randomly selected from the year 2005 Registry for Beneficiaries of the NHIRD, which includes registration data of approximately 25.68 million beneficiaries of the National Health Insurance (NHI) program during the year 2005. The one million beneficiaries in LHID 2010 were randomly selected from the year 2010



1  
2  
3  
4 Registry for Beneficiaries of the NHIRD, which includes registration data of  
5  
6  
7 approximately 27.38 million beneficiaries of the NHI program during the year 2010.  
8  
9

10 According to the statistics provided by the NHRI, there were no significant differences  
11  
12 in the gender distribution between patients in the LHID 2005 and the original NHIRD  
13  
14 ( $\chi^2=0.008$ ,  $df=1$ ,  $p$ -value=0.931), and between those in the LHID 2010 and the original  
15  
16 NHIRD ( $\chi^2=0.067$ ,  $df=1$ ,  $p$ -value=0.796)<sup>23</sup>. Therefore, the two subsets were thought to  
17  
18  
19 be representative enough of the original NHIRD, and the results obtained suggested  
20  
21  
22 generalizability to the whole Taiwanese population.  
23  
24  
25  
26  
27  
28  
29

30  
31 A total of two million individuals, which composed approximately 10% of the total  
32  
33 population in Taiwan, constituted the study population of this study. The identification  
34  
35 numbers and all traceable personal identifiers of the insured in NHIRD were encrypted  
36  
37  
38 to ensure the confidentiality and privacy. In this way, this study was exempt from full  
39  
40  
41 review by the Institutional Review Board of the National Taiwan University Hospital,  
42  
43  
44 Taipei, Taiwan, and the requirement for providing informed consent was not imposed.  
45  
46  
47  
48  
49  
50  
51

## 52 **Ethical statement**

53

54  
55 The identification numbers for all of the entries in the NHIRD were encrypted to  
56  
57  
58 protect the privacy of the individual patients. The study protocol was approved by the  
59  
60

1  
2  
3  
4 Institution Review Board of the National Taiwan University Hospital (National  
5  
6  
7 Taiwan University Hospital Research Ethics Committee No. 201403069W).  
8  
9  
10  
11  
12

### 13 **Patient and public involvement**

14  
15  
16 Patients were not involved in the design or conduct of this study.  
17  
18  
19  
20  
21

### 22 **Identification of common diseases**

23  
24  
25 We defined cases as patients who had at least three diagnoses with 20 common diseases  
26  
27  
28 upon outpatient or inpatient visits during the study period. To ensure the specificity of  
29  
30  
31 every disease, only those who had at least 3 outpatient or 1 inpatient claims record of  
32  
33  
34 that specified diagnosis code in one year were considered as having that specified  
35  
36  
37 disease. This algorithm was adopted from many published studies using NHIRD to  
38  
39  
40 identify comorbidities<sup>24-26</sup>. For example, one individual must at least have three  
41  
42  
43 different visits for hypertension (e.g. March 1, May 2, and July 15, 2003) were  
44  
45  
46 considered as having hypertension in that year. Same algorithm was applied to other  
47  
48  
49 disease. Therefore, if this person also has at least three different visits for diabetes  
50  
51  
52 mellitus then he or she was defined as having two diseases (multimorbidity) in that  
53  
54  
55 year. Based on our algorithm, the diseases we selected in this study were chronic  
56  
57  
58 diseases.  
59  
60

1  
2  
3  
4  
5  
6  
7 Similar with most previous studies focusing on multimorbidity, we also specify  
8  
9  
10 multimorbidity in this study on condition that patients concurrently suffered from two  
11  
12  
13 or more of these 20 common diseases. The 20 common diseases included hypertension,  
14  
15  
16 diabetes, congestive heart failure, coronary syndrome, cardiac dysrhythmias, peripheral  
17  
18  
19 vascular disease, cerebrovascular disease, chronic pulmonary disease, renal disease,  
20  
21  
22 liver disease, dementia, other neurological disorders, digestive disorder, osteoporosis,  
23  
24  
25 arthritis (including rheumatoid arthritis), anxiety dissociative and somatoform disorders,  
26  
27  
28 bipolar disorder, depression, schizophrenia and psychotic disorders, and cancer. The  
29  
30  
31 detailed set of diagnostic codes regarding the definition of these common diseases was  
32  
33  
34 demonstrated in **Supplementary Table S1**. These diseases were selected based on the  
35  
36  
37 disease burden that they may fall on the whole society regarding considerable cost, the  
38  
39  
40 requirement for long-term care, reduced health-related quality of life, hospitalization,  
41  
42  
43 or death illustrated in previous studies<sup>6 25 27</sup>. Three epidemiologists with clinical and  
44  
45  
46 research expertise in chronic diseases and multimorbidity took part in the discussions  
47  
48  
49 based on literature review of existing definitions of chronic disease across scientific  
50  
51  
52 papers. Since there was a lack of consensus over what diseases should be included in  
53  
54  
55 the definition of multimorbidity,, we sought the union of the diseases included in two  
56  
57  
58 of the previous studies investigating multimorbidity<sup>6 27</sup> and those in a Taiwanese study  
59  
60

1  
2  
3  
4 (our previous study with a geriatric specialist involved) evaluating the association  
5  
6  
7 between multimorbidity and unplanned hospitalization, admission to intensive care  
8  
9  
10 units, and mortality<sup>25</sup>. In this way, we believed that the list of diseases which we  
11  
12  
13 adopted to define multimorbidity was capable of reflecting the disease burden the  
14  
15  
16 population carried and was applicable in the Taiwanese population.  
17  
18  
19  
20  
21

## 22 **Statistical Analysis**

23  
24  
25 We reported descriptive data on the prevalence of multimorbidity in different age  
26  
27  
28 groups (categorized into eight groups including 20-29, 30-39, 40-49, 50-59, 60-69, 70-  
29  
30  
31 79, 80-89, and 90+) and both sexes (men and women) in the years 2003 and 2013  
32  
33  
34 (annual point prevalence). Chi-square tests were used to compare prevalence in the  
35  
36  
37 years 2003 and 2013. The prevalence of multimorbidity was calculated by dividing the  
38  
39  
40 number of patients afflicted with multimorbidity by population size in each age group  
41  
42  
43 regarding the degree of multimorbidity (grouped into 2, 3, 4, and 5+). We further  
44  
45  
46 revealed data on the prevalence of each of the 20 common diseases in each age group  
47  
48  
49 and sex. The individual prevalence was the estimated fraction (percentage, %) with the  
50  
51  
52 number of patients with each disease in each age and sex group as the numerator and  
53  
54  
55 with population size in each group and sex as the denominator.  
56  
57

58 As for clustering effect, we used graphic displays on the likelihood of co-  
59  
60

1  
2  
3  
4 occurrence with 1, 2, 3, and 4 or more other diseases for each selected disease in the  
5  
6  
7 years 2003 and 2013. The likelihood was the estimated proportion with the number of  
8  
9  
10 patients suffering from the same disease with concurrent 1, 2, 3, and 4 or more other  
11  
12  
13 diseases divided by the number of patients with a specific disease. We also adopted  
14  
15  
16 graphics to demonstrate differences in the prevalence of multimorbidity and clustering  
17  
18  
19 effect between both sexes and among age groups in 2003 and 2013, respectively. All  
20  
21  
22 data in this study were analyzed using Python programming language with Mongo  
23  
24  
25 database software, version 3.6.4 and 4.0.2.  
26  
27  
28  
29  
30

## 31 **Results**

32  
33  
34 In general, the prevalence of at least one of 20 common diseases was 37.23 % in  
35  
36  
37 2003, and an approximately ten percent increase was observed in the year of 2013  
38  
39  
40 (48.97 % in 2013, **Table 1**). The prevalence of at least one disease ranged from 16.74  
41  
42  
43 % in patients aged 20-29 years to 78.05 % in those aged 80-89 years in 2003. In 2013,  
44  
45  
46 the prevalence varied between 19.85 % in patients aged 20-29 years and 92.01% in  
47  
48  
49 those aged 80-89 years. Increases in the prevalence of at least one disease were  
50  
51  
52 observed in all age groups, and the magnitude was from 3.11 % in patients aged 20-29  
53  
54  
55 years to a dramatic 28.21 % in those aged 90 years or above in the years 2003 and 2013  
56  
57  
58 (**Table 1**, Supplementary **Figure S1**). As for the multimorbidity, the increasing  
59  
60

1  
2  
3  
4 prevalence across all age groups and different intensity of multimorbidity was of great  
5  
6  
7 concern. For instance, the prevalence of three of 20 common diseases was 30.39 % in  
8  
9  
10 patients aged 60-69 years in 2003, and an approximately seven percent increase in  
11  
12  
13 prevalence was observed in 2013. In patients aged 90 years or above, the increase was  
14  
15  
16 even more significant. Compared to the prevalence of three diseases in 2003 (33.04 %, **Table 1**,  
17  
18 **Table 1**, Supplementary **Figure S1**), that in 2013 nearly doubled (66.52 %, **Table 1**,  
19  
20  
21 Supplementary **Figure S1**)  
22  
23  
24

25 A dramatically growing increase in the prevalence of multimorbidity was noticed  
26  
27  
28 in all age groups, especially in those aged 90 years or above, in men and women in the  
29  
30  
31 years 2003 and 2013 (**Figure 1**). Patterns of sex differences in the prevalence of  
32  
33  
34 multimorbidity were similar between the years 2003 and 2013. To be more specific, the  
35  
36  
37 prevalence of multimorbidity were comparable between men and women in patients  
38  
39  
40 aged 49 years or younger. In patients aged between 50 and 79 years, however, the  
41  
42  
43 prevalence of multimorbidity was higher in women than that in men. In patients aged  
44  
45  
46 80-89 years, the sex difference in the prevalence of multimorbidity was subtle. In  
47  
48  
49 patients aged 90 years, the sex difference in prevalence of multimorbidity was much  
50  
51  
52 higher in men than that in women (**Figure 1**).  
53  
54

55 The prevalence of each of 20 common diseases was presented in **Table 2**. The  
56  
57  
58 prevalence of all of the 20 common diseases remained comparable or increased in all  
59  
60

1  
2  
3  
4 age groups between the years 2003 and 2013. Significantly growing prevalence can be  
5  
6  
7 observed in cancer, dementia, cerebrovascular disease, and several cardiovascular-  
8  
9  
10 related diseases, including hypertension, diabetes, congestive heart failure, cardiac  
11  
12  
13 dysrhythmias, and peripheral vascular disease. The most frequently seen diseases in  
14  
15  
16 Taiwanese population consisted of hypertension, other neurological disorders, digestive  
17  
18  
19 disorder, and arthritis (including rheumatoid arthritis). Over half of patients aged elder  
20  
21  
22 than 70 years in 2013 were afflicted with hypertension, and nearly one-third of those  
23  
24  
25 suffering from other neurological disorder, digestive disorder, and arthritis (including  
26  
27  
28 rheumatoid arthritis). Although the prevalence of cancer and dementia was generally  
29  
30  
31 low in Taiwan, the disease burden caused by these two diseases cannot be overseen.  
32  
33  
34 There was nearly one-fifth of patients aged 90 years or above were affected by dementia  
35  
36  
37 and nearly one-sixth of patients aged 80 years or above lived with cancers in 2013.  
38  
39  
40 Also, there was a strikingly increasing trend in prevalence of older patients in these two  
41  
42  
43 diseases.  
44  
45

46 As shown in **Table 3**, the prevalence of each common diseases increased in  
47  
48  
49 general between the years 2003 and 2013 in both men and women. In men, the  
50  
51  
52 prevalence of chronic pulmonary disease and cardiovascular-related diseases, including  
53  
54  
55 hypertension, congestive heart failure, peripheral vascular disease were predominant.  
56  
57  
58 In women, the prevalence of osteoporosis, arthritis (including rheumatoid arthritis),  
59  
60

1  
2  
3  
4 cancer, and psychosomatic disorders, including depression, anxiety, bipolar disorder,  
5  
6  
7 were predominant. As for dementia, interestingly, the prevalence in men was a bit  
8  
9  
10 higher in 2003, yet the condition was quite the other way in 2013.  
11  
12

13 In **Figure 2**, we depicted sex differences in the prevalence of multimorbidity  
14  
15  
16 within individuals suffering from each common disease in 2003 and 2013. Generally,  
17  
18  
19 compared to the year of 2003, multimorbidity was more frequently seen in 2013 in both  
20  
21  
22 sexes within all common diseases. Except for bipolar disorder and schizophrenia and  
23  
24  
25 psychotic disorders, which were least likely to occur with other diseases, other diseases  
26  
27  
28 might coexist with other diseases to some extents. In 2003, patients with anxiety,  
29  
30  
31 dissociative and somatoform disorders, digestive disorder, and hypertension were most  
32  
33  
34 likely to suffer from other diseases concurrently, but the sex difference was minor. In  
35  
36  
37 2013, patients with the diseases mentioned above were most likely to have other  
38  
39  
40 diseases in the same time as well, the sex difference, on the contrary, was more  
41  
42  
43 noticeable. Specifically, a higher proportion of women suffering from anxiety,  
44  
45  
46 dissociative and somatoform disorders, and digestive disorder are of greater odds to  
47  
48  
49 have other concurrent diseases. Profound sex difference in multimorbidity can also be  
50  
51  
52 observed in patients with other diseases, including arthritis (including rheumatoid  
53  
54  
55 arthritis), osteoporosis, other neurological disorders, and liver disease, where women  
56  
57  
58 with the first three were of higher prevalence to concurrently have other diseases.  
59  
60



## Discussions

To the best of our knowledge, this population-based study is the largest and the most comprehensive epidemiologic study to provide age- and gender-specific information on multimorbidity in the Taiwanese population. Previous studies are all limited to Western Countries, such as Canada<sup>6</sup> or Australia<sup>13</sup>. Nevertheless, the etiology of multimorbidity may have geographical discrepancies. Our study also fills the knowledge gap of existing studies conducted in Asian countries<sup>17 18</sup> by providing the nationwide estimates of multimorbidity across different age groups and by providing the 10-years changes of burden of multimorbidity, which have not been done in existing studies. This information is therefore extremely fundamental for constructing national policies to combat the burden of multimorbidity, particularly in Asian countries. Our study also provides in-depth analyses of each selected disease and their concomitant comorbidities. This study could thus serve as valuable references for strategic thinking regarding sophisticated diseases management plans.

We found that the prevalence of multimorbidity was increasing in the 10-years follow-up period. This increase is reasonable considering the threat of aging population<sup>28</sup> and is consistent with a previous study conducted in Ontario residents<sup>6</sup>.

1  
2  
3  
4 The prevalence of multimorbidity among Ontarians rose from 17.4% in 2003 to  
5  
6  
7 24.3% in 2009, a 40% increase. In our study, the prevalence of multimorbidity rose  
8  
9  
10 from 20.07% in 2013 to 30.44 % in 2009, a 51.6% increase. Although the different  
11  
12  
13 magnitude of the increase could result from the various lists of diseases selected to  
14  
15  
16 count multimorbidity; the Ontario study includes 16 common chronic conditions<sup>6</sup>  
17  
18  
19 while our study includes 20 common chronic conditions. However, the speed of aging  
20  
21  
22 in the two different populations may explain the discrepancies better. The population  
23  
24  
25 is aging rapidly in Taiwan. Up until the end of 2010, 11% of Taiwan's population was  
26  
27  
28 aged more than 65 years. The ratio has been reached to 14% (the threshold for an  
29  
30  
31 “aged” society) by 2017, and the estimated ratio will expect to increase to 20% (the  
32  
33  
34 threshold for a “superaged” society) by 2025 in Taiwan <sup>29</sup>.

35  
36  
37  
38  
39  
40 Multimorbidity, particularly in the elderly, is therefore very important for almost  
41  
42  
43 every country. In our study, we found that the prevalence of multimorbidity (2+  
44  
45  
46 diseases) in people aged 60-69, 70-79 and 80-89 were 56.84%, 74.64%, 82.64%,  
47  
48  
49 respectively, in 2013. The prevalence of multimorbidity (3+ diseases) in people aged  
50  
51  
52 60-69, 70-79 and 80-89 were 37.49%, 57.04%, 68.10%, respectively, in 2013. Facing  
53  
54  
55 such tremendous and complex medical demands, it is necessary to reform the current  
56  
57  
58 “single disease or specialty” paradigm into the “integrated and comprehensive  
59  
60

1  
2  
3  
4 medical care” model<sup>30</sup>. In our study, we also found that the combination and intensity  
5  
6  
7 of multimorbidity differed in older men and women. This finding may further indicate  
8  
9  
10 different medical needs for older men and women and gender-specific care plan for  
11  
12  
13 older people may be warranted. Our estimates are thus could serve as good references  
14  
15  
16 for countries facing such a rapid speed of aging to allocate medical and social welfare  
17  
18  
19 resources, including Taiwan or our neighbor country, Japan<sup>31</sup> or other European  
20  
21  
22 countries<sup>32</sup>.

23  
24  
25  
26  
27  
28 In addition to older people, the prevalence of multimorbidity among the younger  
29  
30  
31 population yield special attention. As most researches in multimorbidity have focused  
32  
33  
34 on older adults<sup>33 34</sup>, evidence regarding this issue in young adults is very limited. In  
35  
36  
37 our study, the prevalence of multimorbidity (2+ diseases) in people aged 30-39, 40-49  
38  
39  
40 and 50-89 were 11.18%, 21.76%, and 37.75%, respectively, in 2013. This indicates  
41  
42  
43 the need for early intervention in those who already suffer from multimorbidity in  
44  
45  
46 their middle-ages as the intensity of multimorbidity gradually increase as shown in  
47  
48  
49 our study. Lifestyle factors such as smoking, drinking, exercise or diet in middle ages  
50  
51  
52 were reported to be associated with multimorbidity<sup>35</sup>.

53  
54  
55  
56  
57  
58 Most importantly, our study contributes to the understanding of the in-depth details of  
59  
60

1  
2  
3  
4 multimorbidity. In addition to revealing very distinct predominant diseases in men  
5  
6  
7 and women, we also reported the burden of multimorbidity in each common chronic  
8  
9  
10 condition. From a clinical perspective, our findings can help further strata the patients  
11  
12  
13 within a specific disease group. For example, care for patients with diabetes mellitus  
14  
15  
16 and with one other comorbid conditions should be very different from patients with  
17  
18  
19 diabetes mellitus and with four other comorbid conditions. From a policy perspective,  
20  
21  
22 our findings can help allocate medical resources more efficiently. Our previous  
23  
24  
25 studies also support this strata strategy (or identifying high-risk group) we found that  
26  
27  
28 the increase of diabetic complications was positively associated with increased risk of  
29  
30  
31 hospitalization and healthcare costs<sup>36 37</sup>.

32  
33  
34  
35  
36  
37 While we provide great epidemiologic information of age- and gender-specific, it  
38  
39  
40 has some limitations due to the nature of claims data. First, we identified the disease  
41  
42  
43 based on the diagnoses recorded in the outpatient or inpatient visit. However, only up  
44  
45  
46 to three and up to five diagnoses were allowed to be recorded in each outpatient or  
47  
48  
49 inpatient visit, the prevalence of multimorbidity may be underestimated. Second, as  
50  
51  
52 we used the NHIRD, the estimation about the multimorbidity in this study was from  
53  
54  
55 the perspective of the national insurance system. Patients who pay out-of-pocket for  
56  
57  
58 their diseases are not recorded in the NHIRD as well. Thirdly, as there is no  
59  
60

1  
2  
3  
4 consensus of the number of diseases used to identify multimorbidity, comparisons of  
5  
6  
7 epidemiology of multimorbidity in different countries were very difficult. For  
8  
9  
10 example, a systematic review conducted by Pati S et al <sup>17</sup> revealed that among 13  
11  
12  
13 studies included in their systematic review, the number of health conditions analyzed  
14  
15  
16 per study varied from 7 to 22 with prevalence of multimorbidity varied from 4.5% to  
17  
18  
19 83%.

20  
21  
22  
23  
24  
25 Conclusively, our study is the first population-based study conducted in Taiwan  
26  
27  
28 providing age- and gender-specific information on multimorbidity. The burden of  
29  
30  
31 multimorbidity was increasing and becoming more complex in Taiwan. Providing for  
32  
33  
34 the needs of individuals with multimorbidity requires collaborative work across health  
35  
36  
37 care providers and may need to take into account age and gender disparities in  
38  
39  
40 multimorbidity.

## 41 42 43 44 **Acknowledgements**

45  
46  
47 We thank the National Health Insurance Administration (NHIA) and National  
48  
49  
50 Health Research Institutes (NHRI) for making the databases used in this study  
51  
52  
53 available. However, the content of this article does not represent any official position  
54  
55  
56 of the NHIA or NHRI. The authors have full access to all of the data in the study and  
57  
58  
59 take responsibility for the integrity of the data and the accuracy of the data analysis.  
60

## Data sharing statement

Data for this study were provided by the National Health Insurance Administration, Taiwan following ethical approval, and may be available to other researchers who meet data access requirements.

## Figure legends

**Figure 1. Prevalence of multi-morbidity in Taiwan by the number of common diseases \*, sex, age group, and year. (a) Men and women in 2003. (b) Men and women in 2013.**

**Figure 2. Prevalence of multi-morbidity in Taiwan within common diseases, by sex and year.**

## References

1. Huntley A, Johnson R, Purdy S, et al. Measures of multimorbidity and morbidity burden for use in primary care and community settings: a systematic review and guide. *Ann Fam Med* 2012;**10**(2):134-41.
2. Marengoni A, Angleman S, Melis R, et al. Aging with multimorbidity: a systematic review of the literature. *Ageing Res Rev* 2011;**10**(4):430-39.
3. Schram M, Frijters D, van de Lisdonk E, et al. Setting and registry characteristics affect the prevalence and nature of multimorbidity in the elderly. *J Clin Epidemiol* 2008;**61**(11):1104-12.
4. Taylor A, Price K, Gill T, et al. Multimorbidity - not just an older person's issue. Results from an Australian biomedical study. *BMC Public Health* 2010(**10**):718.
5. Barnett K, Mercer S, Norbury M, et al. Epidemiology of multimorbidity and implications for health care, research, and medical education: a cross-sectional study. *Lancet* 2012;**380**(9836):37-43.
6. Pefoyo A, Bronskill S, Gruneir A, et al. The increasing burden and complexity of multimorbidity. *BMC Public Health* 2015(**15**):415.
7. van Oostrom S, Picavet H, de Bruin S, et al. Multimorbidity of chronic diseases and health care utilization in general practice. *BMC Fam Pract* 2014(**15**):61.
8. van Oostrom S, Picavet H, van Gelder B, et al. Multimorbidity and comorbidity in the Dutch population - data from general practices. *BMC Public Health* 2012(**12**):715.
9. Araujo M, Silva M, Galvao T, et al. Prevalence and patterns of multimorbidity in Amazon Region of Brazil and associated determinants: a cross-sectional study. *BMJ Open* 2018;**8**(11):e023398.
10. Brett T, Arnold-Reed D, Popescu A, et al. Multimorbidity in patients attending 2 Australian primary care practices. *Ann Fam Med* 2013;**11**(6):535-42.
11. Britt H, Harrison C, Miller G, et al. Prevalence and patterns of multimorbidity in Australia. *Med J Aust* 2008;**189**(2):72-77.
12. Excoffier S, Herzig L, N'Goran A, et al. Prevalence of multimorbidity in general practice: a cross-sectional study within the Swiss Sentinel Surveillance System (Sentinella). *BMJ Open* 2018;**8**(3):e019616.
13. Harrison C, Henderson J, Miller G, et al. The prevalence of complex multimorbidity in Australia. *Aust N Z J Public Health* 2016;**40**(3):239-44.
14. Harrison C, Henderson J, Miller G, et al. The prevalence of diagnosed chronic conditions and multimorbidity in Australia: A method for estimating population prevalence from general practice patient encounter data. *PLoS One* 2017;**12**(3):e0172935.

15. Cassell A, Edwards D, Harshfield A, et al. The epidemiology of multimorbidity in primary care: a retrospective cohort study. *Br J Gen Pract* 2018;**68**(669):e245-e51.
16. Stanley J, Semper K, Millar E, et al. Epidemiology of multimorbidity in New Zealand: a cross-sectional study using national-level hospital and pharmaceutical data. *BMJ Open* 2018;**8**(5):e021689.
17. Pati S, Swain S, Hussain MA, et al. Prevalence and outcomes of multimorbidity in South Asia: a systematic review. *BMJ Open* 2015;**5**(10):e007235.
18. Hu X, Huang J, Lv Y, et al. Status of prevalence study on multimorbidity of chronic disease in China: systematic review. *Geriatr Gerontol Int* 2015;**15**(1):1-10.
19. Ge L, Yap CW, Heng BH. Sex differences in associations between multimorbidity and physical function domains among community-dwelling adults in Singapore. *PLoS One* 2018;**13**(5):e0197443.
20. Mini GK, Thankappan KR. Pattern, correlates and implications of non-communicable disease multimorbidity among older adults in selected Indian states: a cross-sectional study. *BMJ Open* 2017;**7**(3):e013529.
21. Pati S, Hussain MA, Swain S, et al. Development and Validation of a Questionnaire to Assess Multimorbidity in Primary Care: An Indian Experience. *Biomed Res Int* 2016;**2016**:6582487.
22. Hsiao FY, Yang CL, Huang YT, et al. Using Taiwan's national health insurance research databases for pharmacoepidemiology research. *J Food Drug Anal* 2007;**15**(2):99-108.
23. National Health Research Institute, Taiwan. National Health Insurance Research Database, Taiwan. Available from: [https://nhird.nhri.org.tw/en/Data\\_Subsets.html](https://nhird.nhri.org.tw/en/Data_Subsets.html). Accessed August 22 2018.
24. Chen CY, Wu VC, Lin CJ, et al. Improvement in Mortality and End-Stage Renal Disease in Patients With Type 2 Diabetes After Acute Kidney Injury Who Are Prescribed Dipeptidyl Peptidase-4 Inhibitors. *Mayo Clin Proc* 2018;**93**(12):1760-74.
25. Wen YC, Chen LK, Hsiao FY. Predicting mortality and hospitalization of older adults by the multimorbidity frailty index. *PLoS One* 2017;**12**(11):e0187825.
26. Dai YX, Wang SC, Chou YJ, et al. Smoking, but not alcohol, is associated with risk of psoriasis in a Taiwanese population-based cohort study. *J Am Acad Dermatol* 2019;**80**(3):727-34.
27. Lenzi J, Avaldi V, Rucci P, et al. Burden of multimorbidity in relation to age, gender and immigrant status: a cross-sectional study based on administrative data. *BMJ Open* 2016;**6**(12):e012812.



- 1
- 2
- 3
- 4 28. Lu WH, Lee WJ, Chen LK, et al. Comparisons of annual health care utilization,
- 5 drug consumption, and medical expenditure between the elderly and general
- 6 population in Taiwan. *J Clin Gerontol Geriatr* 2016;**7**(2):44-47.
- 7
- 8 29. National Development Council. Population Projections for R.O.C.
- 9 (Taiwan):2014-2060. Available from:
- 10 [https://www.ndc.gov.tw/Content\\_List.aspx?n=84223C65B6F94D72](https://www.ndc.gov.tw/Content_List.aspx?n=84223C65B6F94D72). Accessed
- 11 November 21 2018.
- 12
- 13
- 14 30. Arai H, Ouchi Y, Toba K, et al. Japan as the front-runner of super-aged societies:
- 15 Perspectives from medicine and medical care in Japan. *Geriatr Gerontol Int*
- 16 2015;**15**(6):673-87.
- 17
- 18 31. Arai H, Ouchi Y, Yokode M, et al. Toward the realization of a better aged
- 19 society: messages from gerontology and geriatrics. *Geriatr Gerontol Int*
- 20 2012;**12**(1):16-22.
- 21
- 22
- 23 32. Perales J, Martin S, Ayuso-Mateos J, et al. Factors associated with active aging
- 24 in Finland, Poland, and Spain. *Int Psychogeriatr* 2014;**26**(8):1363-75.
- 25
- 26 33. Uijen A, van de Lisdonk E. Multimorbidity in primary care: prevalence and trend
- 27 over the last 20 years. *Eur J Gen Pract* 2008;**14**(Suppl 1):28-32.
- 28
- 29 34. van den Akker M, Buntinx F, Metsmakers J, et al. Multimorbidity in general
- 30 practice: prevalence, incidence, and determinants of co-occurring chronic and
- 31 recurrent diseases. *J Clin Epidemiol* 1998;**51**(5):367-75.
- 32
- 33 35. Fortin M, Haggerty J, Almirall J, et al. Lifestyle factors and multimorbidity: a
- 34 cross sectional study. *BMC Public Health* 2014;**14**:686.
- 35
- 36 36. Chen HL, Hsiao FY. Risk of hospitalization and healthcare cost associated with
- 37 Diabetes Complication Severity Index in Taiwan's National Health Insurance
- 38 Research Database. *J Diabetes Complications* 2014;**28**(5):612-16.
- 39
- 40 41 37. Chen HL, Hsu WW, Hsiao FY. Changes in prevalence of diabetic complications
- 42 and associated healthcare costs during a 10-year follow-up period among a
- 43 nationwide diabetic cohort. *J Diabetes Complications* 2015;**29**(4):523-28.
- 44
- 45
- 46
- 47
- 48
- 49
- 50
- 51
- 52
- 53
- 54
- 55
- 56
- 57
- 58
- 59
- 60

**Table 1. Prevalence of multi-morbidity in Taiwan by number of common diseases \*, age group, and year**

| <b>2003</b>       |                             |                                               |                                                                      |          |          |           |  |
|-------------------|-----------------------------|-----------------------------------------------|----------------------------------------------------------------------|----------|----------|-----------|--|
| <b>Age groups</b> | <b>Taiwanese Population</b> | <b>Prevalence of at least one disease (%)</b> | <b>Prevalence of multimorbidity, by degree of multimorbidity (%)</b> |          |          |           |  |
|                   |                             |                                               | <b>2</b>                                                             | <b>3</b> | <b>4</b> | <b>5+</b> |  |
| 20-29             | 285,406                     | 16.74                                         | 4.01                                                                 | 1.15     | 0.36     | 0.12      |  |
| 30-39             | 273,713                     | 24.09                                         | 8.04                                                                 | 2.86     | 1.03     | 0.37      |  |
| 40-49             | 269,568                     | 35.91                                         | 16.01                                                                | 7.08     | 2.92     | 1.12      |  |
| 50-59             | 175,456                     | 51.70                                         | 30.15                                                                | 16.49    | 8.00     | 3.57      |  |
| 60-69             | 114,876                     | 66.52                                         | 47.08                                                                | 30.39    | 17.13    | 8.70      |  |
| 70-79             | 74,756                      | 77.86                                         | 62.40                                                                | 45.66    | 29.10    | 16.75     |  |
| 80-89             | 20,002                      | 78.05                                         | 64.32                                                                | 48.74    | 32.39    | 19.58     |  |
| 90+               | 1,946                       | 62.23                                         | 45.68                                                                | 33.04    | 21.12    | 12.69     |  |
| All               | 1,215,723                   | 37.23                                         | 20.07                                                                | 11.40    | 6.09     | 3.07      |  |
| <b>2013</b>       |                             |                                               |                                                                      |          |          |           |  |
| <b>Age groups</b> | <b>Taiwanese Population</b> | <b>Prevalence of at least one disease (%)</b> | <b>Prevalence of multimorbidity, by degree of multimorbidity (%)</b> |          |          |           |  |
|                   |                             |                                               | <b>2</b>                                                             | <b>3</b> | <b>4</b> | <b>5+</b> |  |
| 20-29             | 245,613                     | 19.85 †                                       | 5.21                                                                 | 1.49     | 0.47     | 0.15      |  |
| 30-39             | 295,797                     | 30.49 †                                       | 11.18                                                                | 4.10     | 1.55     | 0.60      |  |
| 40-49             | 277,889                     | 43.45 †                                       | 21.76                                                                | 10.08    | 4.35     | 1.83      |  |
| 50-59             | 272,719                     | 59.90 †                                       | 37.75                                                                | 20.87    | 10.24    | 4.71      |  |
| 60-69             | 173,213                     | 75.39 †                                       | 56.84                                                                | 37.49    | 21.74    | 11.70     |  |
| 70-79             | 102,826                     | 87.53 †                                       | 74.64                                                                | 57.04    | 38.44    | 23.60     |  |
| 80-89             | 52,978                      | 92.01 †                                       | 82.64                                                                | 68.10    | 49.71    | 33.06     |  |
| 90+               | 8,492                       | 90.44 †                                       | 80.96                                                                | 66.52    | 48.39    | 32.54     |  |
| All               | 1,429,527                   | 48.97 †                                       | 30.44                                                                | 18.61    | 10.73    | 5.94      |  |

\*Hypertension, diabetes, congestive heart failure, coronary syndrome, cardiac dysrhythmias, peripheral vascular disease, cerebrovascular disease, chronic pulmonary disease, renal disease, liver disease, dementia, other neurological disorders, digestive disorder, osteoporosis, arthritis (including rheumatoid arthritis), anxiety dissociative and somatoform disorders, bipolar disorder, depression, schizophrenia and psychotic disorders, and cancer

†P<0.05 compared to prevalence in 2003 using chi-square tests.

**Table 2. Prevalence of 20 common diseases in Taiwan, by age group and year**

| Disease                             | Year        | Number with condition<br>(prevalence, %) | Prevalence of each disease, by age group (%) |       |       |       |       |       |       |       |
|-------------------------------------|-------------|------------------------------------------|----------------------------------------------|-------|-------|-------|-------|-------|-------|-------|
|                                     |             |                                          | 20-29                                        | 30-39 | 40-49 | 50-59 | 60-69 | 70-79 | 80-89 | 90+   |
| <b>Hypertension</b>                 | <b>2003</b> | 126,651(10.42)                           | 0.22                                         | 1.38  | 6.31  | 17.11 | 29.91 | 42.36 | 43.26 | 28.78 |
|                                     | <b>2013</b> | 260,198(18.20) †                         | 0.43                                         | 2.38  | 9.54  | 22.91 | 39.64 | 55.39 | 61.71 | 56.64 |
| <b>Diabetes</b>                     | <b>2003</b> | 56,627(4.66)                             | 0.20                                         | 0.77  | 3.00  | 8.51  | 14.04 | 16.31 | 12.51 | 5.86  |
|                                     | <b>2013</b> | 126,991(8.88) †                          | 0.35                                         | 1.27  | 4.50  | 11.47 | 21.10 | 26.39 | 25.23 | 18.38 |
| <b>Congestive heart failure</b>     | <b>2003</b> | 44,622(3.67)                             | 0.06                                         | 0.38  | 1.80  | 5.35  | 10.43 | 17.25 | 19.95 | 15.88 |
|                                     | <b>2013</b> | 71,026(4.97) †                           | 0.09                                         | 0.45  | 1.87  | 4.99  | 10.10 | 17.19 | 24.78 | 28.24 |
| <b>Coronary syndrome</b>            | <b>2003</b> | 35,539(2.92)                             | 0.04                                         | 0.25  | 1.19  | 3.98  | 8.75  | 14.82 | 16.05 | 11.20 |
|                                     | <b>2013</b> | 60,367(4.22) †                           | 0.05                                         | 0.27  | 1.43  | 4.19  | 9.38  | 15.29 | 19.72 | 18.86 |
| <b>Cardiac dysrhythmias</b>         | <b>2003</b> | 14,337(1.18)                             | 0.14                                         | 0.31  | 0.69  | 1.47  | 2.89  | 5.24  | 6.67  | 5.29  |
|                                     | <b>2013</b> | 29,098(2.04) †                           | 0.18                                         | 0.32  | 0.83  | 1.79  | 3.76  | 6.95  | 10.88 | 12.69 |
| <b>Peripheral vascular disease</b>  | <b>2003</b> | 14,873(1.22)                             | 0.07                                         | 0.13  | 0.44  | 1.23  | 3.34  | 7.10  | 8.70  | 4.78  |
|                                     | <b>2013</b> | 28,562(2.00) †                           | 0.08                                         | 0.17  | 0.48  | 1.45  | 3.92  | 8.66  | 11.34 | 9.89  |
| <b>Cerebrovascular disease</b>      | <b>2003</b> | 28,098(2.31)                             | 0.14                                         | 0.25  | 0.86  | 2.74  | 6.59  | 12.09 | 15.26 | 11.51 |
|                                     | <b>2013</b> | 56,770(3.97) †                           | 0.18                                         | 0.38  | 1.12  | 3.24  | 7.82  | 15.35 | 22.51 | 23.85 |
| <b>Chronic pulmonary disease</b>    | <b>2003</b> | 37,897(3.12)                             | 0.78                                         | 1.32  | 1.95  | 3.46  | 7.25  | 12.22 | 15.14 | 12.85 |
|                                     | <b>2013</b> | 50,705(3.55) †                           | 0.74                                         | 1.26  | 1.80  | 3.02  | 5.77  | 10.73 | 17.17 | 21.15 |
| <b>Renal disease</b>                | <b>2003</b> | 13,999(1.15)                             | 0.18                                         | 0.34  | 0.77  | 1.57  | 2.80  | 4.54  | 5.07  | 3.44  |
|                                     | <b>2013</b> | 38,748(2.71) †                           | 0.18                                         | 0.44  | 1.06  | 2.44  | 5.19  | 9.64  | 13.79 | 14.13 |
| <b>Liver disease</b>                | <b>2003</b> | 43,555(3.58)                             | 1.39                                         | 2.58  | 4.03  | 5.53  | 6.23  | 5.44  | 3.41  | 1.64  |
|                                     | <b>2013</b> | 71,015(4.97) †                           | 0.79                                         | 2.88  | 5.13  | 7.28  | 8.56  | 8.05  | 5.69  | 4.03  |
| <b>Dementia</b>                     | <b>2003</b> | 5,194(0.43)                              | 0.10                                         | 0.12  | 0.17  | 0.27  | 0.72  | 2.24  | 5.06  | 6.27  |
|                                     | <b>2013</b> | 18,869(1.32) †                           | 0.13                                         | 0.19  | 0.30  | 0.51  | 1.27  | 4.89  | 12.77 | 20.54 |
| <b>Other neurological disorders</b> | <b>2003</b> | 124,029(10.20)                           | 4.25                                         | 6.84  | 9.44  | 13.12 | 18.24 | 24.21 | 26.53 | 17.78 |
|                                     | <b>2013</b> | 217,307(15.20) †                         | 6.54                                         | 10.37 | 13.29 | 16.90 | 21.42 | 29.04 | 33.85 | 31.03 |

**Table 2. Prevalence of 20 common diseases or in Taiwan, by age group and year (cont'd)**

| Disease                                        | Year | Number with condition<br>(prevalence, %) | Prevalence of each disease, by age group (%) |       |       |       |       |       |       |       |
|------------------------------------------------|------|------------------------------------------|----------------------------------------------|-------|-------|-------|-------|-------|-------|-------|
|                                                |      |                                          | 20-29                                        | 30-39 | 40-49 | 50-59 | 60-69 | 70-79 | 80-89 | 90+   |
| Digestive disorder                             | 2003 | 152,161(12.52)                           | 6.81                                         | 8.54  | 11.19 | 14.94 | 21.03 | 29.22 | 32.39 | 25.95 |
|                                                | 2013 | 227,327(15.90) †                         | 8.41                                         | 11.15 | 13.40 | 17.09 | 22.01 | 29.06 | 35.24 | 37.48 |
| Osteoporosis                                   | 2003 | 14,732(1.21)                             | 0.09                                         | 0.13  | 0.49  | 2.04  | 3.59  | 5.02  | 6.08  | 5.45  |
|                                                | 2013 | 17,026(1.19)                             | 0.07                                         | 0.11  | 0.23  | 0.74  | 2.10  | 5.23  | 7.67  | 9.15  |
| Arthritis (including rheumatoid arthritis)     | 2003 | 149,434(12.29)                           | 3.87                                         | 6.34  | 11.05 | 18.01 | 25.54 | 31.95 | 30.18 | 19.63 |
|                                                | 2013 | 226,844(15.87) †                         | 4.18                                         | 7.28  | 12.01 | 19.46 | 27.70 | 37.45 | 37.03 | 29.30 |
| Anxiety, dissociative and somatoform disorders | 2003 | 52,029(4.28)                             | 1.27                                         | 2.48  | 4.17  | 6.34  | 8.48  | 9.99  | 9.49  | 5.91  |
|                                                | 2013 | 89,053(6.23) †                           | 1.69                                         | 3.45  | 5.82  | 8.00  | 10.29 | 11.91 | 11.18 | 8.44  |
| Bipolar disorder                               | 2003 | 8,251(0.68)                              | 0.44                                         | 0.59  | 0.72  | 0.84  | 0.89  | 1.03  | 0.89  | 0.51  |
|                                                | 2013 | 15,439(1.08) †                           | 0.51                                         | 0.80  | 1.25  | 1.30  | 1.44  | 1.50  | 1.32  | 0.92  |
| Depression                                     | 2003 | 11,630(0.96)                             | 0.64                                         | 0.82  | 0.97  | 1.14  | 1.27  | 1.51  | 1.61  | 1.13  |
|                                                | 2013 | 24,712(1.73) †                           | 0.86                                         | 1.30  | 1.89  | 2.00  | 2.24  | 2.52  | 2.59  | 2.25  |
| Schizophrenia and psychotic disorders          | 2003 | 7,472(0.61)                              | 0.48                                         | 0.80  | 0.74  | 0.57  | 0.43  | 0.40  | 0.55  | 0.51  |
|                                                | 2013 | 11,624(0.81) †                           | 0.42                                         | 0.82  | 1.10  | 1.00  | 0.77  | 0.65  | 0.55  | 0.67  |
| Cancer                                         | 2003 | 37,438(3.08)                             | 1.26                                         | 2.22  | 3.77  | 4.11  | 4.47  | 5.50  | 5.46  | 2.93  |
|                                                | 2013 | 83,065(5.81) †                           | 1.36                                         | 2.97  | 5.68  | 7.22  | 9.19  | 11.54 | 12.57 | 12.16 |

†P<0.05 compared to prevalence in 2003 using chi-square tests.

**Table 3. Prevalence of 20 common diseases in Taiwan, by sex, age group and year**

| Disease                     | Year | Prevalence     |        | Prevalence of each disease, by age group (%) |      |       |      |       |      |       |       |       |       |       |       |       |       |       |       |
|-----------------------------|------|----------------|--------|----------------------------------------------|------|-------|------|-------|------|-------|-------|-------|-------|-------|-------|-------|-------|-------|-------|
|                             |      | Prevalence (%) |        | 20-29                                        |      | 30-39 |      | 40-49 |      | 50-59 |       | 60-69 |       | 70-79 |       | 80-89 |       | 90+   |       |
|                             |      | Male           | Female | M                                            | F    | M     | F    | M     | F    | M     | F     | M     | F     | M     | F     | M     | F     | M     | F     |
| Hypertension                | 2003 | 10.52          | 10.33  | 0.33                                         | 0.11 | 1.90  | 0.92 | 7.29  | 5.42 | 17.13 | 17.09 | 27.66 | 31.83 | 39.89 | 44.96 | 41.16 | 45.18 | 29.55 | 28.31 |
|                             | 2013 | 19.40          | 17.13  | 0.68                                         | 0.21 | 3.58  | 1.35 | 12.67 | 6.71 | 25.93 | 20.10 | 40.55 | 38.81 | 51.88 | 58.30 | 58.03 | 65.22 | 54.02 | 58.70 |
| Diabetes                    | 2003 | 4.77           | 4.56   | 0.21                                         | 0.19 | 1.05  | 0.51 | 3.73  | 2.34 | 9.15  | 7.94  | 13.07 | 14.86 | 14.10 | 18.64 | 11.47 | 13.47 | 5.75  | 5.93  |
|                             | 2013 | 9.57           | 8.26   | 0.40                                         | 0.31 | 1.75  | 0.86 | 6.18  | 2.97 | 13.52 | 9.56  | 21.87 | 20.40 | 24.50 | 27.96 | 22.52 | 27.81 | 17.60 | 18.99 |
| Congestive heart failure    | 2003 | 3.71           | 3.63   | 0.09                                         | 0.03 | 0.54  | 0.24 | 2.12  | 1.51 | 5.48  | 5.25  | 9.58  | 11.16 | 16.27 | 18.28 | 19.34 | 20.51 | 17.10 | 15.14 |
|                             | 2013 | 5.24           | 4.72   | 0.14                                         | 0.04 | 0.68  | 0.25 | 2.56  | 1.25 | 5.82  | 4.21  | 10.67 | 9.58  | 16.02 | 18.15 | 23.37 | 26.13 | 27.04 | 29.18 |
| Coronary syndrome           | 2003 | 3.21           | 2.67   | 0.05                                         | 0.03 | 0.33  | 0.17 | 1.51  | 0.89 | 4.47  | 3.55  | 8.81  | 8.70  | 15.53 | 14.07 | 16.88 | 15.30 | 11.76 | 10.86 |
|                             | 2013 | 5.00           | 3.52   | 0.06                                         | 0.04 | 0.44  | 0.13 | 2.14  | 0.78 | 5.49  | 2.99  | 11.24 | 7.71  | 16.41 | 14.36 | 20.94 | 18.55 | 20.42 | 17.65 |
| Cardiac dysrhythmias        | 2003 | 1.19           | 1.17   | 0.13                                         | 0.15 | 0.29  | 0.33 | 0.64  | 0.73 | 1.39  | 1.54  | 2.90  | 2.88  | 5.40  | 5.06  | 6.85  | 6.51  | 6.57  | 4.53  |
|                             | 2013 | 2.10           | 1.98   | 0.16                                         | 0.20 | 0.31  | 0.34 | 0.85  | 0.81 | 1.83  | 1.77  | 3.94  | 3.60  | 7.08  | 6.84  | 11.69 | 10.11 | 12.81 | 12.61 |
| Peripheral vascular disease | 2003 | 1.23           | 1.22   | 0.08                                         | 0.06 | 0.16  | 0.11 | 0.47  | 0.41 | 1.20  | 1.25  | 3.01  | 3.62  | 7.01  | 7.19  | 8.97  | 8.46  | 5.61  | 4.28  |
|                             | 2013 | 2.00           | 2.00   | 0.06                                         | 0.10 | 0.18  | 0.16 | 0.54  | 0.44 | 1.60  | 1.32  | 3.83  | 4.00  | 8.06  | 9.16  | 11.76 | 10.95 | 11.25 | 8.82  |
| Cerebrovascular disease     | 2003 | 2.61           | 2.04   | 0.16                                         | 0.12 | 0.34  | 0.18 | 1.07  | 0.67 | 3.18  | 2.36  | 7.05  | 6.19  | 13.01 | 11.11 | 16.29 | 14.31 | 14.09 | 9.96  |
|                             | 2013 | 4.54           | 3.46   | 0.19                                         | 0.17 | 0.47  | 0.29 | 1.47  | 0.80 | 4.05  | 2.50  | 9.15  | 6.61  | 16.65 | 14.28 | 24.45 | 20.67 | 24.81 | 23.09 |

**Table 3. Prevalence of 20 common diseases in Taiwan, by sex, age group and year (cont'd)**

| Disease                      | Year | Prevalence     |        | Prevalence of each disease, by age group (%) |      |       |       |       |       |       |       |       |       |       |       |       |       |       |       |
|------------------------------|------|----------------|--------|----------------------------------------------|------|-------|-------|-------|-------|-------|-------|-------|-------|-------|-------|-------|-------|-------|-------|
|                              |      | Prevalence (%) |        | 20-29                                        |      | 30-39 |       | 40-49 |       | 50-59 |       | 60-69 |       | 70-79 |       | 80-89 |       | 90+   |       |
|                              |      | Male           | Female | M                                            | F    | M     | F     | M     | F     | M     | F     | M     | F     | M     | F     | M     | F     | M     | F     |
| Chronic pulmonary disease    | 2003 | 3.51           | 2.76   | 0.80                                         | 0.76 | 1.24  | 1.39  | 1.99  | 1.93  | 3.50  | 3.41  | 8.02  | 6.59  | 15.19 | 9.08  | 19.80 | 10.86 | 17.51 | 10.04 |
|                              | 2013 | 4.00           | 3.14   | 0.71                                         | 0.76 | 1.16  | 1.34  | 1.75  | 1.85  | 3.09  | 2.96  | 6.52  | 5.10  | 13.26 | 8.62  | 21.96 | 12.60 | 26.98 | 16.58 |
| Renal disease                | 2003 | 1.29           | 1.03   | 0.22                                         | 0.15 | 0.42  | 0.27  | 0.86  | 0.68  | 1.68  | 1.48  | 3.02  | 2.62  | 4.90  | 4.16  | 6.09  | 4.14  | 4.51  | 2.80  |
|                              | 2013 | 3.26           | 2.22   | 0.21                                         | 0.15 | 0.58  | 0.32  | 1.42  | 0.72  | 3.04  | 1.89  | 6.25  | 4.23  | 11.26 | 8.29  | 15.84 | 11.85 | 16.96 | 11.91 |
| Liver disease                | 2003 | 4.61           | 2.66   | 2.12                                         | 0.76 | 3.95  | 1.36  | 5.64  | 2.56  | 6.38  | 4.78  | 6.70  | 5.83  | 5.59  | 5.28  | 3.90  | 2.96  | 2.19  | 1.32  |
|                              | 2013 | 6.20           | 3.86   | 1.12                                         | 0.49 | 4.30  | 1.66  | 7.35  | 3.12  | 8.92  | 5.76  | 9.21  | 7.97  | 8.49  | 7.68  | 6.13  | 5.28  | 4.66  | 3.53  |
| Dementia                     | 2003 | 0.46           | 0.39   | 0.15                                         | 0.06 | 0.18  | 0.07  | 0.21  | 0.13  | 0.32  | 0.23  | 0.75  | 0.70  | 2.14  | 2.35  | 4.82  | 5.28  | 4.24  | 7.49  |
|                              | 2013 | 1.31           | 1.33   | 0.16                                         | 0.10 | 0.26  | 0.14  | 0.41  | 0.20  | 0.63  | 0.41  | 1.31  | 1.23  | 4.52  | 5.20  | 11.70 | 13.79 | 18.81 | 21.89 |
| Other neurological disorders | 2003 | 8.00           | 12.17  | 3.29                                         | 5.08 | 5.24  | 8.27  | 6.90  | 11.76 | 9.31  | 16.48 | 14.62 | 21.32 | 21.26 | 27.32 | 23.99 | 28.86 | 17.10 | 18.19 |
|                              | 2013 | 12.02          | 18.05  | 4.74                                         | 8.19 | 7.79  | 12.59 | 10.02 | 16.25 | 12.66 | 20.81 | 16.84 | 25.58 | 25.34 | 32.12 | 32.25 | 35.37 | 30.73 | 31.26 |

**Table 3. Prevalence of 20 common diseases in Taiwan, by sex, age group and year (cont'd)**

| Disease                                        | Year | Prevalence (%) |        | Prevalence of each disease, by age group (%) |       |       |       |       |       |       |       |       |       |       |       |       |       |       |       |
|------------------------------------------------|------|----------------|--------|----------------------------------------------|-------|-------|-------|-------|-------|-------|-------|-------|-------|-------|-------|-------|-------|-------|-------|
|                                                |      |                |        | 20-29                                        |       | 30-39 |       | 40-49 |       | 50-59 |       | 60-69 |       | 70-79 |       | 80-89 |       | 90+   |       |
|                                                |      | Male           | Female | M                                            | F     | M     | F     | M     | F     | M     | F     | M     | F     | M     | F     | M     | F     | M     | F     |
| Digestive disorder                             | 2003 | 11.62          | 13.32  | 4.92                                         | 8.46  | 7.63  | 9.35  | 10.53 | 11.79 | 13.78 | 15.96 | 19.84 | 22.04 | 29.87 | 28.54 | 34.65 | 30.32 | 28.04 | 24.69 |
|                                                | 2013 | 14.01          | 17.60  | 5.65                                         | 10.93 | 8.59  | 13.34 | 11.63 | 15.00 | 15.14 | 18.91 | 20.14 | 23.69 | 28.32 | 29.67 | 37.55 | 33.04 | 41.88 | 34.03 |
| Osteoporosis                                   | 2003 | 0.45           | 1.89   | 0.13                                         | 0.05  | 0.14  | 0.13  | 0.26  | 0.70  | 0.41  | 3.48  | 0.91  | 5.87  | 2.07  | 8.14  | 2.75  | 9.14  | 4.10  | 6.26  |
|                                                | 2013 | 0.58           | 1.74   | 0.09                                         | 0.05  | 0.15  | 0.08  | 0.26  | 0.21  | 0.45  | 1.02  | 0.76  | 3.31  | 1.98  | 7.93  | 3.72  | 11.43 | 5.25  | 12.21 |
| Arthritis (including rheumatoid arthritis)     | 2003 | 12.26          | 12.32  | 4.81                                         | 3.05  | 7.46  | 5.35  | 11.49 | 10.65 | 16.09 | 19.70 | 22.43 | 28.20 | 30.16 | 33.85 | 29.71 | 30.61 | 22.85 | 17.70 |
|                                                | 2013 | 15.32          | 16.36  | 4.89                                         | 3.53  | 8.75  | 6.03  | 12.75 | 11.34 | 18.01 | 20.80 | 24.02 | 31.04 | 32.67 | 41.43 | 35.62 | 38.37 | 30.49 | 28.36 |
| Anxiety, dissociative and somatoform disorders | 2003 | 3.36           | 5.10   | 1.11                                         | 1.42  | 2.05  | 2.86  | 3.26  | 5.01  | 4.47  | 7.99  | 6.27  | 10.36 | 8.18  | 11.91 | 8.46  | 10.44 | 6.43  | 5.60  |
|                                                | 2013 | 4.90           | 7.42   | 1.50                                         | 1.86  | 2.95  | 3.87  | 4.76  | 6.78  | 5.99  | 9.87  | 7.55  | 12.78 | 9.09  | 14.26 | 9.34  | 12.94 | 7.93  | 8.84  |
| Bipolar disorder                               | 2003 | 0.55           | 0.79   | 0.43                                         | 0.45  | 0.44  | 0.72  | 0.55  | 0.87  | 0.63  | 1.02  | 0.72  | 1.03  | 0.87  | 1.20  | 0.76  | 1.02  | 0.55  | 0.49  |
|                                                | 2013 | 0.84           | 1.29   | 0.51                                         | 0.51  | 0.65  | 0.93  | 0.95  | 1.52  | 0.97  | 1.62  | 1.04  | 1.79  | 1.10  | 1.84  | 1.09  | 1.54  | 0.99  | 0.86  |
| Depression                                     | 2003 | 0.80           | 1.10   | 0.66                                         | 0.62  | 0.65  | 0.98  | 0.76  | 1.15  | 0.86  | 1.39  | 1.00  | 1.50  | 1.32  | 1.71  | 1.44  | 1.77  | 0.82  | 1.32  |
|                                                | 2013 | 1.42           | 2.00   | 0.87                                         | 0.84  | 1.11  | 1.47  | 1.56  | 2.19  | 1.56  | 2.42  | 1.70  | 2.73  | 1.96  | 2.98  | 2.23  | 2.93  | 2.20  | 2.29  |
| Schizophrenia and psychotic disorders          | 2003 | 0.68           | 0.56   | 0.62                                         | 0.37  | 0.96  | 0.65  | 0.81  | 0.68  | 0.51  | 0.62  | 0.34  | 0.51  | 0.37  | 0.43  | 0.49  | 0.61  | 0.41  | 0.58  |
|                                                | 2013 | 0.89           | 0.75   | 0.50                                         | 0.35  | 0.98  | 0.68  | 1.32  | 0.91  | 1.04  | 0.97  | 0.70  | 0.85  | 0.51  | 0.77  | 0.49  | 0.60  | 0.59  | 0.74  |
| Cancer                                         | 2003 | 2.21           | 3.85   | 0.90                                         | 1.58  | 1.22  | 3.11  | 1.80  | 5.56  | 2.80  | 5.26  | 4.26  | 4.66  | 6.22  | 4.73  | 6.82  | 4.21  | 4.38  | 2.06  |
|                                                | 2013 | 5.06           | 6.49   | 1.02                                         | 1.67  | 1.82  | 3.95  | 3.41  | 7.73  | 5.76  | 8.57  | 9.09  | 9.29  | 13.37 | 10.02 | 15.81 | 9.49  | 16.21 | 8.99  |

Figure 1. Prevalence of multi-morbidity in Taiwan by number of common diseases \*, sex, age group, and year

(a) Men and women in 2003

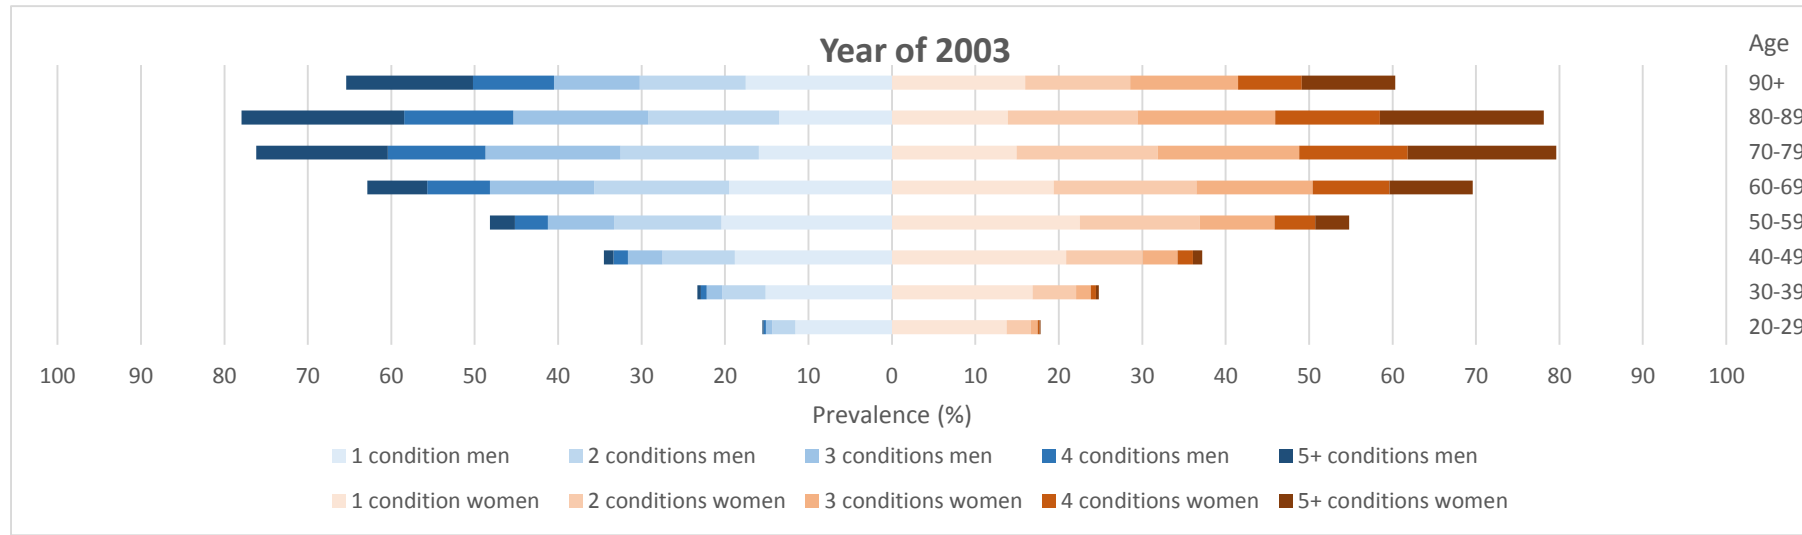

(b) Men and women in 2013

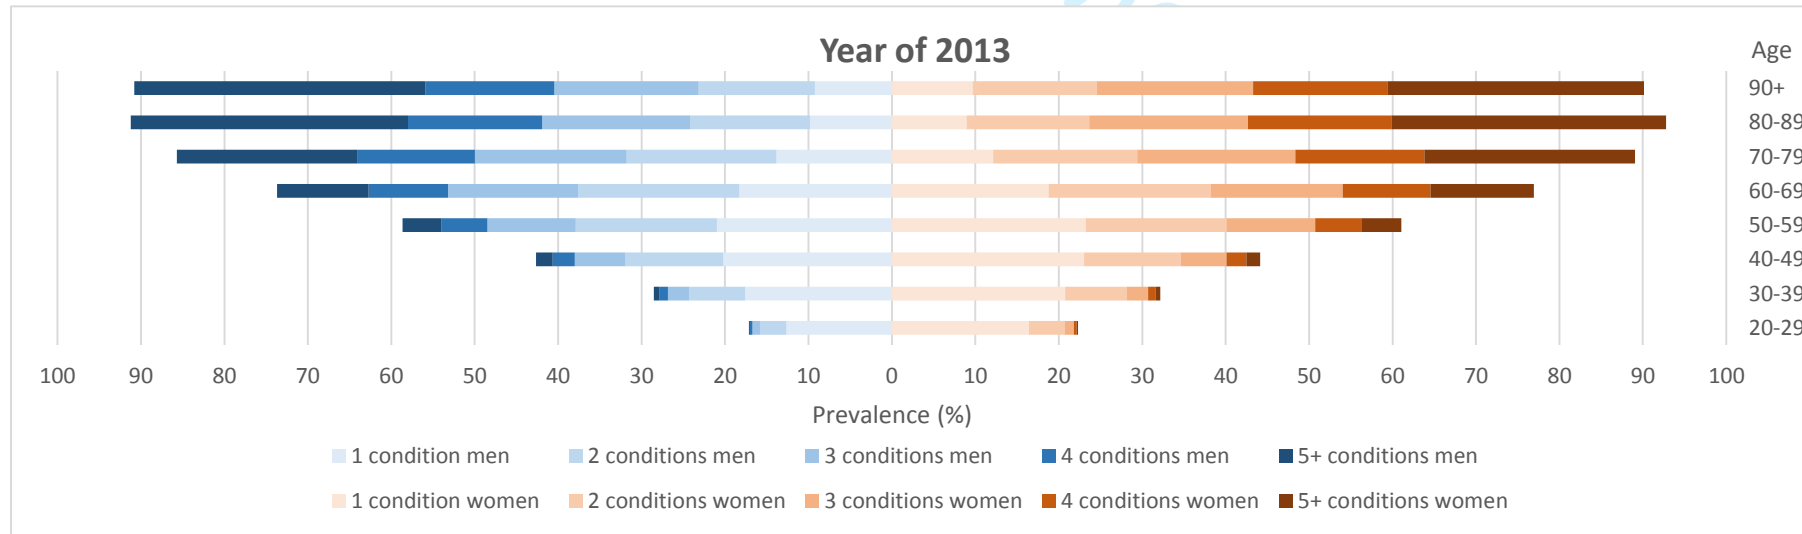

\*Hypertension, diabetes, congestive heart failure, coronary syndrome, cardiac dysrhythmias, peripheral vascular disease, cerebrovascular disease, chronic pulmonary disease, renal disease, liver disease, dementia, other neurological disorders, digestive disorder, osteoporosis, arthritis (including rheumatoid arthritis), anxiety dissociative and somatoform disorders, bipolar disorder, depression, schizophrenia and psychotic disorders, and cancer



Figure 2. Prevalence of multi-morbidity in Taiwan within common diseases, by sex and year.

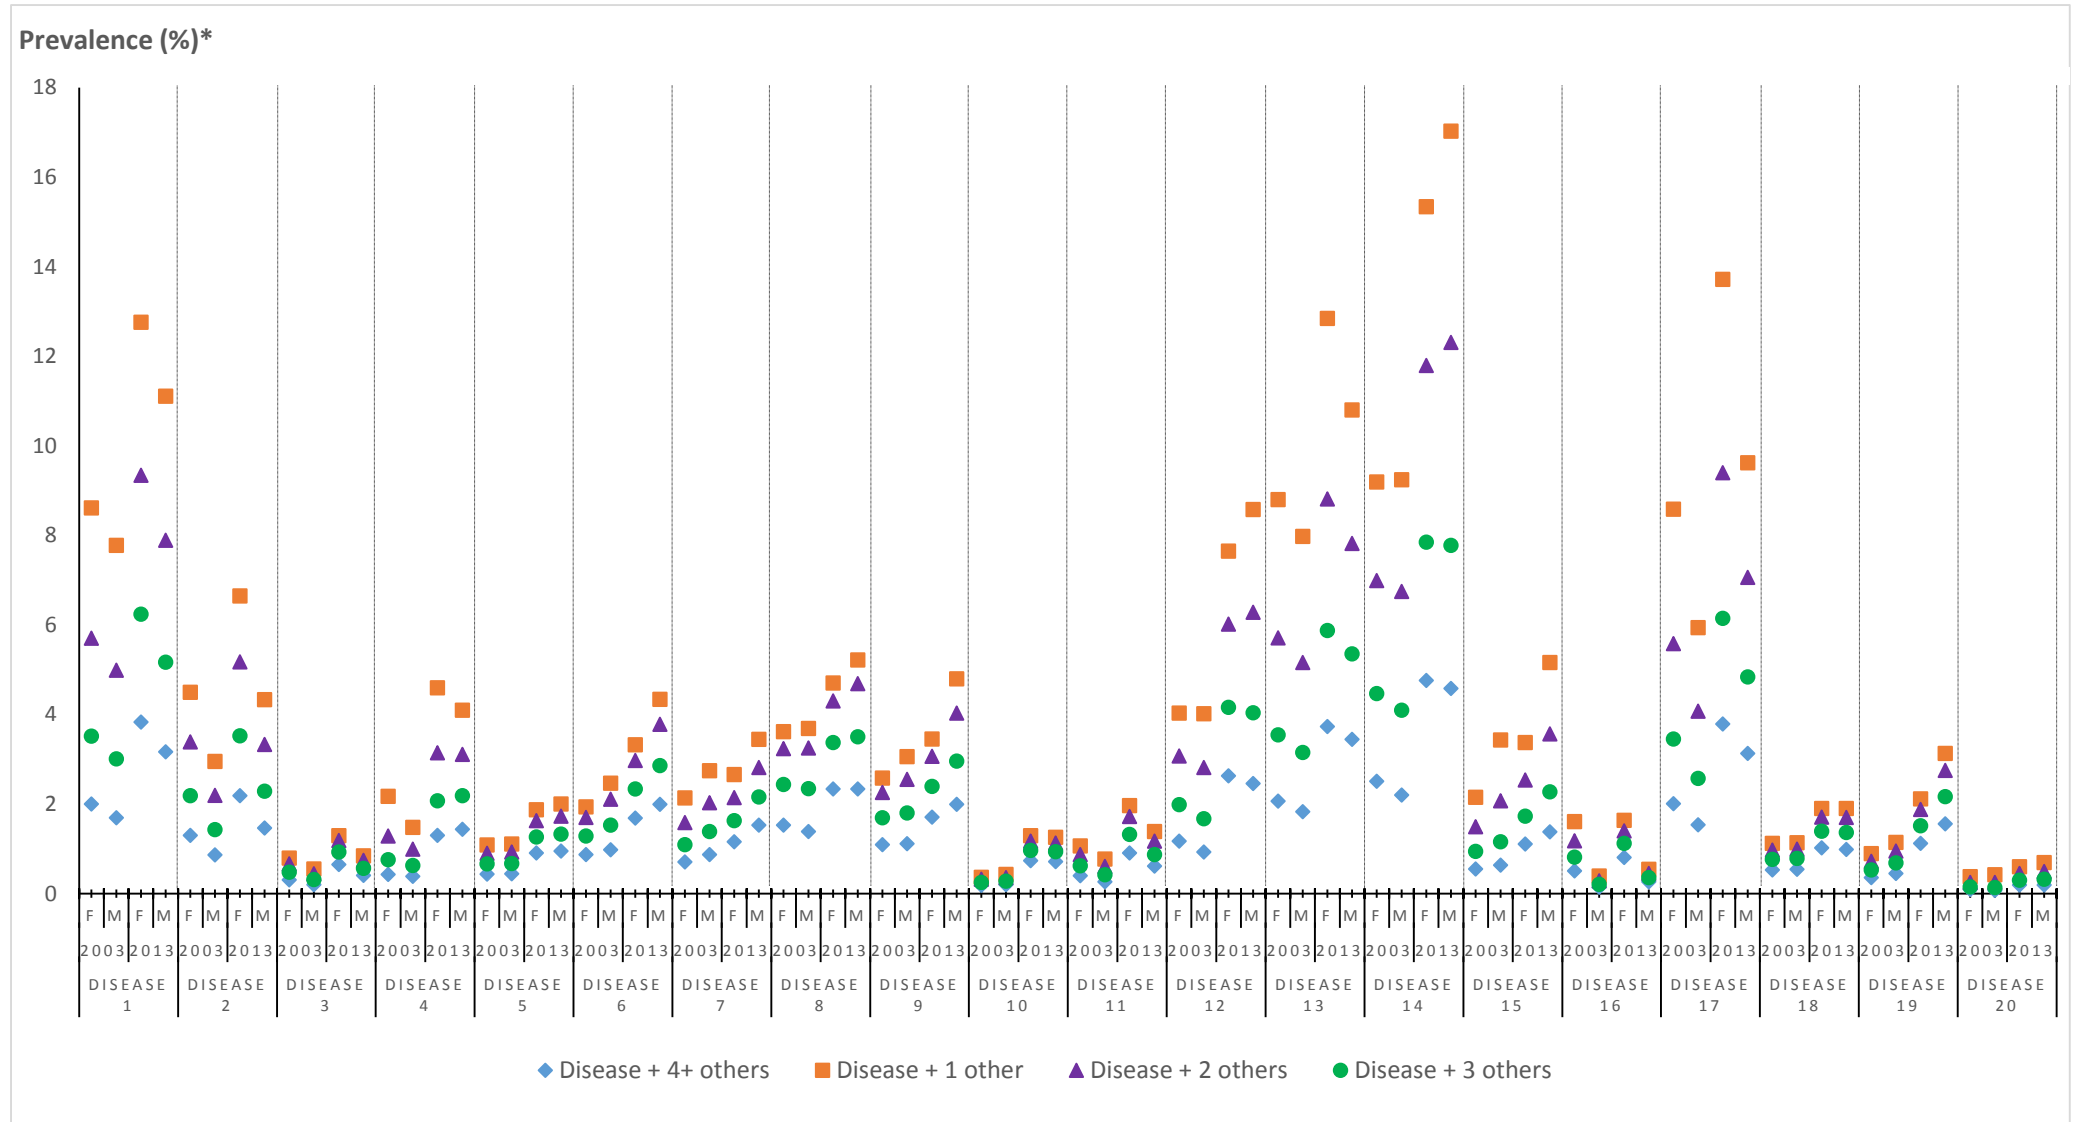

\*Prevalence (%): the number of patients suffering from a specific disease with concurrent 1, 2, 3, or 4+ other diseases divided by the number of patients with a specific disease. (Disease 1: Anxiety, dissociative and somatoform disorders; Disease 2: Arthritis (including rheumatoid arthritis); Disease 3: Bipolar disorder; Disease 4: Cancer; Disease 5: Cardiac dysrhythmias; Disease 6: Cerebrovascular disease; Disease 7: Chronic pulmonary disease; Disease 8: Congestive heart failure; Disease 9: Coronary syndrome; Disease 10: Dementia; Disease 11: Depression; Disease 12: Diabetes; Disease 13: Digestive disorders; Disease 14: Hypertension; Disease 15: Liver disease; Disease 16: Osteoporosis; Disease 17: Other neurological disorders; Disease 18: Peripheral vascular disease; Disease 19: Renal disease; Disease 20: Schizophrenia and psychotic disorders.)

Table S1. ICD-9-CM codes regarding the definition of 20 common diseases

| <b>Disease</b>                             | <b>ICD-9-CM code</b>                                                                                                                                                                                                                                                                                                                                                                    |
|--------------------------------------------|-----------------------------------------------------------------------------------------------------------------------------------------------------------------------------------------------------------------------------------------------------------------------------------------------------------------------------------------------------------------------------------------|
| Hypertension                               | 401, 402, 403, 404, 405                                                                                                                                                                                                                                                                                                                                                                 |
| Diabetes                                   | 250                                                                                                                                                                                                                                                                                                                                                                                     |
| Congestive heart failure                   | 39891, 40201, 40211, 40291, 40401, 40403, 40411, 40413, 40491, 40493, 4254, 4255, 4257, 4258, 4259, 428                                                                                                                                                                                                                                                                                 |
| Coronary syndrome                          | 410, 411, 412, 413, 414                                                                                                                                                                                                                                                                                                                                                                 |
| Cardiac dysrhythmias                       | 427                                                                                                                                                                                                                                                                                                                                                                                     |
| Peripheral vascular disease                | 0930, 4373, 4400, 4401, 44020, 44021, 44022, 44023, 44024, 44029, 44030, 44031, 44032, 4408, 4409, 44100, 44101, 44102, 44103, 4411, 4412, 4413, 4414, 4415, 4416, 4417, 4419, 4431, 44321, 44322, 44323, 44324, 44329, 44381, 44382, 44389, 4439, 4471, 5571, 5579, V434                                                                                                               |
| Cerebrovascular disease                    | 36234, 430, 431, 432, 43300, 43301, 43310, 43311, 43320, 43321, 43330, 43331, 43380, 43381, 43390, 43391, 434, 4350, 4351, 4352, 4353, 4358, 4359, 436, 437, 438                                                                                                                                                                                                                        |
| Chronic pulmonary disease                  | 4168, 4169, 490, 491, 492, 493, 4940, 4941, 4950, 4951, 4952, 4953, 4954, 4955, 4956, 4957, 4958, 4959, 496, 500, 501, 502, 503, 504, 505, 5064, 5081, 5088                                                                                                                                                                                                                             |
| Renal disease                              | 403, 404, 5820, 5821, 5822, 5824, 58281, 58289, 5829, 5830, 5831, 5832, 5834, 5836, 5837, 584, 585, 586, 5880, V420, V451, V560, V561, V562, V5631, V5632, V568                                                                                                                                                                                                                         |
| Liver disease                              | 07022, 07023, 07032, 07033, 07044, 07054, 0706, 0709, 570, 5710, 5711, 5712, 5713, 57140, 57141, 57149, 5715, 5716, 5718, 5719, 5733, 5734, 5738, 5739, V427, 4560, 4561, 45620, 45621, 5722, 5723, 5724, 5728                                                                                                                                                                          |
| Dementia                                   | 290, 2930, 2931, 29381, 29382, 29383, 29384, 29389, 2939, 2940, 2941, 2948, 2949, 3100, 3101, 3102, 3108, 3109, 3310, 3311, 3312                                                                                                                                                                                                                                                        |
| Other neurological disorders               | 3319, 332, 3334, 3335, 33392, 3340, 3341, 3342, 3343, 3344, 3348, 3349, 3350, 33510, 33511, 33519, 33520, 33521, 33522, 33523, 33524, 33529, 3358, 3359, 3362, 340, 3410, 3411, 34120, 34121, 34122, 3418, 3419, 34500, 34501, 34510, 34511, 3452, 3453, 34540, 34541, 34550, 34551, 34560, 34561, 34570, 34571, 34580, 34581, 34590, 34591, 3481, 3483, 34830, 34831, 34839, 780, 7843 |
| Digestive disorder                         | 530, 531, 532, 53300, 53301, 53310, 53311, 53320, 53321, 53330, 53331, 53340, 53341, 53350, 53351, 53360, 53361, 53370, 53371, 53390, 53391, 53400, 53401, 53410, 53411, 53420, 53421, 53430, 53431, 53440, 53441, 53450, 53451, 53460, 53461, 53470, 53471, 53490, 53491, 536, 558, 564                                                                                                |
| Osteoporosis                               | 733                                                                                                                                                                                                                                                                                                                                                                                     |
| Arthritis (including rheumatoid arthritis) | 274, 710, 711, 714, 715, 716, 718, 720, 727, 728, 729, 739                                                                                                                                                                                                                                                                                                                              |

Table S1. ICD-9-CM codes regarding the definition of 20 common diseases (continued)

| <b>Disease</b>                                 | <b>ICD-9-CM code</b>                                                                                                                                                                                                                   |
|------------------------------------------------|----------------------------------------------------------------------------------------------------------------------------------------------------------------------------------------------------------------------------------------|
| Anxiety, dissociative and somatoform disorders | 30000-30002, 30009-30016, 30019-30023, 30029, 3003, 3005-3007, 30081, 30082, 30089, 3009, 3062, 3069, 30740-30749, 3080-3084, 3089, 316                                                                                                |
| Bipolar disorder                               | 29600-29606, 29610-29616, 29640-29646, 29650-29656, 29660-29666, 2967, 29680-29682, 29689                                                                                                                                              |
| Depression                                     | 29620-29626, 29630-29636, 29690, 29699, 2980, 3090, 3091, 311                                                                                                                                                                          |
| Schizophrenia and psychotic disorders          | 29500-29505, 29510-29515, 29520-29525, 29530-29535, 29540-29545, 29550-29555, 29560-29565, 29570-29575, 29580-29585, 29590-29595, 2970-2973, 2978, 2979, 2981-2984, 2988, 2989, 29900, 29901, 29910, 29911, 29980, 29981, 29990, 29991 |
| Cancer                                         | 140-239                                                                                                                                                                                                                                |

Figure S1. Prevalence of multi-morbidity in Taiwan by number of common diseases, age group, and year

(a) Year of 2003

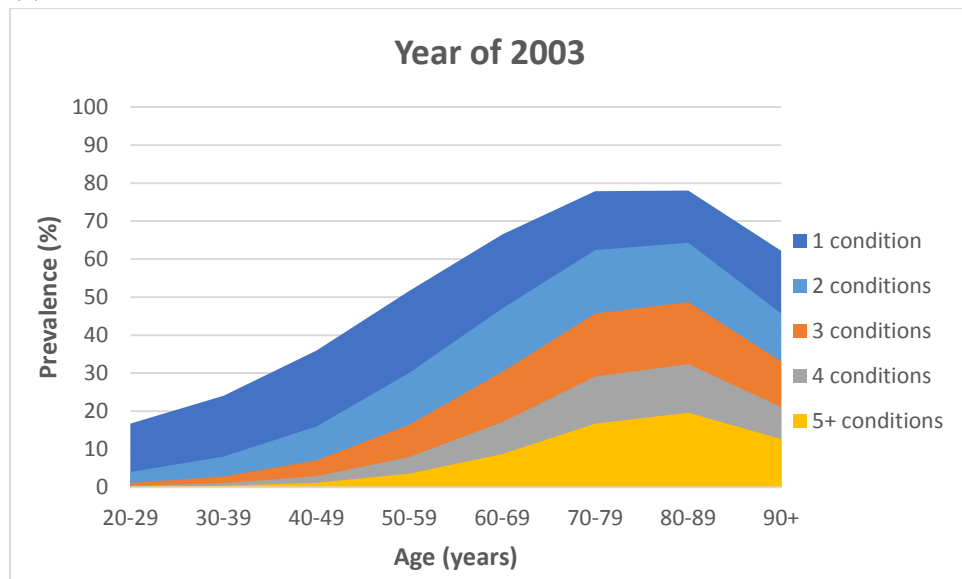

(b) Year of 2013

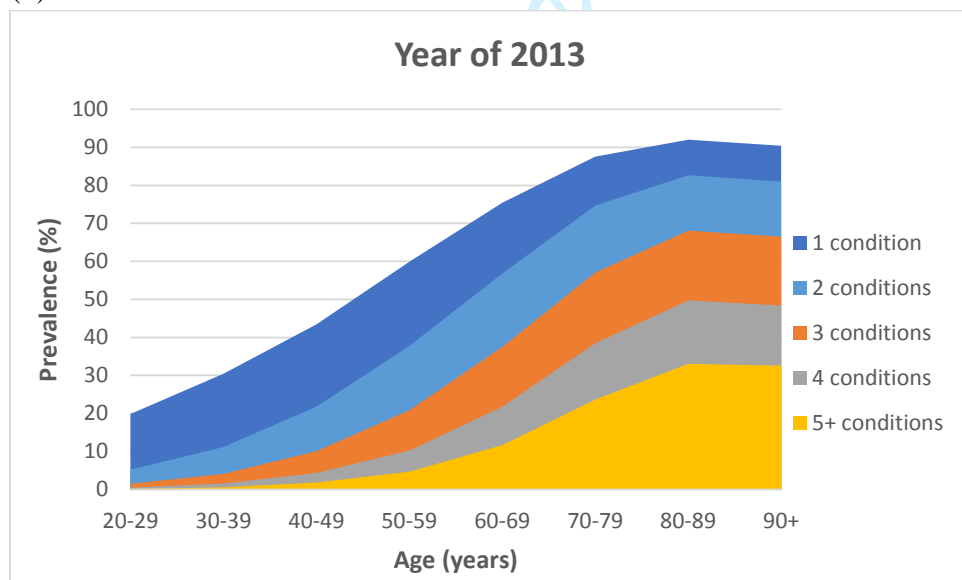

# BMJ Open

## The Increasing Age- and Gender-Specific Burden and Complexity of Multimorbidity in Taiwan, 2003-2013: A Cross-Sectional Study based on Nationwide Claims Data

|                                 |                                                                                                                                                                                                                                                                                                                                                                                                                                                                         |
|---------------------------------|-------------------------------------------------------------------------------------------------------------------------------------------------------------------------------------------------------------------------------------------------------------------------------------------------------------------------------------------------------------------------------------------------------------------------------------------------------------------------|
| Journal:                        | <i>BMJ Open</i>                                                                                                                                                                                                                                                                                                                                                                                                                                                         |
| Manuscript ID                   | bmjopen-2018-028333.R2                                                                                                                                                                                                                                                                                                                                                                                                                                                  |
| Article Type:                   | Research                                                                                                                                                                                                                                                                                                                                                                                                                                                                |
| Date Submitted by the Author:   | 30-Apr-2019                                                                                                                                                                                                                                                                                                                                                                                                                                                             |
| Complete List of Authors:       | Hu, Rey-Hsing ; National Taiwan Ocean University, Department of Computer Science and Engineering<br>Hsiao, Fei-Yuan; National Taiwan University, Graduate Institute of Clinical Pharmacy<br>Chen, Li-Ju; National Taiwan University, Health Data Research Center<br>Huang, Pei-Ting; National Taiwan Ocean University, Department of Computer Science and Engineering<br>Hsu, William; National Taiwan Ocean University, Department of Computer Science and Engineering |
| <b>Primary Subject Heading</b>: | Epidemiology                                                                                                                                                                                                                                                                                                                                                                                                                                                            |
| Secondary Subject Heading:      | Public health                                                                                                                                                                                                                                                                                                                                                                                                                                                           |
| Keywords:                       | disease burden, multimorbidity, National Health Insurance Research Database                                                                                                                                                                                                                                                                                                                                                                                             |
|                                 |                                                                                                                                                                                                                                                                                                                                                                                                                                                                         |

SCHOLARONE™  
Manuscripts

**Revised Manuscript (clean)****The Increasing Age- and Gender-Specific Burden and Complexity of  
Multimorbidity in Taiwan, 2003-2013: A Cross-Sectional Study  
based on Nationwide Claims Data**

Rey-Hsing Hu, M.S.<sup>1</sup>, Fei-Yuan Hsiao, PhD<sup>2,3,4</sup>, Li-Ju Chen, M.S.<sup>5</sup>,

Pei-Ting Huang, M.S.<sup>1</sup>, William W.Y. Hsu, PhD<sup>1\*</sup>

<sup>1</sup>Department of Computer Science and Engineering, National Taiwan Ocean  
University, Keelung, Taiwan;

<sup>2</sup>Graduate Institute of Clinical Pharmacy, College of Medicine, National Taiwan  
University, Taipei, Taiwan;

<sup>3</sup>School of Pharmacy, College of Medicine, National Taiwan University, Taipei,  
Taiwan;

<sup>4</sup>Department of Pharmacy, National Taiwan University Hospital, Taipei, Taiwan.

<sup>5</sup>Health Data Research Center, National Taiwan University, Taipei, Taiwan

\* Correspondence:

William W.Y. Hsu, Assistant professor

Department of Computer Science and Engineering, National Taiwan Ocean  
University, Keelung, Taiwan

E-mail: wwyhsu@ntou.edu.tw

1  
2  
3  
4 **Running head:** Burden and Complexity of Multimorbidity in Taiwan, 2003-2013  
5  
6  
7  
8  
9

10 **Funding:**  
11  
12

13 Dr. Hsu WY received research assistantships from a research project (MOST107-  
14  
15  
16 2221-E-019-037-MY3) sponsored by the Ministry of Science and Technology  
17  
18  
19 Taiwan. Dr. Hsiao FY received research assistantships from a research project  
20  
21  
22 (MOST 104-2410-H-002-225-MY3) sponsored by the Ministry of Science and  
23  
24  
25 Technology Taiwan.  
26  
27

28 **Disclosure of Conflicts of Interests:**  
29  
30

31 None.  
32  
33

34 **Author Contributions:**  
35  
36

37 Hu RH, Hsiao FY, Chen LJ, and Hsu WY contributed to the study concept and  
38  
39  
40 design. Hsiao FY, Hu RH, and Huang PT acquired and analyzed the data. Hsiao FY  
41  
42  
43 and Chen LJ interpreted the data. Hu RH, Hsiao FY, Chen LJ, Huang PT, and Hsu  
44  
45  
46 WY drafted the manuscript. Hsiao FY and Hsu WY revised the manuscript. All the  
47  
48  
49 authors read and approved the final manuscript.  
50  
51  
52  
53  
54

55 **Keywords:** disease burden, multimorbidity, National Health Insurance Research  
56  
57  
58 Database  
59  
60

## ABSTRACT

### Objectives

Although there is accumulating evidence regarding multimorbidity in Western countries, in Asian countries, this information is very limited. This study aimed to estimate the population-based, age- and gender-specific prevalence and trends of multimorbidity in the Taiwanese population.

### Design

This was a cross-sectional study based on claims data (National Health Insurance Research Database, Taiwan).

### Participants

The participants included a subset of the National Health Insurance Research Database, which contains claims data for 2 million randomly selected beneficiaries (~10% of the total population) under Taiwan's mandatory National Health Insurance system.

### Outcome measurements

The prevalence of multimorbidity in different age groups and in both sexes in 2003 and 2013 was reported. We analyzed data on the prevalence of 20 common diseases in each age group and for both sexes. To investigate the clustering effect, we used graphical displays to analyze the likelihood of co-occurrence with 1, 2, 3, and 4 or



1  
2  
3  
4 more other diseases for each selected disease in 2003 and 2013.  
5  
6

## 7 **Results**

8  
9  
10 The prevalence of multimorbidity (two or more diseases) was 20.07% in 2003 and  
11  
12 30.44% in 2013. In 2013, the prevalence varied between 5.21% in patients aged 20-29  
13  
14  
15 years and 80.96% in those aged 80-89 years. In patients aged 50-79 years, the  
16  
17 prevalence of multimorbidity was higher in women than in men. In men, the  
18  
19 prevalence of chronic pulmonary disease and cardiovascular-related diseases was  
20  
21  
22 prevalence of chronic pulmonary disease and cardiovascular-related diseases was  
23  
24 predominant, while in women, the prevalence of osteoporosis, arthritis, cancer, and  
25  
26 psychosomatic disorders was predominant. Co-occurring diseases varied across  
27  
28  
29 different age and gender groups.  
30  
31  
32  
33

## 34 **Conclusions**

35  
36  
37 The burden of multimorbidity is increasing and becoming more complex in Taiwan,  
38  
39 and it was found to vary across different age and gender groups. Fulfilling the needs  
40  
41  
42 of individuals with multimorbidity requires collaborative work between healthcare  
43  
44  
45 providers and needs to take the age and gender disparities of multimorbidity into  
46  
47  
48  
49 account.  
50  
51  
52  
53  
54  
55  
56  
57  
58  
59  
60

## Strengths and limitations of this study

- This is the first nationwide study conducted in Taiwan to assess the age- and gender-specific burden and complexity of multimorbidity and was carried out between 2003 and 2013.
- Multimorbidity was defined using existing methods to classify and consider geographic or ethnic discrepancies between Western and Asian countries.
- We identified multimorbidity based on the diagnoses recorded at outpatient or inpatient visits. However, only up to three or five diagnoses were allowed to be recorded in each outpatient or inpatient visit in the NHIRD; therefore, the prevalence of multimorbidity may be underestimated

## Introduction

Multimorbidity, defined as the coexistence of two or more chronic health conditions in the same person at the same time, has become a significant challenge to healthcare systems worldwide. Previous studies have reported multimorbidity to be associated with worse clinical outcomes, a poorer quality of life and increased medical expenditures at the individual level.<sup>1 2</sup> At the national level, multimorbidity also incurs a significant social and economic burden due to complex health and welfare demands and the associated costs of caring for individuals with multimorbidity.<sup>1 2</sup>. These demands are expected to increase as societies age, as the prevalence of multimorbidity increases with age.<sup>3</sup> Nevertheless, effective strategies to manage multimorbidity remain elusive. This may be due to the single-disease paradigm in the current clinical setting, which may result in fragmented care for patients who manifest multimorbidity.

To manage multimorbidity, it is necessary to measure the burden of multimorbidity, but the phenomenon of multimorbidity is not well understood. A simple count of diseases in each patient, either through self-reporting<sup>4</sup> or through extracting information from electronic medical records using lists of diagnostic codes<sup>5-8</sup>, has been the most common approach. The extrapolation of the abovementioned studies,

1  
2  
3  
4 however, is difficult due to several limitations. First, most of these estimates came  
5  
6  
7 from selected medical institutions <sup>3 9-12</sup> or are limited to the specific population such  
8  
9  
10 as the elderly <sup>3</sup>. Some studies used a survey to ascertain the prevalence of  
11  
12  
13 multimorbidity in patients who visited their general practitioners <sup>13 14</sup>. However,  
14  
15  
16 population-based estimates are usually very limited. Second, the lists of diagnoses  
17  
18  
19 differ substantially between studies <sup>6 15 16</sup>. To the best of our knowledge, there is  
20  
21  
22 currently no single set of codes that have been consistently used to identify patients  
23  
24  
25 with multimorbidity. Third, the prevalence of multimorbidity in Asian countries is  
26  
27  
28 very limited, while the prevalence of multimorbidity may vary ethnically or  
29  
30  
31 geographically. Based on two systematic reviews conducted by Pati S et al <sup>17</sup> and Hu  
32  
33  
34 X et al <sup>18</sup>, as well as on other studies <sup>19-21</sup>, the available evidence of multimorbidity in  
35  
36  
37 Asian countries is limited to specific areas in one country <sup>19-21</sup> (i.e., no population-  
38  
39  
40 based data were available). Evidence is also limited by sample size (mostly including  
41  
42  
43 only hundreds of people) <sup>19-21</sup> and by the method used to measure multimorbidity  
44  
45  
46 (most studies used self-reported data). Similarly, previous studies have mainly  
47  
48  
49 focused on the prevalence of multimorbidity in the elderly <sup>17 18 20</sup>. In addition, most of  
50  
51  
52 existing studies were cross-sectional one-time measurements of the prevalence of  
53  
54  
55 multimorbidity <sup>17 18 20</sup> and did not investigate the burden of multimorbidity over time.  
56  
57  
58  
59  
60

1  
2  
3  
4 To fill the current knowledge gap, this study aimed to estimate the population-based,  
5  
6  
7 age- and gender-specific prevalence and trends of multimorbidity using Taiwan's  
8  
9  
10 National Health Insurance Research Database (NHIRD).  
11  
12  
13  
14  
15  
16  
17  
18  
19  
20  
21  
22  
23  
24  
25  
26  
27  
28  
29  
30  
31  
32  
33  
34  
35  
36  
37  
38  
39  
40  
41  
42  
43  
44  
45  
46  
47  
48  
49  
50  
51  
52  
53  
54  
55  
56  
57  
58  
59  
60

For peer review only

## Methods

### Data sources

This population-based cross-sectional study was conducted using administrative claims data from Taiwan's National Health Insurance Research Database (NHIRD).

The NHIRD is a nationwide claims-based database comprising anonymous eligibility and enrollment information, as well as claims for outpatient visits, admissions, procedures and prescription medications of more than 99% of the entire population (23 million) of Taiwan <sup>22</sup>.

We used a subset of the NHIRD that contained claims data for 2 million randomly selected beneficiaries to create an 11-year (2003-2013) panel of claims for analysis. In this study, we used two subsets of the NHIRD—the 2005 and 2010 Longitudinal Health Insurance Databases (LHID)—as our data source. These two datasets were made up of claims data on one million beneficiaries that were randomly sampled by the National Health Research Institute (NHRI), Taiwan. The one million beneficiaries in LHID 2005 were randomly selected from the year 2005 Registry for Beneficiaries of the NHIRD, which includes registration data of approximately 25.68 million beneficiaries of the National Health Insurance (NHI) program during the year 2005. The one million beneficiaries in LHID 2010 were randomly selected from the year 2010 Registry for

1  
2  
3  
4 Beneficiaries of the NHIRD, which includes registration data of approximately 27.38  
5  
6  
7 million beneficiaries of the NHI program during the year 2010. According to the  
8  
9  
10 statistics provided by the NHRI, there were no significant differences in the gender  
11  
12  
13 distribution between patients in the LHID 2005 subset and the original NHIRD  
14  
15  
16 ( $\chi^2=0.008$ ,  $df=1$ ,  $p\text{-value}=0.931$ ) or between those in the LHID 2010 subset and the  
17  
18  
19 original NHIRD ( $\chi^2=0.067$ ,  $df=1$ ,  $p\text{-value}=0.796$ )<sup>23</sup>. Therefore, the two subsets were  
20  
21  
22 thought to be representative of the original NHIRD, and the results obtained suggested  
23  
24  
25 generalizability to the whole Taiwanese population. The sampling and data linkage  
26  
27  
28 process is provided in **Supplementary Figure S1**.

29  
30  
31  
32  
33  
34 A total of two million individuals, which comprised approximately 10% of the total  
35  
36  
37 population in Taiwan, constituted the study population.

### 42 43 **Ethical statement**

44  
45  
46 The identification numbers for all of the entries in the NHIRD were encrypted to  
47  
48  
49 protect the privacy of the individual patients. The study protocol was approved by the  
50  
51  
52 Institutional Review Board of the National Taiwan University Hospital (National  
53  
54  
55 Taiwan University Hospital Research Ethics Committee No. 201403069W).

## Patient and public involvement

Patients were not involved in the design or conduct of this study.

## Identification of common diseases

We defined cases as patients who had at least three diagnoses from among 20 common diseases at outpatient or inpatient visits during the study period. To ensure the specificity of every disease, only those who had at least 3 outpatient or 1 inpatient claim records of that specified diagnosis code in one year were considered as having that specified disease. This algorithm was adopted from many published studies that have used NHIRD to identify comorbidities<sup>24-26</sup>. For example, one individual must have at least three different visits for hypertension (e.g., March 1, May 2, and July 15, 2003) to be considered as having hypertension in that year. The same algorithm was applied to other disease. Therefore, if this person also had at least three different visits for diabetes mellitus, then he or she was defined as having two diseases (multimorbidity) in that year. Based on our algorithm, the diseases we selected in this study were chronic diseases.

Similar with most previous studies focusing on multimorbidity, we also specified multimorbidity in this study as patients who concurrently suffered from two or more of



1  
2  
3  
4 the 20 common diseases. The 20 common diseases included hypertension, diabetes,  
5  
6  
7 congestive heart failure, coronary syndrome, cardiac dysrhythmias, peripheral vascular  
8  
9  
10 disease, cerebrovascular disease, chronic pulmonary disease, renal disease, liver  
11  
12  
13 disease, dementia, other neurological disorders, digestive disorders, osteoporosis,  
14  
15  
16 arthritis (including rheumatoid arthritis), anxiety dissociative and somatoform disorders,  
17  
18  
19 bipolar disorder, depression, schizophrenia and psychotic disorders, and cancer. The  
20  
21  
22 detailed set of diagnostic codes regarding the definition of these common diseases is  
23  
24  
25 presented in **Supplementary Table S1**. These diseases were selected based on their  
26  
27  
28 disease burden, which impacts the whole of society regarding their considerable cost,  
29  
30  
31 the requirement for long-term care, reduced health-related quality of life,  
32  
33  
34 hospitalization, or death, as illustrated in previous studies <sup>6 25 27</sup>. Three epidemiologists  
35  
36  
37 with clinical and research expertise in chronic diseases and multimorbidity took part in  
38  
39  
40 the discussions of the literature regarding the existing definitions of chronic diseases  
41  
42  
43 across scientific papers. There was a lack of consensus over what diseases should be  
44  
45  
46 included in the definition of multimorbidity. Therefore, in the current study, we  
47  
48  
49 included all those diseases that were included in two previous multimorbidity studies <sup>6</sup>  
50  
51  
52 <sup>27</sup>, as well as those from a Taiwanese study (our previous study that involved a geriatric  
53  
54  
55 specialist) evaluating the association between multimorbidity and unplanned  
56  
57  
58 hospitalizations, admission to intensive care units, and mortality <sup>25</sup>. In this way, we  
59  
60

1  
2  
3  
4 believed that the list of diseases which we adopted to define multimorbidity was capable  
5  
6  
7 of reflecting the disease burden of the Taiwanese population.  
8  
9

### 10 11 12 13 **Statistical Analysis** 14

15  
16 We reported descriptive data on the prevalence of multimorbidity in different age  
17  
18 groups (categorized into the following eight groups: 20-29, 30-39, 40-49, 50-59, 60-69,  
19  
20  
21 70-79, 80-89, and 90+ years) and both sexes (men and women) in the years 2003 and  
22  
23  
24 2013 (annual point prevalence). Chi-square tests were used to compare prevalences in  
25  
26  
27 the years 2003 and 2013. The prevalence of multimorbidity was calculated by dividing  
28  
29  
30 the number of patients afflicted with multimorbidity by the population size in each age  
31  
32  
33 group regarding the degree of multimorbidity (grouped into 2, 3, 4, and 5+). We further  
34  
35  
36 analyzed data on the prevalence of each of the 20 common diseases in each age group  
37  
38  
39 and sex. The individual prevalence was the estimated fraction (percentage, %), with the  
40  
41  
42 number of patients with each disease in each age group and sex as the numerator and  
43  
44  
45 the population size of each age group and sex as the denominator.  
46  
47  
48  
49  
50

51  
52 To analyze the clustering effect, we used graphical displays of the likelihood of co-  
53  
54  
55 occurrence with 1, 2, 3, and 4 or more other diseases for each selected disease in the  
56  
57  
58 years 2003 and 2013. The likelihood was the estimated proportion of the number of  
59  
60

1  
2  
3  
4 patients suffering from the same disease with concurrent 1, 2, 3, and 4 or more other  
5  
6  
7 diseases divided by the number of patients with a specific disease. We also used  
8  
9  
10 graphics to illustrate differences in the prevalence of multimorbidity and the clustering  
11  
12  
13 effect between both sexes and among age groups in 2003 and 2013. All data in this  
14  
15  
16 study were analyzed using the Python programming language with Mongo database  
17  
18  
19 software, version 3.6.4 and 4.0.2.  
20  
21  
22  
23  
24  
25  
26  
27  
28  
29  
30  
31  
32  
33  
34  
35  
36  
37  
38  
39  
40  
41  
42  
43  
44  
45  
46  
47  
48  
49  
50  
51  
52  
53  
54  
55  
56  
57  
58  
59  
60

## Results

In general, the prevalence of at least one of the 20 common diseases was 37.23% in 2003, and an approximately ten percent increase was observed in 2013 (48.97%, **Table 1**). The prevalence of at least one disease ranged from 16.74% in patients aged 20-29 years to 78.05% in those aged 80-89 years in 2003. In 2013, the prevalence varied between 19.85% in patients aged 20-29 years and 92.01% in those aged 80-89 years. Increases in the prevalence of at least one disease from 2003 to 2013 were observed in all age groups (**Table 1, Supplementary Figure S2**). Regarding multimorbidity, the increasing prevalence across all age groups and the different intensities of multimorbidity is of great concern. For instance, the prevalence of three of the 20 common diseases was 30.39% in patients aged 60-69 years in 2003, and an approximately seven percent increase in prevalence was observed in 2013. In patients aged 90 years or more, the increase was even more significant. Compared to the prevalence of three diseases in 2003 (33.04%, **Table 1, Supplementary Figure S2**), in 2013 it had nearly doubled (66.52%, **Table 1, Supplementary Figure S2**).

A dramatic increase in the prevalence of multimorbidity from 2003 to 2013 was found for all age groups, especially in those aged 90 years or more, for both men and women (**Figure 1**). Patterns of sex differences in the prevalence of multimorbidity were similar

1  
2  
3  
4 between 2003 and 2013. Specifically, the prevalences of multimorbidity were  
5  
6  
7 comparable between men and women in patients aged 49 years or younger. In patients  
8  
9  
10 aged between 50 and 79 years, however, the prevalence of multimorbidity was higher  
11  
12  
13 in women than in men. In patients aged 80-89 years, the sex difference in the prevalence  
14  
15  
16 of multimorbidity was subtle. In patients aged 90 years or more, the prevalence of  
17  
18  
19 multimorbidity was much higher in men than in women (**Figure 1**).

20  
21  
22  
23  
24  
25 The prevalence of each of the 20 common diseases is presented in **Table 2**. The  
26  
27  
28 prevalence of all 20 diseases remained comparable or increased in all age groups  
29  
30  
31 between the years 2003 and 2013. A significantly increased prevalence was observed  
32  
33  
34 for cancer, dementia, cerebrovascular disease, and several cardiovascular-related  
35  
36  
37 diseases, including hypertension, diabetes, congestive heart failure, cardiac  
38  
39  
40 dysrhythmias, and peripheral vascular disease. The most frequently observed diseases  
41  
42  
43 in the Taiwanese population consisted of hypertension, other neurological disorders,  
44  
45  
46 digestive disorders, and arthritis (including rheumatoid arthritis). Over half the patients  
47  
48  
49 greater than 70 years in 2013 were afflicted with hypertension, and nearly one-third of  
50  
51  
52 those suffered from other neurological disorders, digestive disorders, or arthritis  
53  
54  
55 (including rheumatoid arthritis). Although the prevalence of cancer and dementia was  
56  
57  
58 generally low in Taiwan, the disease burden caused by these two diseases cannot be  
59  
60

1  
2  
3  
4 overlooked. Nearly one-fifth of patients aged 90 years or older were affected by  
5  
6  
7 dementia, and nearly one-sixth of patients aged 80 years or older were afflicted with  
8  
9  
10 cancer in 2013. Additionally, there was a striking increasing trend in the prevalence of  
11  
12  
13 these two diseases in older patients.  
14  
15  
16  
17  
18

19 As shown in **Table 3**, in general, the prevalence of each common disease increased  
20  
21  
22 between the years 2003 and 2013 in both men and women. In men, the prevalence of  
23  
24  
25 chronic pulmonary disease and cardiovascular-related diseases, including hypertension,  
26  
27  
28 congestive heart failure, and peripheral vascular disease was predominant. In women,  
29  
30  
31 the prevalence of osteoporosis, arthritis (including rheumatoid arthritis), cancer, and  
32  
33  
34 psychosomatic disorders, including depression, anxiety, and bipolar disorder was  
35  
36  
37 predominant. Interestingly, the prevalence of dementia in men was slightly higher than  
38  
39  
40 in women in 2003; however, in 2013, the condition was much higher in women than in  
41  
42  
43 men.  
44  
45  
46  
47  
48

49 In **Figure 2**, we depicted sex differences in the prevalence of multimorbidity for  
50  
51  
52 individuals suffering from each common disease in 2003 and 2013. Generally,  
53  
54  
55 compared to 2003, multimorbidity was more frequently observed in 2013 in both sexes  
56  
57  
58 for all common diseases. Except for bipolar disorder, and schizophrenia and psychotic  
59  
60

1  
2  
3  
4 disorders, which were the least likely to occur with other diseases, the other studied  
5  
6  
7 diseases might be comorbid to some extent. In 2003, patients with anxiety, dissociative  
8  
9  
10 and somatoform disorders, digestive disorders, and hypertension were most likely to  
11  
12  
13 suffer from other diseases concurrently, but the differences by sex were minor. In 2013,  
14  
15  
16 patients with these diseases were most likely to have other diseases at the same time;  
17  
18  
19 however, the sex differences were more noticeable. Specifically, a higher proportion of  
20  
21  
22 women suffering from anxiety, dissociative and somatoform disorders, and digestive  
23  
24  
25 disorders have greater odds of having other concurrent diseases. A profound sex  
26  
27  
28 difference in multimorbidity could also be observed in patients with other diseases,  
29  
30  
31 including arthritis (including rheumatoid arthritis), osteoporosis, other neurological  
32  
33  
34 disorders, and liver disease, where women with the first three of these conditions had a  
35  
36  
37 higher prevalence of other concurrent diseases.  
38  
39  
40  
41  
42  
43  
44  
45  
46  
47  
48  
49  
50  
51  
52  
53  
54  
55  
56  
57  
58  
59  
60

## Discussion

To the best of our knowledge, this population-based study is the largest and most comprehensive epidemiologic study to provide age- and gender-specific information on multimorbidity in the Taiwanese population. Previous studies of this topic have been limited to Western countries, such as Canada<sup>6</sup> or Australia<sup>13</sup>. Nevertheless, the etiology of multimorbidity may have geographical discrepancies. Our study also fills the knowledge gap of existing studies conducted in Asian countries<sup>17 18</sup> by providing nationwide estimates of multimorbidity across different age groups and illuminating the 10-year changes in the multimorbidity burden, which was not available from existing studies. This information is therefore fundamental for constructing national policies to combat the burden of multimorbidity, particularly in Asian countries. Our study also provides in-depth analyses of each selected disease and its concomitant comorbidities. This study could thus serve as a valuable reference for formulating strategic disease management plans.

We found that the prevalence of multimorbidity increased in the 10-year follow-up period. This increase is reasonable considering the aging population<sup>28</sup> and is consistent with a previous study conducted in Ontario<sup>6</sup>. The prevalence of multimorbidity among residents of Ontario rose from 17.4% in 2003 to 24.3% in



1  
2  
3  
4 2009, a 40% increase. In our study, the prevalence of multimorbidity rose from  
5  
6  
7 20.07% in 2013 to 30.44% in 2009, a 51.6% increase. The different magnitudes of the  
8  
9  
10 increase could have resulted from the various lists of diseases selected to assess  
11  
12  
13 multimorbidity; the Ontario study included 16 common chronic conditions<sup>6</sup>, while our  
14  
15  
16 study included 20 common chronic conditions. However, the rate of demographic  
17  
18  
19 aging in the two different populations may better explain the discrepancies. The  
20  
21  
22 population is aging rapidly in Taiwan. At the end of 2010, 11% of Taiwan's  
23  
24  
25 population was 65 years or older. The ratio of elderly people reached 14% (the  
26  
27  
28 threshold for an “aged” society) in 2017, and the estimated ratio is expected to  
29  
30  
31 increase to 20% (the threshold for a “superaged” society) in Taiwan by 2025 <sup>29</sup>.

32  
33  
34  
35  
36  
37 An understanding of multimorbidity, particularly in the elderly, is therefore very  
38  
39  
40 important for almost every country. In our study, we found that the prevalences of  
41  
42  
43 multimorbidity (2+ diseases) in people aged 60-69, 70-79 and 80-89 were 56.84%,  
44  
45  
46 74.64%, and 82.64%, respectively, in 2013. The prevalences of multimorbidity (3+  
47  
48  
49 diseases) in people aged 60-69, 70-79 and 80-89 were 37.49%, 57.04%, and 68.10%,  
50  
51  
52 respectively, in 2013. Facing such tremendous and complex medical demands, it is  
53  
54  
55 necessary to reform the current “single-disease or specialty” paradigm into a  
56  
57  
58 “integrated and comprehensive medical care” model <sup>30</sup>. We also found that the  
59  
60

1  
2  
3  
4 combination and intensity of multimorbidity differed in older men and women. This  
5  
6  
7 finding may further indicate different medical needs for older men and women, and  
8  
9  
10 gender-specific care plans for older people may be warranted. Our estimates can serve  
11  
12  
13 as a reference for countries facing a similar rapid speed of population aging to better  
14  
15  
16 allocate medical and social welfare resources, including for Taiwan, our neighbor  
17  
18  
19 country Japan <sup>31</sup> or other European countries <sup>32</sup>.

20  
21  
22  
23  
24  
25 In addition to older people, the prevalence of multimorbidity among the younger  
26  
27  
28 population warrants special attention. As most studies of multimorbidity have focused  
29  
30  
31 on older adults <sup>33 34</sup>, evidence regarding this issue in young adults is very limited. In  
32  
33  
34 our study, the prevalences of multimorbidity (2+ diseases) in people aged 30-39, 40-  
35  
36  
37 49 and 50-89 were 11.18%, 21.76%, and 37.75%, respectively, in 2013. This indicates  
38  
39  
40 the need for early intervention in those who already suffer from multimorbidity in  
41  
42  
43 middle-age, as the intensity of multimorbidity gradually increases, as shown in our  
44  
45  
46 study. Lifestyle factors in middle-age, such as smoking, drinking, exercise and diet,  
47  
48  
49 have been reported to be associated with multimorbidity <sup>35</sup>.

50  
51  
52  
53  
54  
55 Most importantly, our study contributes to a better understanding of the in-depth  
56  
57  
58 details of multimorbidity. In addition to revealing very distinct predominant diseases  
59  
60

1  
2  
3  
4 in men and women, we also revealed the burden of multimorbidity in each common  
5  
6  
7 chronic condition. From a clinical perspective, our findings can help further stratify  
8  
9  
10 patients within specific disease groups. For example, patient care for those with  
11  
12  
13 diabetes mellitus and one other comorbid condition would be very different from  
14  
15  
16 patients with diabetes mellitus and four other comorbid conditions. From a policy  
17  
18  
19 perspective, our findings can help allocate medical resources more efficiently. Our  
20  
21  
22 previous studies have also supported this stratification strategy (identifying high-risk  
23  
24  
25 groups), and we found that an increase in diabetic complications was positively  
26  
27  
28 associated with an increased risk of hospitalization and increased healthcare costs <sup>36</sup>  
29

30  
31 37.  
32  
33  
34  
35  
36

37 Here, we have provided epidemiologic information of age- and gender-specific  
38  
39  
40 multimorbidity; however, there are some limitations due to the nature of the claims  
41  
42  
43 data. First, we identified the disease based on the diagnoses recorded at the outpatient  
44  
45  
46 or inpatient visits. However, only up to three or up to five diagnoses were allowed to  
47  
48  
49 be recorded for each outpatient or inpatient visit, respectively; therefore, the  
50  
51  
52 prevalence of multimorbidity may be underestimated. Second, as we used the  
53  
54  
55 NHIRD, the estimations regarding multimorbidity were from the perspective of the  
56  
57  
58 national insurance system. Patients who pay out-of-pocket for their healthcare are not  
59  
60

1  
2  
3  
4 recorded in the NHIRD. Third, as there is no consensus on the number of diseases  
5  
6  
7 used to identify multimorbidity, epidemiological comparisons with different countries  
8  
9  
10 are difficult. For example, a systematic review conducted by Pati S et al <sup>17</sup> revealed  
11  
12  
13 that among 13 studies, the number of health conditions analyzed per study varied  
14  
15  
16 from 7 to 22, with the prevalence of multimorbidity varying from 4.5% to 83%.  
17  
18  
19  
20  
21

22 In summary, our study is the first population-based study conducted in Taiwan that  
23  
24  
25 provides age- and gender-specific information on multimorbidity. The burden of  
26  
27  
28 multimorbidity is increasing and becoming more complex in Taiwan. Providing for  
29  
30  
31 the needs of individuals with multimorbidity requires collaborative work across  
32  
33  
34 healthcare providers and may need to take into account age and gender disparities.  
35  
36  
37  
38  
39  
40  
41  
42  
43  
44  
45  
46  
47  
48  
49  
50  
51  
52  
53  
54  
55  
56  
57  
58  
59  
60

## Acknowledgements

We thank the National Health Insurance Administration (NHIA) and National Health Research Institutes (NHRI) for making the databases used in this study available.

However, the content of this article does not represent any official position of the NHIA or NHRI. The authors had full access to all of the data in the study and take responsibility for the integrity of the data and the accuracy of the data analysis.

## Data sharing statement

Data for this study were provided by the National Health Insurance Administration, Taiwan, following ethical approval, and may be available to other researchers who meet data access requirements.

## Figure legends

**Figure 1. Prevalence of multimorbidity in Taiwan by number of common diseases \*, sex, age group, and year. (a) Men and women in 2003. (b) Men and women in 2013.**

**Figure 2. Prevalence of multimorbidity in Taiwan within common diseases, by sex and year.**

## References

1. Huntley A, Johnson R, Purdy S, et al. Measures of multimorbidity and morbidity burden for use in primary care and community settings: a systematic review and guide. *Ann Fam Med* 2012;**10**(2):134-41.
2. Marengoni A, Angleman S, Melis R, et al. Aging with multimorbidity: a systematic review of the literature. *Ageing Res Rev* 2011;**10**(4):430-39.
3. Schram M, Frijters D, van de Lisdonk E, et al. Setting and registry characteristics affect the prevalence and nature of multimorbidity in the elderly. *J Clin Epidemiol* 2008;**61**(11):1104-12.
4. Taylor A, Price K, Gill T, et al. Multimorbidity - not just an older person's issue. Results from an Australian biomedical study. *BMC Public Health* 2010(**10**):718.
5. Barnett K, Mercer S, Norbury M, et al. Epidemiology of multimorbidity and implications for health care, research, and medical education: a cross-sectional study. *Lancet* 2012;**380**(9836):37-43.
6. Pefoyo A, Bronskill S, Gruneir A, et al. The increasing burden and complexity of multimorbidity. *BMC Public Health* 2015(**15**):415.
7. van Oostrom S, Picavet H, de Bruin S, et al. Multimorbidity of chronic diseases and health care utilization in general practice. *BMC Fam Pract* 2014(**15**):61.
8. van Oostrom S, Picavet H, van Gelder B, et al. Multimorbidity and comorbidity in the Dutch population - data from general practices. *BMC Public Health* 2012(**12**):715.
9. Araujo M, Silva M, Galvao T, et al. Prevalence and patterns of multimorbidity in Amazon Region of Brazil and associated determinants: a cross-sectional study. *BMJ Open* 2018;**8**(11):e023398.
10. Brett T, Arnold-Reed D, Popescu A, et al. Multimorbidity in patients attending 2 Australian primary care practices. *Ann Fam Med* 2013;**11**(6):535-42.
11. Britt H, Harrison C, Miller G, et al. Prevalence and patterns of multimorbidity in Australia. *Med J Aust* 2008;**189**(2):72-77.
12. Excoffier S, Herzig L, N'Goran A, et al. Prevalence of multimorbidity in general practice: a cross-sectional study within the Swiss Sentinel Surveillance System (Sentinella). *BMJ Open* 2018;**8**(3):e019616.
13. Harrison C, Henderson J, Miller G, et al. The prevalence of complex multimorbidity in Australia. *Aust N Z J Public Health* 2016;**40**(3):239-44.
14. Harrison C, Henderson J, Miller G, et al. The prevalence of diagnosed chronic conditions and multimorbidity in Australia: A method for estimating population prevalence from general practice patient encounter data. *PLoS One* 2017;**12**(3):e0172935.

15. Cassell A, Edwards D, Harshfield A, et al. The epidemiology of multimorbidity in primary care: a retrospective cohort study. *Br J Gen Pract* 2018;**68**(669):e245-e51.
16. Stanley J, Semper K, Millar E, et al. Epidemiology of multimorbidity in New Zealand: a cross-sectional study using national-level hospital and pharmaceutical data. *BMJ Open* 2018;**8**(5):e021689.
17. Pati S, Swain S, Hussain MA, et al. Prevalence and outcomes of multimorbidity in South Asia: a systematic review. *BMJ Open* 2015;**5**(10):e007235.
18. Hu X, Huang J, Lv Y, et al. Status of prevalence study on multimorbidity of chronic disease in China: systematic review. *Geriatr Gerontol Int* 2015;**15**(1):1-10.
19. Ge L, Yap CW, Heng BH. Sex differences in associations between multimorbidity and physical function domains among community-dwelling adults in Singapore. *PLoS One* 2018;**13**(5):e0197443.
20. Mini GK, Thankappan KR. Pattern, correlates and implications of non-communicable disease multimorbidity among older adults in selected Indian states: a cross-sectional study. *BMJ Open* 2017;**7**(3):e013529.
21. Pati S, Hussain MA, Swain S, et al. Development and Validation of a Questionnaire to Assess Multimorbidity in Primary Care: An Indian Experience. *Biomed Res Int* 2016;**2016**:6582487.
22. Hsiao FY, Yang CL, Huang YT, et al. Using Taiwan's national health insurance research databases for pharmacoepidemiology research. *J Food Drug Anal* 2007;**15**(2):99-108.
23. National Health Research Institute, Taiwan. National Health Insurance Research Database, Taiwan. Available from: [https://nhird.nhri.org.tw/en/Data\\_Subsets.html](https://nhird.nhri.org.tw/en/Data_Subsets.html). Accessed August 22 2018.
24. Chen CY, Wu VC, Lin CJ, et al. Improvement in Mortality and End-Stage Renal Disease in Patients With Type 2 Diabetes After Acute Kidney Injury Who Are Prescribed Dipeptidyl Peptidase-4 Inhibitors. *Mayo Clin Proc* 2018;**93**(12):1760-74.
25. Wen YC, Chen LK, Hsiao FY. Predicting mortality and hospitalization of older adults by the multimorbidity frailty index. *PLoS One* 2017;**12**(11):e0187825.
26. Dai YX, Wang SC, Chou YJ, et al. Smoking, but not alcohol, is associated with risk of psoriasis in a Taiwanese population-based cohort study. *J Am Acad Dermatol* 2019;**80**(3):727-34.
27. Lenzi J, Avaldi V, Rucci P, et al. Burden of multimorbidity in relation to age, gender and immigrant status: a cross-sectional study based on administrative data. *BMJ Open* 2016;**6**(12):e012812.

- 1
- 2
- 3
- 4 28. Lu WH, Lee WJ, Chen LK, et al. Comparisons of annual health care utilization,
- 5 drug consumption, and medical expenditure between the elderly and general
- 6 population in Taiwan. *J Clin Gerontol Geriatr* 2016;**7**(2):44-47.
- 7
- 8 29. National Development Council. Population Projections for R.O.C.
- 9 (Taiwan):2014-2060. Available from:
- 10 [https://www.ndc.gov.tw/Content\\_List.aspx?n=84223C65B6F94D72](https://www.ndc.gov.tw/Content_List.aspx?n=84223C65B6F94D72). Accessed
- 11 November 21 2018.
- 12
- 13
- 14 30. Arai H, Ouchi Y, Toba K, et al. Japan as the front-runner of super-aged societies:
- 15 Perspectives from medicine and medical care in Japan. *Geriatr Gerontol Int*
- 16 2015;**15**(6):673-87.
- 17
- 18 31. Arai H, Ouchi Y, Yokode M, et al. Toward the realization of a better aged
- 19 society: messages from gerontology and geriatrics. *Geriatr Gerontol Int*
- 20 2012;**12**(1):16-22.
- 21
- 22
- 23 32. Perales J, Martin S, Ayuso-Mateos J, et al. Factors associated with active aging
- 24 in Finland, Poland, and Spain. *Int Psychogeriatr* 2014;**26**(8):1363-75.
- 25
- 26 33. Uijen A, van de Lisdonk E. Multimorbidity in primary care: prevalence and trend
- 27 over the last 20 years. *Eur J Gen Pract* 2008;**14**(Suppl 1):28-32.
- 28
- 29 34. van den Akker M, Buntinx F, Metsmakers J, et al. Multimorbidity in general
- 30 practice: prevalence, incidence, and determinants of co-occurring chronic and
- 31 recurrent diseases. *J Clin Epidemiol* 1998;**51**(5):367-75.
- 32
- 33 35. Fortin M, Haggerty J, Almirall J, et al. Lifestyle factors and multimorbidity: a
- 34 cross sectional study. *BMC Public Health* 2014;**14**:686.
- 35
- 36 36. Chen HL, Hsiao FY. Risk of hospitalization and healthcare cost associated with
- 37 Diabetes Complication Severity Index in Taiwan's National Health Insurance
- 38 Research Database. *J Diabetes Complications* 2014;**28**(5):612-16.
- 39
- 40 41 37. Chen HL, Hsu WW, Hsiao FY. Changes in prevalence of diabetic complications
- 42 and associated healthcare costs during a 10-year follow-up period among a
- 43 nationwide diabetic cohort. *J Diabetes Complications* 2015;**29**(4):523-28.
- 44
- 45
- 46
- 47
- 48
- 49
- 50
- 51
- 52
- 53
- 54
- 55
- 56
- 57
- 58
- 59
- 60



**Table 1. Prevalence of multimorbidity in Taiwan by number of common diseases \*, age group, and year**

| <b>2003</b>      |                             |                                               |                                                                      |          |          |           |  |
|------------------|-----------------------------|-----------------------------------------------|----------------------------------------------------------------------|----------|----------|-----------|--|
| <b>Age group</b> | <b>Taiwanese population</b> | <b>Prevalence of at least one disease (%)</b> | <b>Prevalence of multimorbidity, by degree of multimorbidity (%)</b> |          |          |           |  |
|                  |                             |                                               | <b>2</b>                                                             | <b>3</b> | <b>4</b> | <b>5+</b> |  |
| 20-29            | 285,406                     | 16.74                                         | 4.01                                                                 | 1.15     | 0.36     | 0.12      |  |
| 30-39            | 273,713                     | 24.09                                         | 8.04                                                                 | 2.86     | 1.03     | 0.37      |  |
| 40-49            | 269,568                     | 35.91                                         | 16.01                                                                | 7.08     | 2.92     | 1.12      |  |
| 50-59            | 175,456                     | 51.70                                         | 30.15                                                                | 16.49    | 8.00     | 3.57      |  |
| 60-69            | 114,876                     | 66.52                                         | 47.08                                                                | 30.39    | 17.13    | 8.70      |  |
| 70-79            | 74,756                      | 77.86                                         | 62.40                                                                | 45.66    | 29.10    | 16.75     |  |
| 80-89            | 20,002                      | 78.05                                         | 64.32                                                                | 48.74    | 32.39    | 19.58     |  |
| 90+              | 1,946                       | 62.23                                         | 45.68                                                                | 33.04    | 21.12    | 12.69     |  |
| All              | 1,215,723                   | 37.23                                         | 20.07                                                                | 11.40    | 6.09     | 3.07      |  |
| <b>2013</b>      |                             |                                               |                                                                      |          |          |           |  |
| <b>Age group</b> | <b>Taiwanese population</b> | <b>Prevalence of at least one disease (%)</b> | <b>Prevalence of multimorbidity, by degree of multimorbidity (%)</b> |          |          |           |  |
|                  |                             |                                               | <b>2</b>                                                             | <b>3</b> | <b>4</b> | <b>5+</b> |  |
| 20-29            | 245,613                     | 19.85 †                                       | 5.21                                                                 | 1.49     | 0.47     | 0.15      |  |
| 30-39            | 295,797                     | 30.49 †                                       | 11.18                                                                | 4.10     | 1.55     | 0.60      |  |
| 40-49            | 277,889                     | 43.45 †                                       | 21.76                                                                | 10.08    | 4.35     | 1.83      |  |
| 50-59            | 272,719                     | 59.90 †                                       | 37.75                                                                | 20.87    | 10.24    | 4.71      |  |
| 60-69            | 173,213                     | 75.39 †                                       | 56.84                                                                | 37.49    | 21.74    | 11.70     |  |
| 70-79            | 102,826                     | 87.53 †                                       | 74.64                                                                | 57.04    | 38.44    | 23.60     |  |
| 80-89            | 52,978                      | 92.01 †                                       | 82.64                                                                | 68.10    | 49.71    | 33.06     |  |
| 90+              | 8,492                       | 90.44 †                                       | 80.96                                                                | 66.52    | 48.39    | 32.54     |  |
| All              | 1,429,527                   | 48.97 †                                       | 30.44                                                                | 18.61    | 10.73    | 5.94      |  |

\*Hypertension, diabetes, congestive heart failure, coronary syndrome, cardiac dysrhythmias, peripheral vascular disease, cerebrovascular disease, chronic pulmonary disease, renal disease, liver disease, dementia, other neurological disorders, digestive disorders, osteoporosis, arthritis (including rheumatoid arthritis), anxiety dissociative and somatoform disorders, bipolar disorder, depression, schizophrenia and psychotic disorders, and cancer

†P<0.05 compared to prevalence in 2003 using chi-squared tests.

**Table 2. Prevalence of 20 common diseases in Taiwan, by age group and year**

| Disease                      | Year | Number with condition<br>(prevalence, %) | Prevalence of each disease, by age group (%) |       |       |       |       |       |       |       |
|------------------------------|------|------------------------------------------|----------------------------------------------|-------|-------|-------|-------|-------|-------|-------|
|                              |      |                                          | 20-29                                        | 30-39 | 40-49 | 50-59 | 60-69 | 70-79 | 80-89 | 90+   |
| Hypertension                 | 2003 | 126,651(10.42)                           | 0.22                                         | 1.38  | 6.31  | 17.11 | 29.91 | 42.36 | 43.26 | 28.78 |
|                              | 2013 | 260,198(18.20) †                         | 0.43                                         | 2.38  | 9.54  | 22.91 | 39.64 | 55.39 | 61.71 | 56.64 |
| Diabetes                     | 2003 | 56,627(4.66)                             | 0.20                                         | 0.77  | 3.00  | 8.51  | 14.04 | 16.31 | 12.51 | 5.86  |
|                              | 2013 | 126,991(8.88) †                          | 0.35                                         | 1.27  | 4.50  | 11.47 | 21.10 | 26.39 | 25.23 | 18.38 |
| Congestive heart failure     | 2003 | 44,622(3.67)                             | 0.06                                         | 0.38  | 1.80  | 5.35  | 10.43 | 17.25 | 19.95 | 15.88 |
|                              | 2013 | 71,026(4.97) †                           | 0.09                                         | 0.45  | 1.87  | 4.99  | 10.10 | 17.19 | 24.78 | 28.24 |
| Coronary syndrome            | 2003 | 35,539(2.92)                             | 0.04                                         | 0.25  | 1.19  | 3.98  | 8.75  | 14.82 | 16.05 | 11.20 |
|                              | 2013 | 60,367(4.22) †                           | 0.05                                         | 0.27  | 1.43  | 4.19  | 9.38  | 15.29 | 19.72 | 18.86 |
| Cardiac dysrhythmias         | 2003 | 14,337(1.18)                             | 0.14                                         | 0.31  | 0.69  | 1.47  | 2.89  | 5.24  | 6.67  | 5.29  |
|                              | 2013 | 29,098(2.04) †                           | 0.18                                         | 0.32  | 0.83  | 1.79  | 3.76  | 6.95  | 10.88 | 12.69 |
| Peripheral vascular disease  | 2003 | 14,873(1.22)                             | 0.07                                         | 0.13  | 0.44  | 1.23  | 3.34  | 7.10  | 8.70  | 4.78  |
|                              | 2013 | 28,562(2.00) †                           | 0.08                                         | 0.17  | 0.48  | 1.45  | 3.92  | 8.66  | 11.34 | 9.89  |
| Cerebrovascular disease      | 2003 | 28,098(2.31)                             | 0.14                                         | 0.25  | 0.86  | 2.74  | 6.59  | 12.09 | 15.26 | 11.51 |
|                              | 2013 | 56,770(3.97) †                           | 0.18                                         | 0.38  | 1.12  | 3.24  | 7.82  | 15.35 | 22.51 | 23.85 |
| Chronic pulmonary disease    | 2003 | 37,897(3.12)                             | 0.78                                         | 1.32  | 1.95  | 3.46  | 7.25  | 12.22 | 15.14 | 12.85 |
|                              | 2013 | 50,705(3.55) †                           | 0.74                                         | 1.26  | 1.80  | 3.02  | 5.77  | 10.73 | 17.17 | 21.15 |
| Renal disease                | 2003 | 13,999(1.15)                             | 0.18                                         | 0.34  | 0.77  | 1.57  | 2.80  | 4.54  | 5.07  | 3.44  |
|                              | 2013 | 38,748(2.71) †                           | 0.18                                         | 0.44  | 1.06  | 2.44  | 5.19  | 9.64  | 13.79 | 14.13 |
| Liver disease                | 2003 | 43,555(3.58)                             | 1.39                                         | 2.58  | 4.03  | 5.53  | 6.23  | 5.44  | 3.41  | 1.64  |
|                              | 2013 | 71,015(4.97) †                           | 0.79                                         | 2.88  | 5.13  | 7.28  | 8.56  | 8.05  | 5.69  | 4.03  |
| Dementia                     | 2003 | 5,194(0.43)                              | 0.10                                         | 0.12  | 0.17  | 0.27  | 0.72  | 2.24  | 5.06  | 6.27  |
|                              | 2013 | 18,869(1.32) †                           | 0.13                                         | 0.19  | 0.30  | 0.51  | 1.27  | 4.89  | 12.77 | 20.54 |
| Other neurological disorders | 2003 | 124,029(10.20)                           | 4.25                                         | 6.84  | 9.44  | 13.12 | 18.24 | 24.21 | 26.53 | 17.78 |
|                              | 2013 | 217,307(15.20) †                         | 6.54                                         | 10.37 | 13.29 | 16.90 | 21.42 | 29.04 | 33.85 | 31.03 |

**Table 2. Prevalence of 20 common diseases in Taiwan, by age group and year (cont'd)**

| Disease                                               | Year        | Number with condition<br>(prevalence, %) | Prevalence of each disease, by age group (%) |       |       |       |       |       |       |       |
|-------------------------------------------------------|-------------|------------------------------------------|----------------------------------------------|-------|-------|-------|-------|-------|-------|-------|
|                                                       |             |                                          | 20-29                                        | 30-39 | 40-49 | 50-59 | 60-69 | 70-79 | 80-89 | 90+   |
| <b>Digestive disorders</b>                            | <b>2003</b> | 152,161(12.52)                           | 6.81                                         | 8.54  | 11.19 | 14.94 | 21.03 | 29.22 | 32.39 | 25.95 |
|                                                       | <b>2013</b> | 227,327(15.90) †                         | 8.41                                         | 11.15 | 13.40 | 17.09 | 22.01 | 29.06 | 35.24 | 37.48 |
| <b>Osteoporosis</b>                                   | <b>2003</b> | 14,732(1.21)                             | 0.09                                         | 0.13  | 0.49  | 2.04  | 3.59  | 5.02  | 6.08  | 5.45  |
|                                                       | <b>2013</b> | 17,026(1.19)                             | 0.07                                         | 0.11  | 0.23  | 0.74  | 2.10  | 5.23  | 7.67  | 9.15  |
| <b>Arthritis (including rheumatoid arthritis)</b>     | <b>2003</b> | 149,434(12.29)                           | 3.87                                         | 6.34  | 11.05 | 18.01 | 25.54 | 31.95 | 30.18 | 19.63 |
|                                                       | <b>2013</b> | 226,844(15.87) †                         | 4.18                                         | 7.28  | 12.01 | 19.46 | 27.70 | 37.45 | 37.03 | 29.30 |
| <b>Anxiety, dissociative and somatoform disorders</b> | <b>2003</b> | 52,029(4.28)                             | 1.27                                         | 2.48  | 4.17  | 6.34  | 8.48  | 9.99  | 9.49  | 5.91  |
|                                                       | <b>2013</b> | 89,053(6.23) †                           | 1.69                                         | 3.45  | 5.82  | 8.00  | 10.29 | 11.91 | 11.18 | 8.44  |
| <b>Bipolar disorder</b>                               | <b>2003</b> | 8,251(0.68)                              | 0.44                                         | 0.59  | 0.72  | 0.84  | 0.89  | 1.03  | 0.89  | 0.51  |
|                                                       | <b>2013</b> | 15,439(1.08) †                           | 0.51                                         | 0.80  | 1.25  | 1.30  | 1.44  | 1.50  | 1.32  | 0.92  |
| <b>Depression</b>                                     | <b>2003</b> | 11,630(0.96)                             | 0.64                                         | 0.82  | 0.97  | 1.14  | 1.27  | 1.51  | 1.61  | 1.13  |
|                                                       | <b>2013</b> | 24,712(1.73) †                           | 0.86                                         | 1.30  | 1.89  | 2.00  | 2.24  | 2.52  | 2.59  | 2.25  |
| <b>Schizophrenia and psychotic disorders</b>          | <b>2003</b> | 7,472(0.61)                              | 0.48                                         | 0.80  | 0.74  | 0.57  | 0.43  | 0.40  | 0.55  | 0.51  |
|                                                       | <b>2013</b> | 11,624(0.81) †                           | 0.42                                         | 0.82  | 1.10  | 1.00  | 0.77  | 0.65  | 0.55  | 0.67  |
| <b>Cancer</b>                                         | <b>2003</b> | 37,438(3.08)                             | 1.26                                         | 2.22  | 3.77  | 4.11  | 4.47  | 5.50  | 5.46  | 2.93  |
|                                                       | <b>2013</b> | 83,065(5.81) †                           | 1.36                                         | 2.97  | 5.68  | 7.22  | 9.19  | 11.54 | 12.57 | 12.16 |

†P<0.05 compared to prevalence in 2003 using chi-squared tests.

**Table 3. Prevalence of 20 common diseases in Taiwan, by sex, age group and year**

| Disease                     | Year | Prevalence     |        | Prevalence of each disease, by age group (%) |      |       |      |       |      |       |       |       |       |       |       |       |       |       |       |
|-----------------------------|------|----------------|--------|----------------------------------------------|------|-------|------|-------|------|-------|-------|-------|-------|-------|-------|-------|-------|-------|-------|
|                             |      | Prevalence (%) |        | 20-29                                        |      | 30-39 |      | 40-49 |      | 50-59 |       | 60-69 |       | 70-79 |       | 80-89 |       | 90+   |       |
|                             |      | Male           | Female | M                                            | F    | M     | F    | M     | F    | M     | F     | M     | F     | M     | F     | M     | F     | M     | F     |
| Hypertension                | 2003 | 10.52          | 10.33  | 0.33                                         | 0.11 | 1.90  | 0.92 | 7.29  | 5.42 | 17.13 | 17.09 | 27.66 | 31.83 | 39.89 | 44.96 | 41.16 | 45.18 | 29.55 | 28.31 |
|                             | 2013 | 19.40          | 17.13  | 0.68                                         | 0.21 | 3.58  | 1.35 | 12.67 | 6.71 | 25.93 | 20.10 | 40.55 | 38.81 | 51.88 | 58.30 | 58.03 | 65.22 | 54.02 | 58.70 |
| Diabetes                    | 2003 | 4.77           | 4.56   | 0.21                                         | 0.19 | 1.05  | 0.51 | 3.73  | 2.34 | 9.15  | 7.94  | 13.07 | 14.86 | 14.10 | 18.64 | 11.47 | 13.47 | 5.75  | 5.93  |
|                             | 2013 | 9.57           | 8.26   | 0.40                                         | 0.31 | 1.75  | 0.86 | 6.18  | 2.97 | 13.52 | 9.56  | 21.87 | 20.40 | 24.50 | 27.96 | 22.52 | 27.81 | 17.60 | 18.99 |
| Congestive heart failure    | 2003 | 3.71           | 3.63   | 0.09                                         | 0.03 | 0.54  | 0.24 | 2.12  | 1.51 | 5.48  | 5.25  | 9.58  | 11.16 | 16.27 | 18.28 | 19.34 | 20.51 | 17.10 | 15.14 |
|                             | 2013 | 5.24           | 4.72   | 0.14                                         | 0.04 | 0.68  | 0.25 | 2.56  | 1.25 | 5.82  | 4.21  | 10.67 | 9.58  | 16.02 | 18.15 | 23.37 | 26.13 | 27.04 | 29.18 |
| Coronary syndrome           | 2003 | 3.21           | 2.67   | 0.05                                         | 0.03 | 0.33  | 0.17 | 1.51  | 0.89 | 4.47  | 3.55  | 8.81  | 8.70  | 15.53 | 14.07 | 16.88 | 15.30 | 11.76 | 10.86 |
|                             | 2013 | 5.00           | 3.52   | 0.06                                         | 0.04 | 0.44  | 0.13 | 2.14  | 0.78 | 5.49  | 2.99  | 11.24 | 7.71  | 16.41 | 14.36 | 20.94 | 18.55 | 20.42 | 17.65 |
| Cardiac dysrhythmias        | 2003 | 1.19           | 1.17   | 0.13                                         | 0.15 | 0.29  | 0.33 | 0.64  | 0.73 | 1.39  | 1.54  | 2.90  | 2.88  | 5.40  | 5.06  | 6.85  | 6.51  | 6.57  | 4.53  |
|                             | 2013 | 2.10           | 1.98   | 0.16                                         | 0.20 | 0.31  | 0.34 | 0.85  | 0.81 | 1.83  | 1.77  | 3.94  | 3.60  | 7.08  | 6.84  | 11.69 | 10.11 | 12.81 | 12.61 |
| Peripheral vascular disease | 2003 | 1.23           | 1.22   | 0.08                                         | 0.06 | 0.16  | 0.11 | 0.47  | 0.41 | 1.20  | 1.25  | 3.01  | 3.62  | 7.01  | 7.19  | 8.97  | 8.46  | 5.61  | 4.28  |
|                             | 2013 | 2.00           | 2.00   | 0.06                                         | 0.10 | 0.18  | 0.16 | 0.54  | 0.44 | 1.60  | 1.32  | 3.83  | 4.00  | 8.06  | 9.16  | 11.76 | 10.95 | 11.25 | 8.82  |
| Cerebrovascular disease     | 2003 | 2.61           | 2.04   | 0.16                                         | 0.12 | 0.34  | 0.18 | 1.07  | 0.67 | 3.18  | 2.36  | 7.05  | 6.19  | 13.01 | 11.11 | 16.29 | 14.31 | 14.09 | 9.96  |
|                             | 2013 | 4.54           | 3.46   | 0.19                                         | 0.17 | 0.47  | 0.29 | 1.47  | 0.80 | 4.05  | 2.50  | 9.15  | 6.61  | 16.65 | 14.28 | 24.45 | 20.67 | 24.81 | 23.09 |

**Table 3. Prevalence of 20 common diseases in Taiwan, by sex, age group and year (cont'd)**

| Disease                      | Year | Prevalence     |        | Prevalence of each disease, by age group (%) |      |       |       |       |       |       |       |       |       |       |       |       |       |       |       |
|------------------------------|------|----------------|--------|----------------------------------------------|------|-------|-------|-------|-------|-------|-------|-------|-------|-------|-------|-------|-------|-------|-------|
|                              |      | Prevalence (%) |        | 20-29                                        |      | 30-39 |       | 40-49 |       | 50-59 |       | 60-69 |       | 70-79 |       | 80-89 |       | 90+   |       |
|                              |      | Male           | Female | M                                            | F    | M     | F     | M     | F     | M     | F     | M     | F     | M     | F     | M     | F     | M     | F     |
| Chronic pulmonary disease    | 2003 | 3.51           | 2.76   | 0.80                                         | 0.76 | 1.24  | 1.39  | 1.99  | 1.93  | 3.50  | 3.41  | 8.02  | 6.59  | 15.19 | 9.08  | 19.80 | 10.86 | 17.51 | 10.04 |
|                              | 2013 | 4.00           | 3.14   | 0.71                                         | 0.76 | 1.16  | 1.34  | 1.75  | 1.85  | 3.09  | 2.96  | 6.52  | 5.10  | 13.26 | 8.62  | 21.96 | 12.60 | 26.98 | 16.58 |
| Renal disease                | 2003 | 1.29           | 1.03   | 0.22                                         | 0.15 | 0.42  | 0.27  | 0.86  | 0.68  | 1.68  | 1.48  | 3.02  | 2.62  | 4.90  | 4.16  | 6.09  | 4.14  | 4.51  | 2.80  |
|                              | 2013 | 3.26           | 2.22   | 0.21                                         | 0.15 | 0.58  | 0.32  | 1.42  | 0.72  | 3.04  | 1.89  | 6.25  | 4.23  | 11.26 | 8.29  | 15.84 | 11.85 | 16.96 | 11.91 |
| Liver disease                | 2003 | 4.61           | 2.66   | 2.12                                         | 0.76 | 3.95  | 1.36  | 5.64  | 2.56  | 6.38  | 4.78  | 6.70  | 5.83  | 5.59  | 5.28  | 3.90  | 2.96  | 2.19  | 1.32  |
|                              | 2013 | 6.20           | 3.86   | 1.12                                         | 0.49 | 4.30  | 1.66  | 7.35  | 3.12  | 8.92  | 5.76  | 9.21  | 7.97  | 8.49  | 7.68  | 6.13  | 5.28  | 4.66  | 3.53  |
| Dementia                     | 2003 | 0.46           | 0.39   | 0.15                                         | 0.06 | 0.18  | 0.07  | 0.21  | 0.13  | 0.32  | 0.23  | 0.75  | 0.70  | 2.14  | 2.35  | 4.82  | 5.28  | 4.24  | 7.49  |
|                              | 2013 | 1.31           | 1.33   | 0.16                                         | 0.10 | 0.26  | 0.14  | 0.41  | 0.20  | 0.63  | 0.41  | 1.31  | 1.23  | 4.52  | 5.20  | 11.70 | 13.79 | 18.81 | 21.89 |
| Other neurological disorders | 2003 | 8.00           | 12.17  | 3.29                                         | 5.08 | 5.24  | 8.27  | 6.90  | 11.76 | 9.31  | 16.48 | 14.62 | 21.32 | 21.26 | 27.32 | 23.99 | 28.86 | 17.10 | 18.19 |
|                              | 2013 | 12.02          | 18.05  | 4.74                                         | 8.19 | 7.79  | 12.59 | 10.02 | 16.25 | 12.66 | 20.81 | 16.84 | 25.58 | 25.34 | 32.12 | 32.25 | 35.37 | 30.73 | 31.26 |

**Table 3. Prevalence of 20 common diseases in Taiwan, by sex, age group and year (cont'd)**

| Disease                                        | Year | Prevalence (%) |        | Prevalence of each disease, by age group (%) |       |       |       |       |       |       |       |       |       |       |       |       |       |       |       |
|------------------------------------------------|------|----------------|--------|----------------------------------------------|-------|-------|-------|-------|-------|-------|-------|-------|-------|-------|-------|-------|-------|-------|-------|
|                                                |      |                |        | 20-29                                        |       | 30-39 |       | 40-49 |       | 50-59 |       | 60-69 |       | 70-79 |       | 80-89 |       | 90+   |       |
|                                                |      | Male           | Female | M                                            | F     | M     | F     | M     | F     | M     | F     | M     | F     | M     | F     | M     | F     | M     | F     |
| Digestive disorders                            | 2003 | 11.62          | 13.32  | 4.92                                         | 8.46  | 7.63  | 9.35  | 10.53 | 11.79 | 13.78 | 15.96 | 19.84 | 22.04 | 29.87 | 28.54 | 34.65 | 30.32 | 28.04 | 24.69 |
|                                                | 2013 | 14.01          | 17.60  | 5.65                                         | 10.93 | 8.59  | 13.34 | 11.63 | 15.00 | 15.14 | 18.91 | 20.14 | 23.69 | 28.32 | 29.67 | 37.55 | 33.04 | 41.88 | 34.03 |
| Osteoporosis                                   | 2003 | 0.45           | 1.89   | 0.13                                         | 0.05  | 0.14  | 0.13  | 0.26  | 0.70  | 0.41  | 3.48  | 0.91  | 5.87  | 2.07  | 8.14  | 2.75  | 9.14  | 4.10  | 6.26  |
|                                                | 2013 | 0.58           | 1.74   | 0.09                                         | 0.05  | 0.15  | 0.08  | 0.26  | 0.21  | 0.45  | 1.02  | 0.76  | 3.31  | 1.98  | 7.93  | 3.72  | 11.43 | 5.25  | 12.21 |
| Arthritis (including rheumatoid arthritis)     | 2003 | 12.26          | 12.32  | 4.81                                         | 3.05  | 7.46  | 5.35  | 11.49 | 10.65 | 16.09 | 19.70 | 22.43 | 28.20 | 30.16 | 33.85 | 29.71 | 30.61 | 22.85 | 17.70 |
|                                                | 2013 | 15.32          | 16.36  | 4.89                                         | 3.53  | 8.75  | 6.03  | 12.75 | 11.34 | 18.01 | 20.80 | 24.02 | 31.04 | 32.67 | 41.43 | 35.62 | 38.37 | 30.49 | 28.36 |
| Anxiety, dissociative and somatoform disorders | 2003 | 3.36           | 5.10   | 1.11                                         | 1.42  | 2.05  | 2.86  | 3.26  | 5.01  | 4.47  | 7.99  | 6.27  | 10.36 | 8.18  | 11.91 | 8.46  | 10.44 | 6.43  | 5.60  |
|                                                | 2013 | 4.90           | 7.42   | 1.50                                         | 1.86  | 2.95  | 3.87  | 4.76  | 6.78  | 5.99  | 9.87  | 7.55  | 12.78 | 9.09  | 14.26 | 9.34  | 12.94 | 7.93  | 8.84  |
| Bipolar disorder                               | 2003 | 0.55           | 0.79   | 0.43                                         | 0.45  | 0.44  | 0.72  | 0.55  | 0.87  | 0.63  | 1.02  | 0.72  | 1.03  | 0.87  | 1.20  | 0.76  | 1.02  | 0.55  | 0.49  |
|                                                | 2013 | 0.84           | 1.29   | 0.51                                         | 0.51  | 0.65  | 0.93  | 0.95  | 1.52  | 0.97  | 1.62  | 1.04  | 1.79  | 1.10  | 1.84  | 1.09  | 1.54  | 0.99  | 0.86  |
| Depression                                     | 2003 | 0.80           | 1.10   | 0.66                                         | 0.62  | 0.65  | 0.98  | 0.76  | 1.15  | 0.86  | 1.39  | 1.00  | 1.50  | 1.32  | 1.71  | 1.44  | 1.77  | 0.82  | 1.32  |
|                                                | 2013 | 1.42           | 2.00   | 0.87                                         | 0.84  | 1.11  | 1.47  | 1.56  | 2.19  | 1.56  | 2.42  | 1.70  | 2.73  | 1.96  | 2.98  | 2.23  | 2.93  | 2.20  | 2.29  |
| Schizophrenia and psychotic disorders          | 2003 | 0.68           | 0.56   | 0.62                                         | 0.37  | 0.96  | 0.65  | 0.81  | 0.68  | 0.51  | 0.62  | 0.34  | 0.51  | 0.37  | 0.43  | 0.49  | 0.61  | 0.41  | 0.58  |
|                                                | 2013 | 0.89           | 0.75   | 0.50                                         | 0.35  | 0.98  | 0.68  | 1.32  | 0.91  | 1.04  | 0.97  | 0.70  | 0.85  | 0.51  | 0.77  | 0.49  | 0.60  | 0.59  | 0.74  |
| Cancer                                         | 2003 | 2.21           | 3.85   | 0.90                                         | 1.58  | 1.22  | 3.11  | 1.80  | 5.56  | 2.80  | 5.26  | 4.26  | 4.66  | 6.22  | 4.73  | 6.82  | 4.21  | 4.38  | 2.06  |
|                                                | 2013 | 5.06           | 6.49   | 1.02                                         | 1.67  | 1.82  | 3.95  | 3.41  | 7.73  | 5.76  | 8.57  | 9.09  | 9.29  | 13.37 | 10.02 | 15.81 | 9.49  | 16.21 | 8.99  |

**Figure 1. Prevalence of multi-morbidity in Taiwan by number of common diseases \*, sex, age group, and year**

**(a) Men and women in 2003**

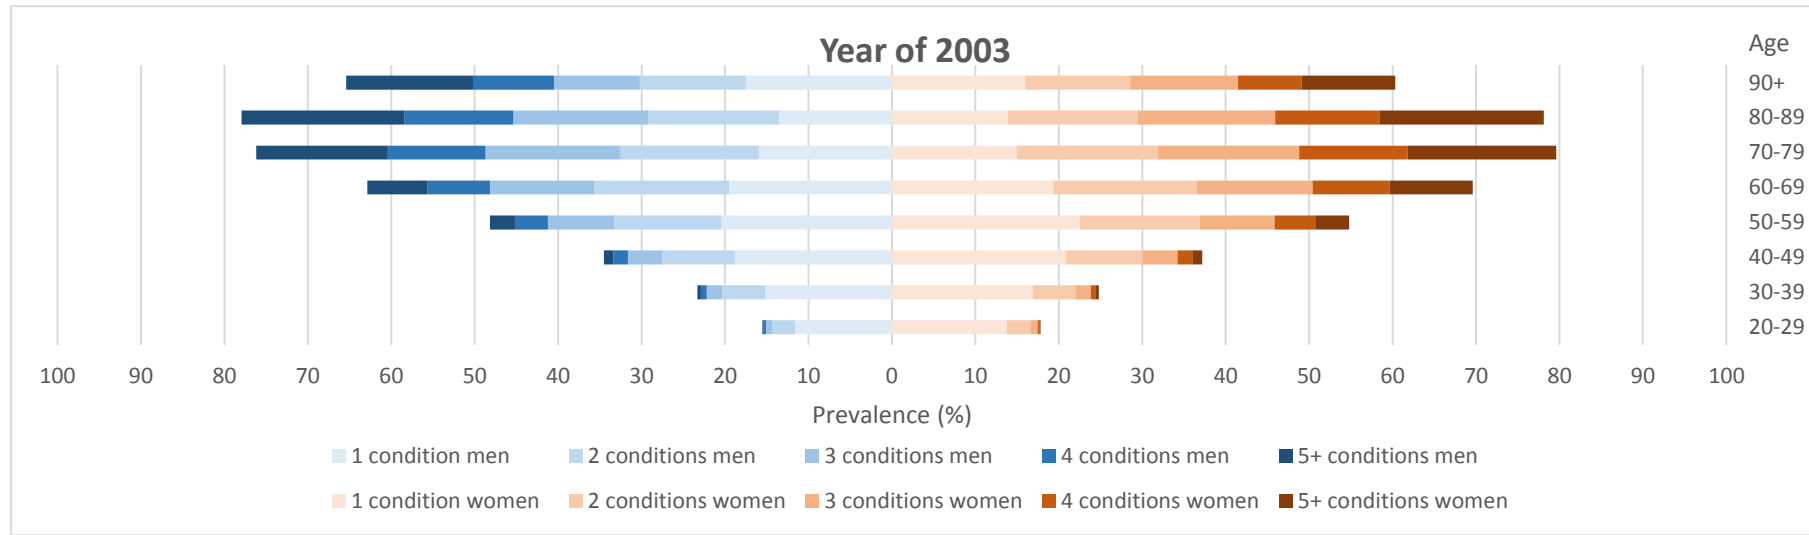

**(b) Men and women in 2013**

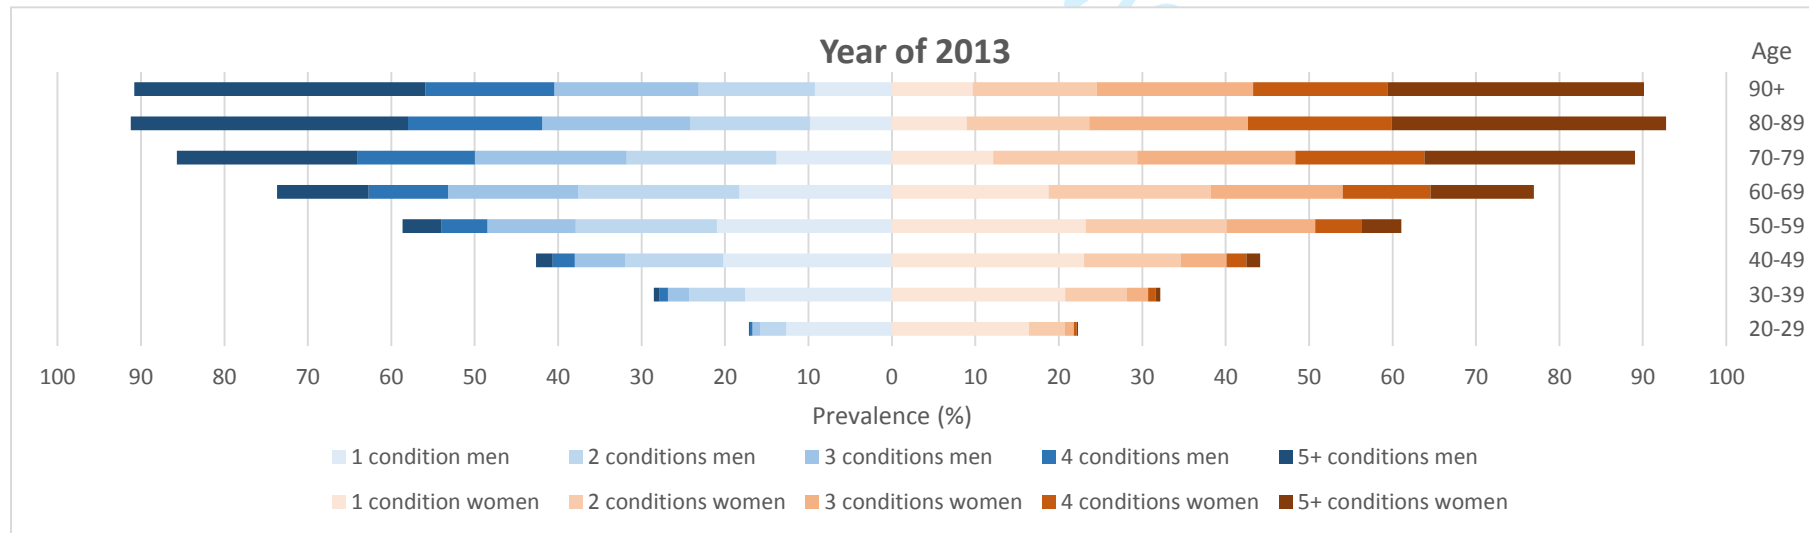

\*Hypertension, diabetes, congestive heart failure, coronary syndrome, cardiac dysrhythmias, peripheral vascular disease, cerebrovascular disease, chronic pulmonary disease, renal disease, liver disease, dementia, other neurological disorders, digestive disorder, osteoporosis, arthritis (including rheumatoid arthritis), anxiety dissociative and somatoform disorders, bipolar disorder, depression, schizophrenia and psychotic disorders, and cancer

Figure 2. Prevalence of multi-morbidity in Taiwan within common diseases, by sex and year.

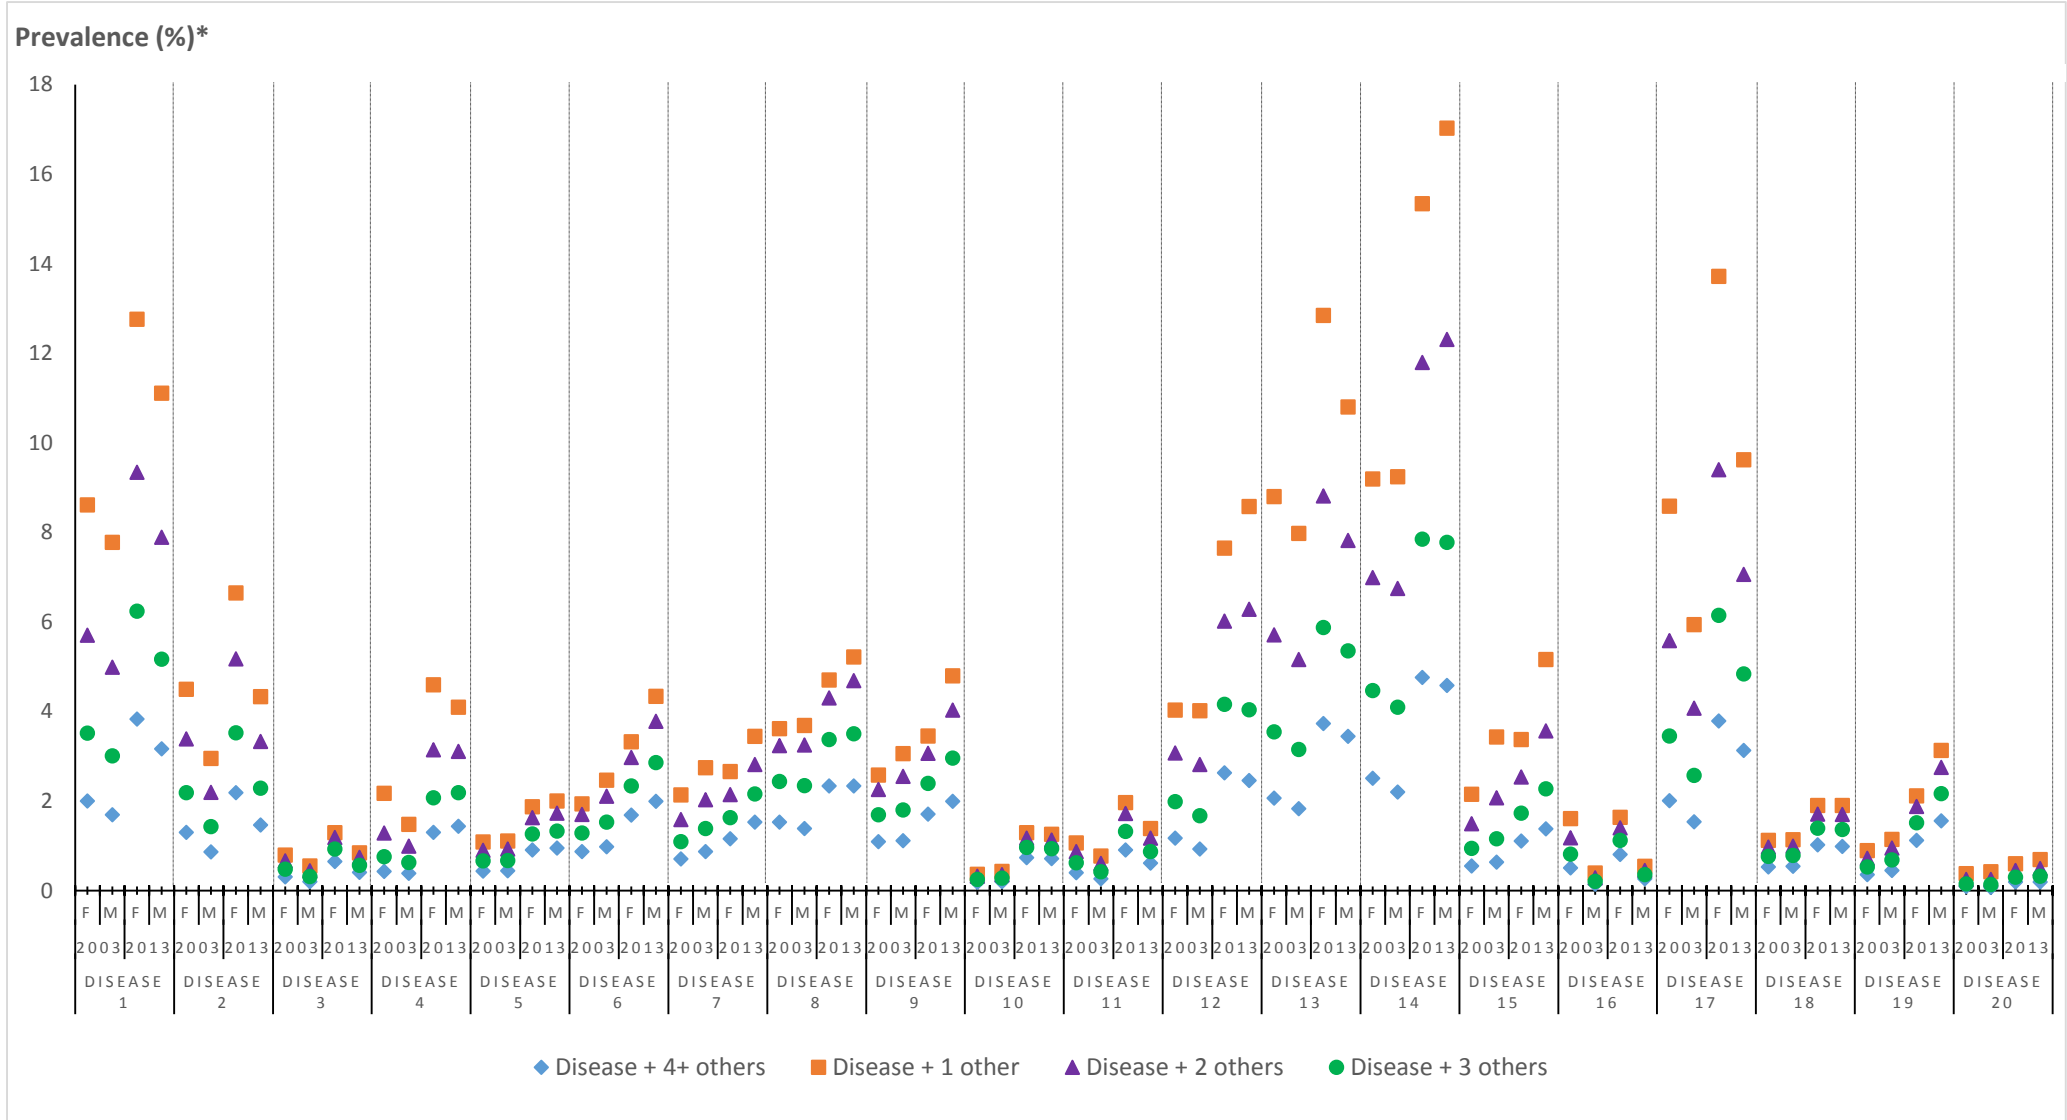

\*Prevalence (%): the number of patients suffering from a specific disease with concurrent 1, 2, 3, or 4+ other diseases divided by the number of patients with a specific disease. (Disease 1: Anxiety, dissociative and somatoform disorders; Disease 2: Arthritis (including rheumatoid arthritis); Disease 3: Bipolar disorder; Disease 4: Cancer; Disease 5: Cardiac dysrhythmias; Disease 6: Cerebrovascular disease; Disease 7: Chronic pulmonary disease; Disease 8: Congestive heart failure; Disease 9: Coronary syndrome; Disease 10: Dementia; Disease 11: Depression; Disease 12: Diabetes; Disease 13: Digestive disorders; Disease 14: Hypertension; Disease 15: Liver disease; Disease 16: Osteoporosis; Disease 17: Other neurological disorders; Disease 18: Peripheral vascular disease; Disease 19: Renal disease; Disease 20: Schizophrenia and psychotic disorders.)



Table S1. ICD-9-CM codes regarding the definition of 20 common diseases

| <b>Disease</b>                             | <b>ICD-9-CM code</b>                                                                                                                                                                                                                                                                                                                                                                    |
|--------------------------------------------|-----------------------------------------------------------------------------------------------------------------------------------------------------------------------------------------------------------------------------------------------------------------------------------------------------------------------------------------------------------------------------------------|
| Hypertension                               | 401, 402, 403, 404, 405                                                                                                                                                                                                                                                                                                                                                                 |
| Diabetes                                   | 250                                                                                                                                                                                                                                                                                                                                                                                     |
| Congestive heart failure                   | 39891, 40201, 40211, 40291, 40401, 40403, 40411, 40413, 40491, 40493, 4254, 4255, 4257, 4258, 4259, 428                                                                                                                                                                                                                                                                                 |
| Coronary syndrome                          | 410, 411, 412, 413, 414                                                                                                                                                                                                                                                                                                                                                                 |
| Cardiac dysrhythmias                       | 427                                                                                                                                                                                                                                                                                                                                                                                     |
| Peripheral vascular disease                | 0930, 4373, 4400, 4401, 44020, 44021, 44022, 44023, 44024, 44029, 44030, 44031, 44032, 4408, 4409, 44100, 44101, 44102, 44103, 4411, 4412, 4413, 4414, 4415, 4416, 4417, 4419, 4431, 44321, 44322, 44323, 44324, 44329, 44381, 44382, 44389, 4439, 4471, 5571, 5579, V434                                                                                                               |
| Cerebrovascular disease                    | 36234, 430, 431, 432, 43300, 43301, 43310, 43311, 43320, 43321, 43330, 43331, 43380, 43381, 43390, 43391, 434, 4350, 4351, 4352, 4353, 4358, 4359, 436, 437, 438                                                                                                                                                                                                                        |
| Chronic pulmonary disease                  | 4168, 4169, 490, 491, 492, 493, 4940, 4941, 4950, 4951, 4952, 4953, 4954, 4955, 4956, 4957, 4958, 4959, 496, 500, 501, 502, 503, 504, 505, 5064, 5081, 5088                                                                                                                                                                                                                             |
| Renal disease                              | 403, 404, 5820, 5821, 5822, 5824, 58281, 58289, 5829, 5830, 5831, 5832, 5834, 5836, 5837, 584, 585, 586, 5880, V420, V451, V560, V561, V562, V5631, V5632, V568                                                                                                                                                                                                                         |
| Liver disease                              | 07022, 07023, 07032, 07033, 07044, 07054, 0706, 0709, 570, 5710, 5711, 5712, 5713, 57140, 57141, 57149, 5715, 5716, 5718, 5719, 5733, 5734, 5738, 5739, V427, 4560, 4561, 45620, 45621, 5722, 5723, 5724, 5728                                                                                                                                                                          |
| Dementia                                   | 290, 2930, 2931, 29381, 29382, 29383, 29384, 29389, 2939, 2940, 2941, 2948, 2949, 3100, 3101, 3102, 3108, 3109, 3310, 3311, 3312                                                                                                                                                                                                                                                        |
| Other neurological disorders               | 3319, 332, 3334, 3335, 33392, 3340, 3341, 3342, 3343, 3344, 3348, 3349, 3350, 33510, 33511, 33519, 33520, 33521, 33522, 33523, 33524, 33529, 3358, 3359, 3362, 340, 3410, 3411, 34120, 34121, 34122, 3418, 3419, 34500, 34501, 34510, 34511, 3452, 3453, 34540, 34541, 34550, 34551, 34560, 34561, 34570, 34571, 34580, 34581, 34590, 34591, 3481, 3483, 34830, 34831, 34839, 780, 7843 |
| Digestive disorder                         | 530, 531, 532, 53300, 53301, 53310, 53311, 53320, 53321, 53330, 53331, 53340, 53341, 53350, 53351, 53360, 53361, 53370, 53371, 53390, 53391, 53400, 53401, 53410, 53411, 53420, 53421, 53430, 53431, 53440, 53441, 53450, 53451, 53460, 53461, 53470, 53471, 53490, 53491, 536, 558, 564                                                                                                |
| Osteoporosis                               | 733                                                                                                                                                                                                                                                                                                                                                                                     |
| Arthritis (including rheumatoid arthritis) | 274, 710, 711, 714, 715, 716, 718, 720, 727, 728, 729, 739                                                                                                                                                                                                                                                                                                                              |

Table S1. ICD-9-CM codes regarding the definition of 20 common diseases (continued)

| <b>Disease</b>                                 | <b>ICD-9-CM code</b>                                                                                                                                                                                                                   |
|------------------------------------------------|----------------------------------------------------------------------------------------------------------------------------------------------------------------------------------------------------------------------------------------|
| Anxiety, dissociative and somatoform disorders | 30000-30002, 30009-30016, 30019-30023, 30029, 3003, 3005-3007, 30081, 30082, 30089, 3009, 3062, 3069, 30740-30749, 3080-3084, 3089, 316                                                                                                |
| Bipolar disorder                               | 29600-29606, 29610-29616, 29640-29646, 29650-29656, 29660-29666, 2967, 29680-29682, 29689                                                                                                                                              |
| Depression                                     | 29620-29626, 29630-29636, 29690, 29699, 2980, 3090, 3091, 311                                                                                                                                                                          |
| Schizophrenia and psychotic disorders          | 29500-29505, 29510-29515, 29520-29525, 29530-29535, 29540-29545, 29550-29555, 29560-29565, 29570-29575, 29580-29585, 29590-29595, 2970-2973, 2978, 2979, 2981-2984, 2988, 2989, 29900, 29901, 29910, 29911, 29980, 29981, 29990, 29991 |
| Cancer                                         | 140-239                                                                                                                                                                                                                                |

Figure S1. The sampling and data linkage process of the 2005 and 2010 Longitudinal Health Insurance Databases (LHID)

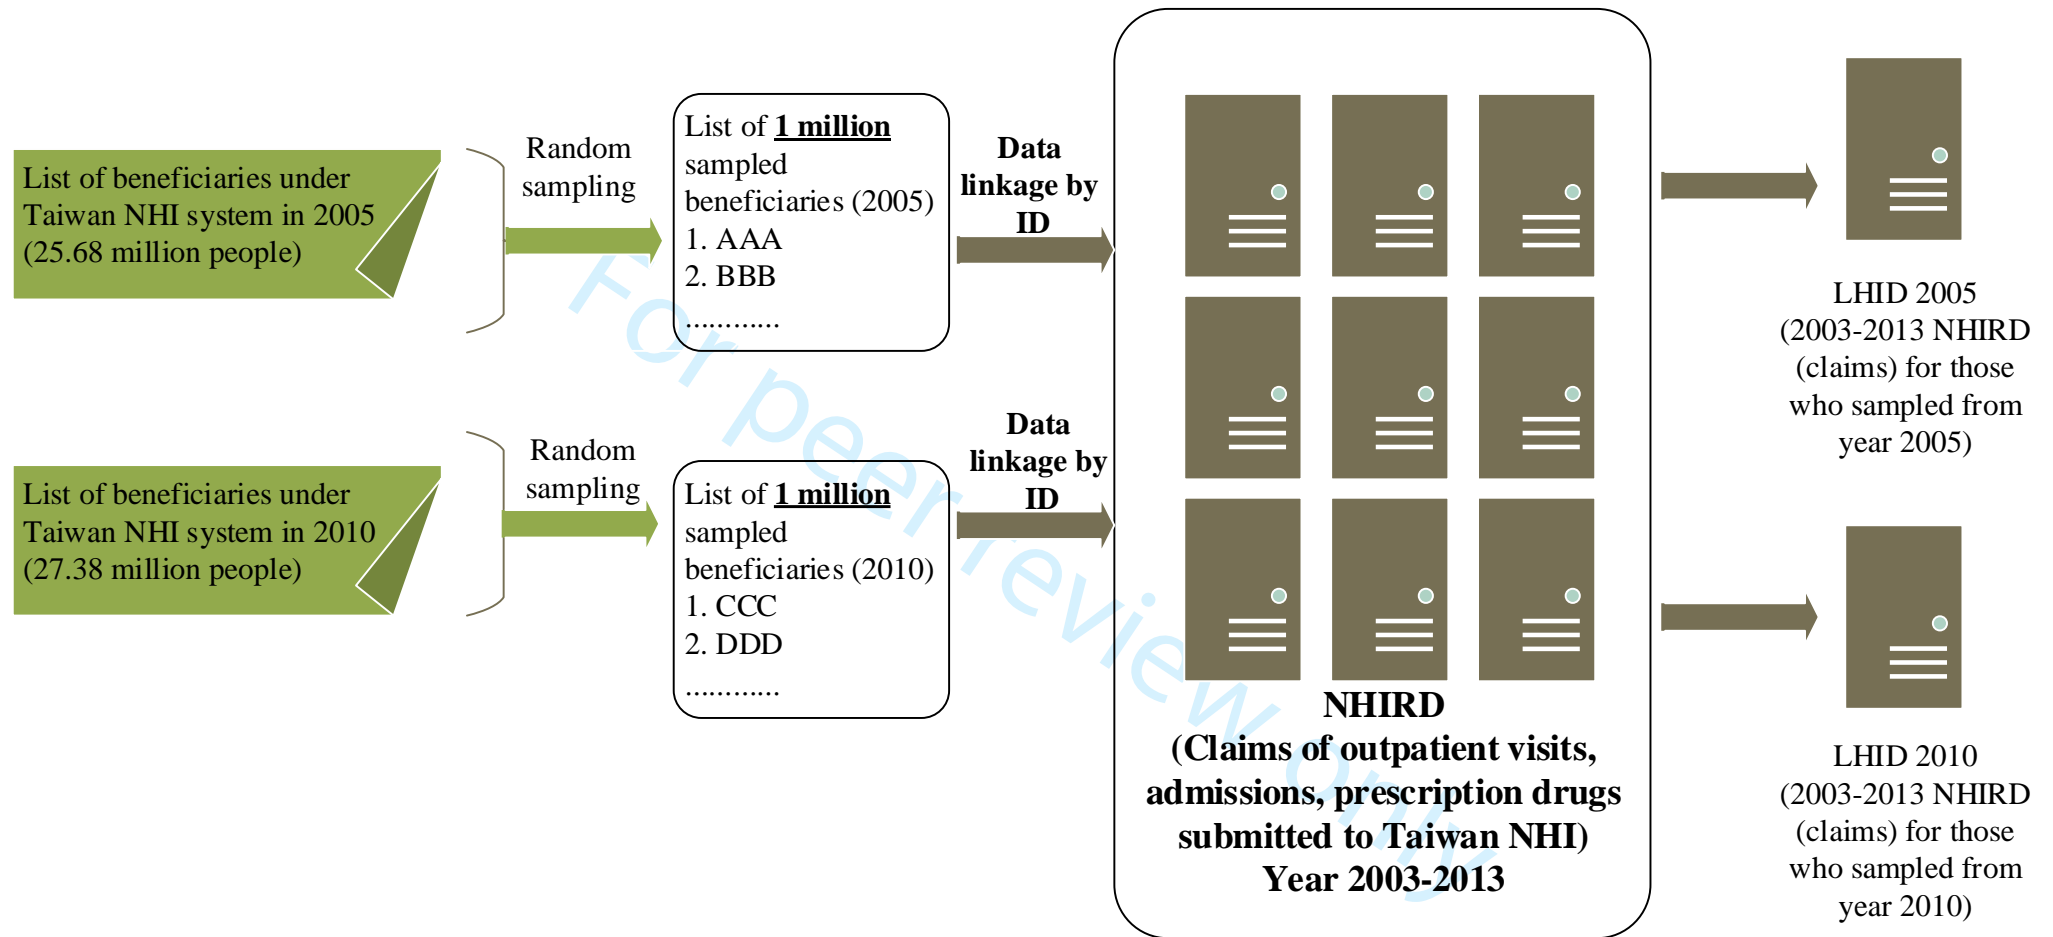

Figure S2. Prevalence of multi-morbidity in Taiwan by number of common diseases, age group, and year

(a) Year of 2003

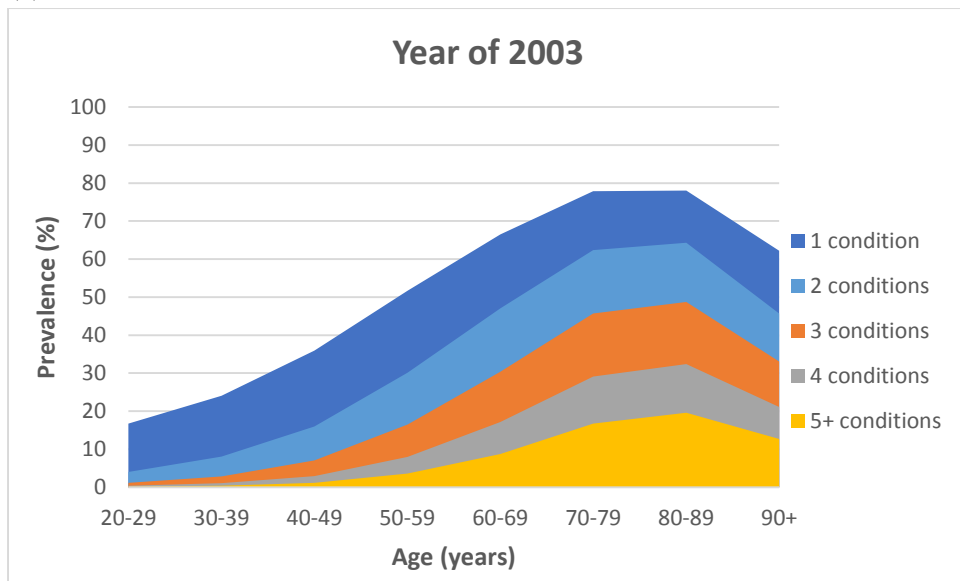

(b) Year of 2013

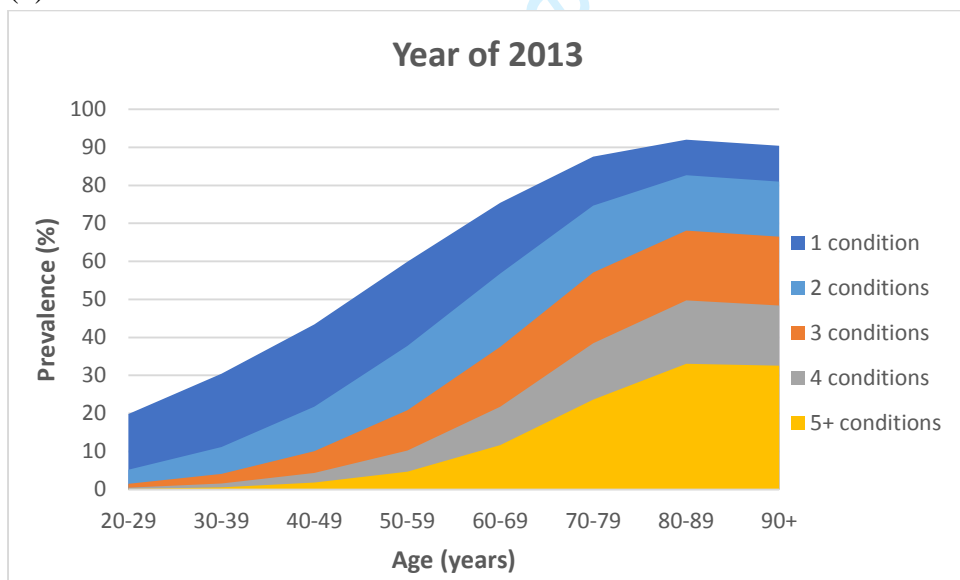

## STROBE Statement—checklist of items that should be included in reports of observational studies

|                              | Item No | Recommendation                                                                                                                                                                                                                                                                                                                                                                                                                                                         |                |
|------------------------------|---------|------------------------------------------------------------------------------------------------------------------------------------------------------------------------------------------------------------------------------------------------------------------------------------------------------------------------------------------------------------------------------------------------------------------------------------------------------------------------|----------------|
| <b>Title and abstract</b>    | 1       | (a) Indicate the study's design with a commonly used term in the title or the abstract                                                                                                                                                                                                                                                                                                                                                                                 | p.1            |
|                              |         | (b) Provide in the abstract an informative and balanced summary of what was done and what was found                                                                                                                                                                                                                                                                                                                                                                    | p.3            |
| <b>Introduction</b>          |         |                                                                                                                                                                                                                                                                                                                                                                                                                                                                        |                |
| Background/rationale         | 2       | Explain the scientific background and rationale for the investigation being reported                                                                                                                                                                                                                                                                                                                                                                                   | p.6-7          |
| Objectives                   | 3       | State specific objectives, including any prespecified hypotheses                                                                                                                                                                                                                                                                                                                                                                                                       | p.8            |
| <b>Methods</b>               |         |                                                                                                                                                                                                                                                                                                                                                                                                                                                                        |                |
| Study design                 | 4       | Present key elements of study design early in the paper                                                                                                                                                                                                                                                                                                                                                                                                                | p.9            |
| Setting                      | 5       | Describe the setting, locations, and relevant dates, including periods of recruitment, exposure, follow-up, and data collection                                                                                                                                                                                                                                                                                                                                        | p.9-10         |
| Participants                 | 6       | (a) <i>Cohort study</i> —Give the eligibility criteria, and the sources and methods of selection of participants. Describe methods of follow-up<br><i>Case-control study</i> —Give the eligibility criteria, and the sources and methods of case ascertainment and control selection. Give the rationale for the choice of cases and controls<br><i>Cross-sectional study</i> —Give the eligibility criteria, and the sources and methods of selection of participants | p.9            |
|                              |         | (b) <i>Cohort study</i> —For matched studies, give matching criteria and number of exposed and unexposed<br><i>Case-control study</i> —For matched studies, give matching criteria and the number of controls per case                                                                                                                                                                                                                                                 | Not applicable |
| Variables                    | 7       | Clearly define all outcomes, exposures, predictors, potential confounders, and effect modifiers. Give diagnostic criteria, if applicable                                                                                                                                                                                                                                                                                                                               | p.11-13        |
| Data sources/<br>measurement | 8*      | For each variable of interest, give sources of data and details of methods of assessment (measurement). Describe comparability of assessment methods if there is more than one group                                                                                                                                                                                                                                                                                   | p.9-10         |
| Bias                         | 9       | Describe any efforts to address potential sources of bias                                                                                                                                                                                                                                                                                                                                                                                                              | Not applicable |
| Study size                   | 10      | Explain how the study size was arrived at                                                                                                                                                                                                                                                                                                                                                                                                                              | p.9-10         |
| Quantitative<br>variables    | 11      | Explain how quantitative variables were handled in the analyses. If applicable, describe which groupings were chosen and why                                                                                                                                                                                                                                                                                                                                           | p.11-13        |
| Statistical methods          | 12      | (a) Describe all statistical methods, including those used to control for confounding                                                                                                                                                                                                                                                                                                                                                                                  | p.13-14        |
|                              |         | (b) Describe any methods used to examine subgroups and interactions                                                                                                                                                                                                                                                                                                                                                                                                    | p.13-14        |
|                              |         | (c) Explain how missing data were addressed                                                                                                                                                                                                                                                                                                                                                                                                                            | Not applicable |
|                              |         | (d) <i>Cohort study</i> —If applicable, explain how loss to follow-up was addressed<br><i>Case-control study</i> —If applicable, explain how matching of cases and controls was addressed<br><i>Cross-sectional study</i> —If applicable, describe analytical methods taking account of sampling strategy                                                                                                                                                              | Not applicable |
|                              |         | (e) Describe any sensitivity analyses                                                                                                                                                                                                                                                                                                                                                                                                                                  | Not applicable |

1  
2  
3  
4  
5  
6  
7  
8  
9  
10  
11  
12  
13  
14  
15  
16  
17  
18  
19  
20  
21  
22  
23  
24  
25  
26  
27  
28  
29  
30  
31  
32  
33  
34  
35  
36  
37  
38  
39  
40  
41  
42  
43  
44  
45  
46  
47  
48  
49  
50  
51  
52  
53  
54  
55  
56  
57  
58  
59  
60

| <b>Results</b>           |     |                                                                                                                                                                                                              |                |
|--------------------------|-----|--------------------------------------------------------------------------------------------------------------------------------------------------------------------------------------------------------------|----------------|
| Participants             | 13* | (a) Report numbers of individuals at each stage of study—eg numbers potentially eligible, examined for eligibility, confirmed eligible, included in the study, completing follow-up, and analysed            | p.9-10         |
|                          |     | (b) Give reasons for non-participation at each stage                                                                                                                                                         | Not applicable |
|                          |     | (c) Consider use of a flow diagram                                                                                                                                                                           | Not applicable |
| Descriptive data         | 14* | (a) Give characteristics of study participants (eg demographic, clinical, social) and information on exposures and potential confounders                                                                     | p.15, 28       |
|                          |     | (b) Indicate number of participants with missing data for each variable of interest                                                                                                                          | Not applicable |
|                          |     | (c) <i>Cohort study</i> —Summarise follow-up time (eg, average and total amount)                                                                                                                             | Not applicable |
| Outcome data             | 15* | <i>Cohort study</i> —Report numbers of outcome events or summary measures over time                                                                                                                          | Not applicable |
|                          |     | <i>Case-control study</i> —Report numbers in each exposure category, or summary measures of exposure                                                                                                         | Not applicable |
|                          |     | <i>Cross-sectional study</i> —Report numbers of outcome events or summary measures                                                                                                                           | p.15-18, 28-33 |
| Main results             | 16  | (a) Give unadjusted estimates and, if applicable, confounder-adjusted estimates and their precision (eg, 95% confidence interval). Make clear which confounders were adjusted for and why they were included | p.15-18, 28-33 |
|                          |     | (b) Report category boundaries when continuous variables were categorized                                                                                                                                    | p.15-18, 28-33 |
|                          |     | (c) If relevant, consider translating estimates of relative risk into absolute risk for a meaningful time period                                                                                             | Not applicable |
| Other analyses           | 17  | Report other analyses done—eg analyses of subgroups and interactions, and sensitivity analyses                                                                                                               | p.15-18, 28-33 |
| <b>Discussion</b>        |     |                                                                                                                                                                                                              |                |
| Key results              | 18  | Summarise key results with reference to study objectives                                                                                                                                                     | p.19           |
| Limitations              | 19  | Discuss limitations of the study, taking into account sources of potential bias or imprecision. Discuss both direction and magnitude of any potential bias                                                   | p.22-23        |
| Interpretation           | 20  | Give a cautious overall interpretation of results considering objectives, limitations, multiplicity of analyses, results from similar studies, and other relevant evidence                                   | p.19-22        |
| Generalisability         | 21  | Discuss the generalisability (external validity) of the study results                                                                                                                                        | p.22-23        |
| <b>Other information</b> |     |                                                                                                                                                                                                              |                |
| Funding                  | 22  | Give the source of funding and the role of the funders for the present study and, if applicable, for the original study on which the present article is based                                                | p.2            |

\*Give information separately for cases and controls in case-control studies and, if applicable, for exposed and unexposed groups in cohort and cross-sectional studies.

**Note:** An Explanation and Elaboration article discusses each checklist item and gives methodological background and published examples of transparent reporting. The STROBE checklist is best used in conjunction with this article (freely available on the Web sites of PLoS Medicine at <http://www.plosmedicine.org/>, Annals of Internal Medicine at <http://www.annals.org/>, and Epidemiology at <http://www.epidem.com/>). Information on the STROBE Initiative is available at [www.strobe-statement.org](http://www.strobe-statement.org).
